# Supplementary material
Source: PubMed Central journal article supplement (PMC7770830)
Supplement: jm0c01372_si_001.pdf [file jm0c01372_si_001.pdf]

## Supporting information

### **Antitubercular and Antiparasitic 2-Nitroimidazopyrazinones with Improved Potency and Solubility**

Chee Wei Ang<sup>1,#</sup>, Lendl Tan<sup>2,3</sup>, Melissa L. Sykes<sup>4</sup>, Neda AbuGharbiyeh<sup>5</sup>, Anjan Debnath<sup>5</sup>, Janet  
C. Reid<sup>1</sup>, Nicholas P. West<sup>2,3</sup>, Vicky M. Avery<sup>4</sup>, Matthew A. Cooper<sup>1,3</sup>, Mark A.T.  
Blaskovich<sup>1,3\*</sup>

<sup>1</sup> Centre for Superbug Solutions, Institute for Molecular Bioscience, The University of  
Queensland, St Lucia, Queensland 4072, Australia

<sup>2</sup> School of Chemistry and Molecular Bioscience, The University of Queensland, St Lucia,  
Queensland 4072, Australia

<sup>3</sup> Australian Infectious Diseases Research Centre, St Lucia, Queensland 4067, Australia

<sup>4</sup> Discovery Biology, Griffith Institute for Drug Discovery, Griffith University, Nathan,  
Queensland 4111, Australia

<sup>5</sup> Center for Discovery and Innovation in Parasitic Diseases, Skaggs School of Pharmacy and  
Pharmaceutical Sciences, University of California, San Diego, La Jolla, California 92093 United  
States

## Table of Contents

|                                                                                                                                           |     |
|-------------------------------------------------------------------------------------------------------------------------------------------|-----|
| LC/MS/MS detection and analysis parameters for plasma protein binding, microsomal and plasma stability .....                              | S2  |
| Table S1. Mass spectrometer parameters of analogs tested for their plasma protein binding, microsomal and plasma stability.....           | S3  |
| HEK293 mammalian cytotoxicity assay (assay B) for <i>T.b.brucei</i> selectivity .....                                                     | S3  |
| Table S2. Additional cytotoxicity data to determine selectivity indices of compounds <b>17a–k</b> , <b>26a–k</b> , and <b>34a–p</b> ..... | S4  |
| <sup>1</sup> H and <sup>13</sup> C NMR spectra.....                                                                                       | S6  |
| References.....                                                                                                                           | S82 |

### **LC/MS/MS detection and analysis parameters for plasma protein binding, microsomal and plasma stability**

LC/MS/MS analysis was performed using AB Sciex 4000 QTRAP System and Shimadzu Nexara UPLC System equipped with Waters Atlantis T3, 2.1 × 50 mm, 5 μm, with guard column and column temperature was set to 40 °C. Injection volume was 3–5 μL and the autosampler cooler was set to 12 °C. The flow rate was 0.2 mL/min with gradient: 5% B for 1 minute then 5–100% B for 5 minutes (A: 0.1% (v/v) formic acid in water and B: 0.1% (v/v) formic acid in acetonitrile). Mass spectrometer parameters in Selected Reaction Monitoring (SRM) mode are tabulated below:

**Table S1. Mass spectrometer parameters of analogs tested for their plasma protein binding, microsomal and plasma stability.**

| Compound         | Ionization Mode | Declustering Potential | Collision Energy | <i>m/z</i>                 |
|------------------|-----------------|------------------------|------------------|----------------------------|
| pretomanid 2     | positive        | 70                     | 32               | 360.1→174.8<br>360.1→200.9 |
| verapamil        | positive        | 70                     | 35               | 455.3→165.3<br>455.3→303.3 |
| eucatropine      | positive        | 70                     | 30               | 292.3→109.4                |
| carbutamide      | positive        | 70                     | 25               | 272.1→155.8                |
| sulfamethoxazole | positive        | 60                     | 17               | 254.3→155.9                |
| 17k              | positive        | 70                     | 35               | 329.2→105.1                |
| 26j              | positive        | 70                     | 35               | 322.1→143.2                |
| 34e              | positive        | 70                     | 35               | 348.2→168.1                |
| 34g              | positive        | 70                     | 40               | 432.0→252.2                |
| 34j              | positive        | 70                     | 35               | 432.1→252.2                |
| 34k              | positive        | 70                     | 40               | 432.2→252.2                |
| 34p              | positive        | 70                     | 40               | 354.2→174.2                |

### **HEK293 mammalian cytotoxicity assay (assay B) for *T. b. brucei* selectivity**

Compounds were tested for activity against human embryonic kidney cells (HEK293), as described in Sykes et al (2012), with a slight modification, by using resazurin as a viability indicator. Briefly,  $7.27 \times 10^4$  HEK cells/ml were added in 55  $\mu$ L of DMEM, high glucose medium to 384-well plates. Following 24 h incubation at 37°C / 5% CO<sub>2</sub>, compounds were added following pre-dilution in DMEM on a Minitrak compound handling system (PerkinElmer). Cells were grown for 72 h before the addition of 10  $\mu$ L of a final concentration of 49  $\mu$ M of resazurin, prepared in DMEM. Following 4 h incubation, plates were read on an Envision plate reader (PerkinElmer).

IC<sub>50</sub> values were calculated from two independent experiments in GraphPad Prism 6 (GraphPad Software).

**Table S2. Additional cytotoxicity data to determine selectivity indices of compounds 17a–k, 26a–k, and 34a–p.**

| Compound | HEK293<br>(Assay A) <sup>a</sup><br>CC <sub>50</sub> (μM) | HEK293<br>(Assay B) <sup>b</sup><br>CC <sub>50</sub> (μM) | 3T3 <sup>c</sup><br>CC <sub>50</sub> (μM) |
|----------|-----------------------------------------------------------|-----------------------------------------------------------|-------------------------------------------|
| 17a      | >100                                                      | >79.4                                                     | >73.3                                     |
| 17b      | >100                                                      | >79.4                                                     | >73.3                                     |
| 17c      | >100                                                      | >79.4                                                     | >73.3                                     |
| 17d      | >100                                                      | >79.4                                                     | >73.3                                     |
| 17e      | >100                                                      | >79.4                                                     | >73.3                                     |
| 17f      | >100                                                      | >79.4                                                     | >73.3                                     |
| 17g      | >100                                                      | >79.4                                                     | ND                                        |
| 17h      | >100                                                      | ND                                                        | ND                                        |
| 17i      | >100                                                      | >79.4                                                     | >73.3                                     |
| 17j      | >100                                                      | >79.4                                                     | >73.3                                     |
| 17k      | >100                                                      | >79.4                                                     | >73.3                                     |
| 26a      | >100                                                      | >73.3                                                     | ND                                        |
| 26b      | >100                                                      | >73.3                                                     | ND                                        |
| 26c      | >100                                                      | >73.3                                                     | ND                                        |
| 26d      | >100                                                      | >73.3                                                     | ND                                        |
| 26e      | >100                                                      | >73.3                                                     | ND                                        |
| 26f      | >25                                                       | >18.3                                                     | ND                                        |
| 26g      | >118                                                      | ND                                                        | ND                                        |
| 26h      | >94                                                       | >79.4                                                     | >36.6                                     |
| 26i      | >100                                                      | >73.3                                                     | ND                                        |
| 26j      | >100                                                      | >79.4                                                     | >73.3                                     |
| 26k      | >100                                                      | >36.6                                                     | ND                                        |

| <b>Compound</b> | <b>HEK293<br/>(Assay A)<sup>a</sup><br/>CC<sub>50</sub> (μM)</b> | <b>HEK293<br/>(Assay B)<sup>b</sup><br/>CC<sub>50</sub> (μM)</b> | <b>3T3<sup>c</sup><br/>CC<sub>50</sub> (μM)</b> |
|-----------------|------------------------------------------------------------------|------------------------------------------------------------------|-------------------------------------------------|
| <b>34a</b>      | >100                                                             | >73.3                                                            | >36.6                                           |
| <b>34b</b>      | >100                                                             | >79.4                                                            | >73.3                                           |
| <b>34c</b>      | >50                                                              | >36.6                                                            | >36.6                                           |
| <b>34d</b>      | >100                                                             | >73.3                                                            | >73.3                                           |
| <b>34e</b>      | >92                                                              | >79.4                                                            | >36.6                                           |
| <b>34f</b>      | >50                                                              | >36.6                                                            | >18.3                                           |
| <b>34g</b>      | >50                                                              | >39.7                                                            | >36.6                                           |
| <b>34h</b>      | >50                                                              | >36.6                                                            | >18.3                                           |
| <b>34i</b>      | >50                                                              | >36.6                                                            | >36.6                                           |
| <b>34j</b>      | >74                                                              | >79.4                                                            | >36.6                                           |
| <b>34k</b>      | >100                                                             | >79.4                                                            | >36.6                                           |
| <b>34l</b>      | >94                                                              | >79.4                                                            | >36.6                                           |
| <b>34m</b>      | >100                                                             | >79.4                                                            | >36.6                                           |
| <b>34n</b>      | >50                                                              | >36.6                                                            | >18.3                                           |
| <b>34o</b>      | >50                                                              | >39.7                                                            | >18.3                                           |
| <b>34p</b>      | >100                                                             | >73.3                                                            | >36.6                                           |

<sup>a</sup> Assay A was performed based on 20 h of incubation. <sup>b</sup> Assay B was performed based on 72 h of incubation, following a procedure as described in S3. <sup>c</sup> Assay was performed based on 48 h of incubation, to determine the selectivity to *T. cruzi* amastigotes over 3T3 host cells. ND – not determined.

# <sup>1</sup>H and <sup>13</sup>C NMR spectra

## 2-Nitro-7-(2-oxo-2-phenylethyl)imidazo[1,2-a]pyrazin-8(7H)-one (17a)

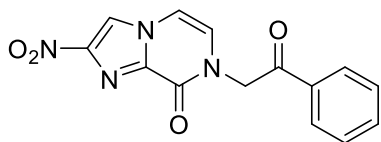

### <sup>1</sup>H NMR (600 MHz, DMSO-d<sub>6</sub>)

| Parameter                  | Value                                       |
|----------------------------|---------------------------------------------|
| 1 Title                    | CWA8692_034_new_ppt_ACN_MeOH.1.fid          |
| 2 Origin                   | Bruker BioSpin GmbH                         |
| 3 Owner                    | nmr                                         |
| 4 Spectrometer             | spect                                       |
| 5 Solvent                  | DMSO                                        |
| 6 Temperature              | 298.0                                       |
| 7 Pulse Sequence           | zg                                          |
| 8 Experiment               | 1D                                          |
| 9 Probe                    | Z129649_0009 (CP TCI 600S3 H&F-C/ N-D-05 Z) |
| 10 Number of Scans         | 32                                          |
| 11 Receiver Gain           | 191.6                                       |
| 12 Relaxation Delay        | 1.0000                                      |
| 13 Pulse Width             | 7.0100                                      |
| 14 Presaturation Frequency |                                             |
| 15 Acquisition Time        | 2.2807                                      |
| 16 Acquisition Date        | 2017-10-08T13:27:40                         |
| 17 Modification Date       | 2017-10-08T13:27:40                         |
| 18 Spectrometer Frequency  | 600.13                                      |
| 19 Spectral Width          | 7183.9                                      |
| 20 Lowest Frequency        | -591.3                                      |
| 21 Nucleus                 | <sup>1</sup> H                              |
| 22 Acquired Size           | 16384                                       |
| 23 Spectral Size           | 65536                                       |

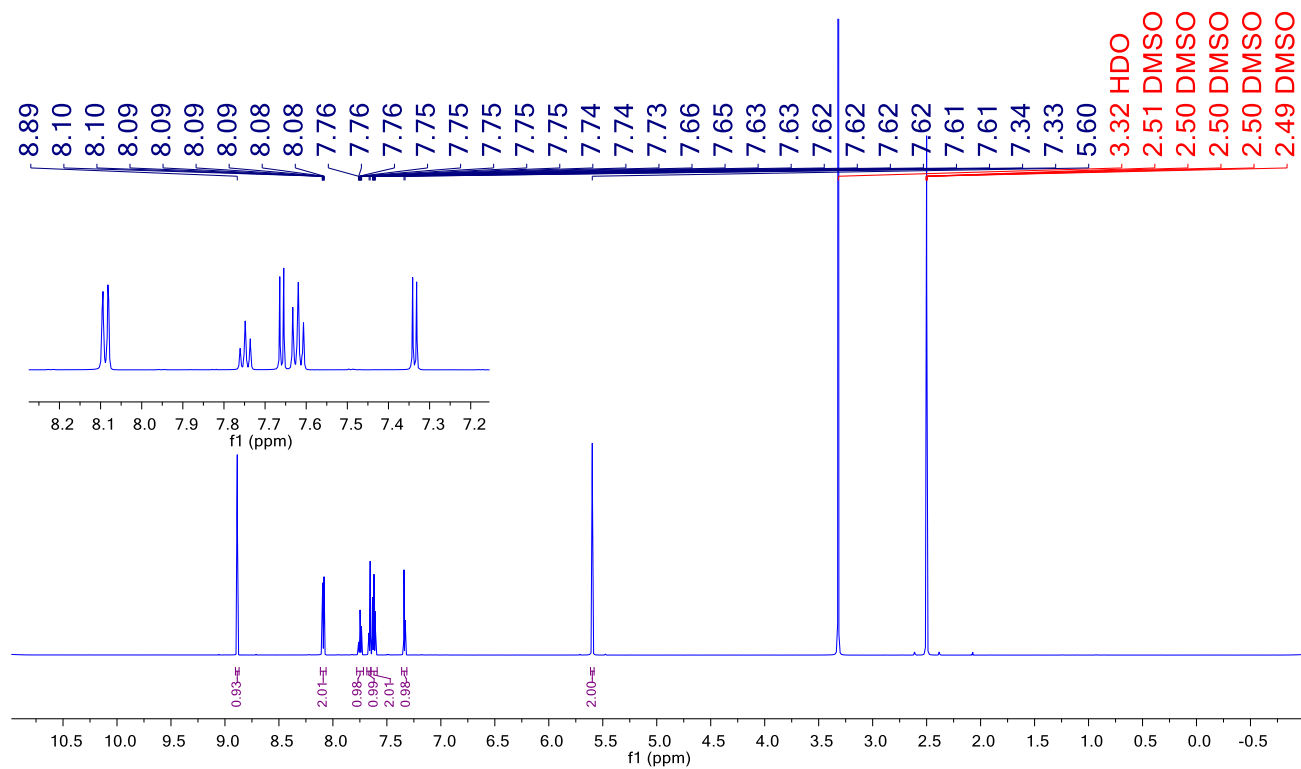

## 2-Nitro-7-(2-oxo-2-phenylethyl)imidazo[1,2-a]pyrazin-8(7H)-one (17a)

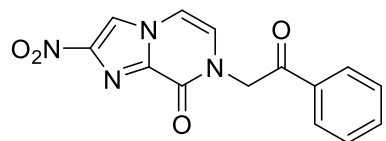

### <sup>13</sup>C NMR (150 MHz, DMSO-*d*<sub>6</sub>)

| Parameter                  | Value                                       |
|----------------------------|---------------------------------------------|
| 1 Title                    | CWA8692_034_new_ppt_ACN_MeOH.2.fid          |
| 2 Origin                   | Bruker BioSpin GmbH                         |
| 3 Owner                    | nmr                                         |
| 4 Spectrometer             | spect                                       |
| 5 Solvent                  | DMSO                                        |
| 6 Temperature              | 298.0                                       |
| 7 Pulse Sequence           | jmod                                        |
| 8 Experiment               | JMOD                                        |
| 9 Probe                    | Z129649_0009 (CP TCI 600S3 H&F-C/ N-D-05 Z) |
| 10 Number of Scans         | 10000                                       |
| 11 Receiver Gain           | 191.6                                       |
| 12 Relaxation Delay        | 1.0000                                      |
| 13 Pulse Width             | 11.5000                                     |
| 14 Presaturation Frequency |                                             |
| 15 Acquisition Time        | 0.8738                                      |
| 16 Acquisition Date        | 2017-10-10T07:39:28                         |
| 17 Modification Date       | 2017-10-10T07:39:28                         |
| 18 Spectrometer Frequency  | 150.92                                      |
| 19 Spectral Width          | 37500.0                                     |
| 20 Lowest Frequency        | -2151.2                                     |
| 21 Nucleus                 | 13C                                         |
| 22 Acquired Size           | 32768                                       |
| 23 Spectral Size           | 65536                                       |

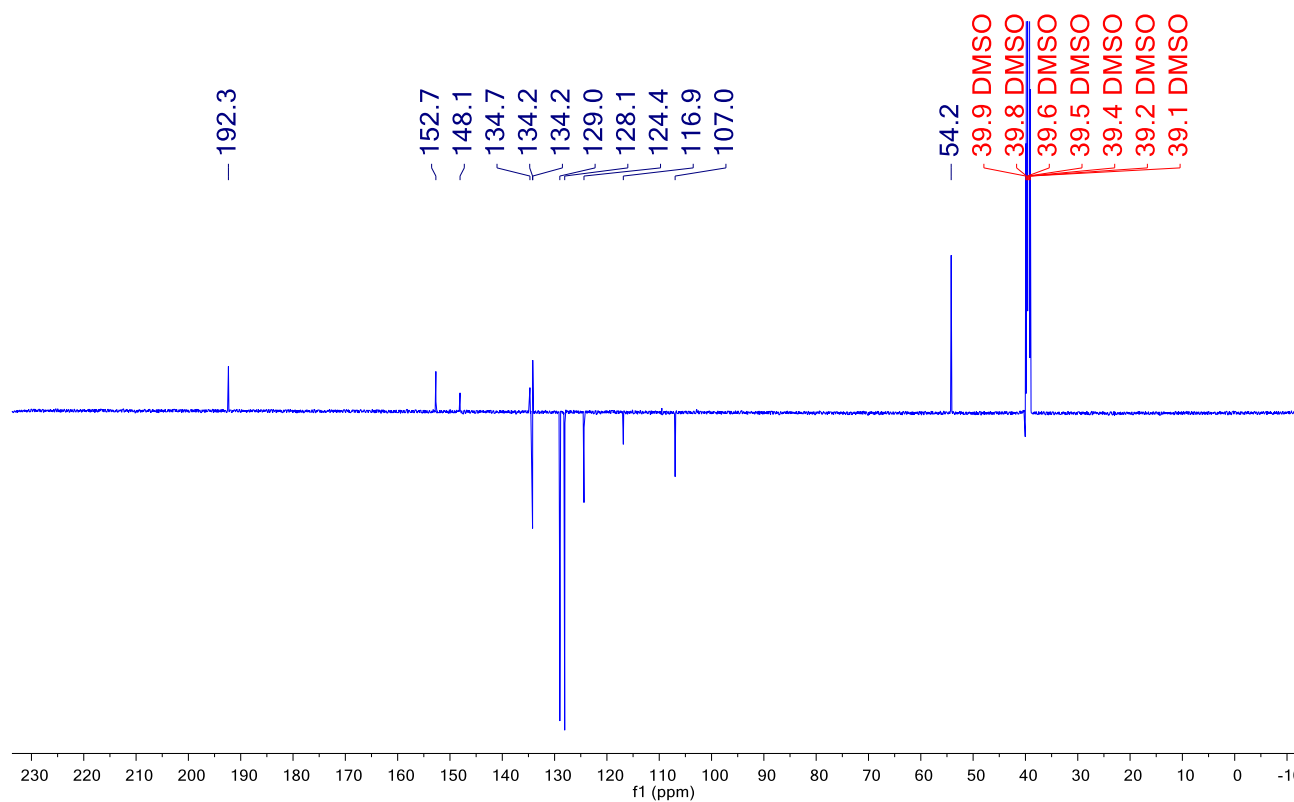

## 2-Nitro-7-(2-oxo-2-(4-(trifluoromethoxy)phenyl)ethyl)imidazo[1,2-a]pyrazin-8(7H)-one (17b)

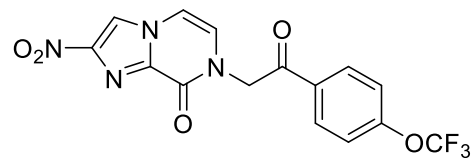

### <sup>1</sup>H NMR (600 MHz, DMSO-d<sub>6</sub>)

| Parameter                  | Value                                          |
|----------------------------|------------------------------------------------|
| 1 Title                    | CWA8692_088_ppt_ACN_MeOH.1.fid                 |
| 2 Origin                   | Bruker BioSpin GmbH                            |
| 3 Owner                    | nmr                                            |
| 4 Spectrometer             | spect                                          |
| 5 Solvent                  | DMSO                                           |
| 6 Temperature              | 298.0                                          |
| 7 Pulse Sequence           | zg                                             |
| 8 Experiment               | 1D                                             |
| 9 Probe                    | Z129649_0009 (CP TCI 600S3 H&F-C/<br>N-D-05 Z) |
| 10 Number of Scans         | 16                                             |
| 11 Receiver Gain           | 155.2                                          |
| 12 Relaxation Delay        | 5.0000                                         |
| 13 Pulse Width             | 7.0100                                         |
| 14 Presaturation Frequency |                                                |
| 15 Acquisition Time        | 2.2807                                         |
| 16 Acquisition Date        | 2017-10-04T12:02:56                            |
| 17 Modification Date       | 2017-10-04T12:02:56                            |
| 18 Spectrometer Frequency  | 600.13                                         |
| 19 Spectral Width          | 7183.9                                         |
| 20 Lowest Frequency        | -591.3                                         |
| 21 Nucleus                 | <sup>1</sup> H                                 |
| 22 Acquired Size           | 16384                                          |
| 23 Spectral Size           | 65536                                          |

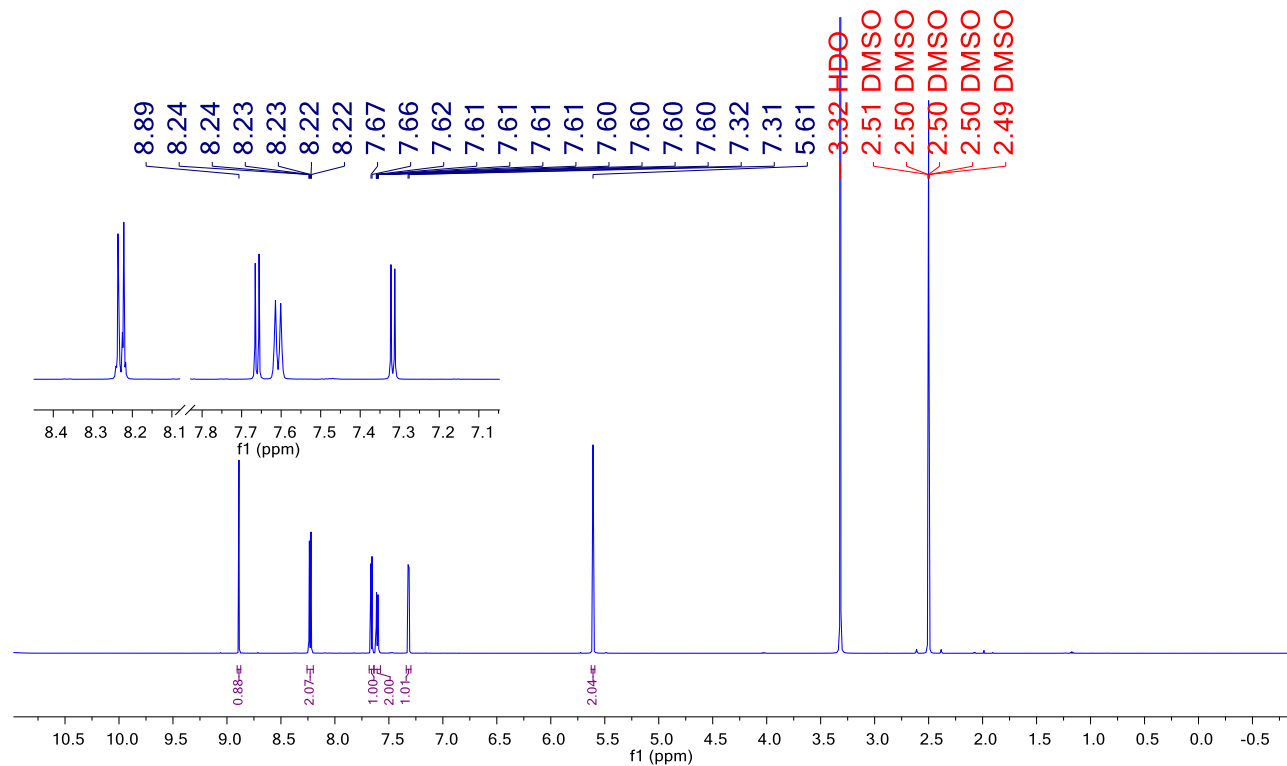



## 2-Nitro-7-(2-oxo-2-(4-(trifluoromethoxy)phenyl)ethyl)imidazo[1,2-a]pyrazin-8(7H)-one (17b)



### <sup>13</sup>C NMR (150 MHz, DMSO-d<sub>6</sub>)

| Parameter                  | Value                                          |
|----------------------------|------------------------------------------------|
| 1 Title                    | CWA8692_088_ppt_ACN_MeOH.2.fid                 |
| 2 Origin                   | Bruker BioSpin GmbH                            |
| 3 Owner                    | nmr                                            |
| 4 Spectrometer             | spect                                          |
| 5 Solvent                  | DMSO                                           |
| 6 Temperature              | 298.0                                          |
| 7 Pulse Sequence           | jmod                                           |
| 8 Experiment               | JMOD                                           |
| 9 Probe                    | Z129649_0009 (CP TCI 600S3 H&F-C/<br>N-D-05 Z) |
| 10 Number of Scans         | 5800                                           |
| 11 Receiver Gain           | 191.6                                          |
| 12 Relaxation Delay        | 1.0000                                         |
| 13 Pulse Width             | 11.5000                                        |
| 14 Presaturation Frequency |                                                |
| 15 Acquisition Time        | 0.8738                                         |
| 16 Acquisition Date        | 2017-10-04T17:17:55                            |
| 17 Modification Date       | 2017-10-04T17:17:55                            |
| 18 Spectrometer Frequency  | 150.92                                         |
| 19 Spectral Width          | 37500.0                                        |
| 20 Lowest Frequency        | -2151.2                                        |
| 21 Nucleus                 | <sup>13</sup> C                                |
| 22 Acquired Size           | 32768                                          |
| 23 Spectral Size           | 65536                                          |

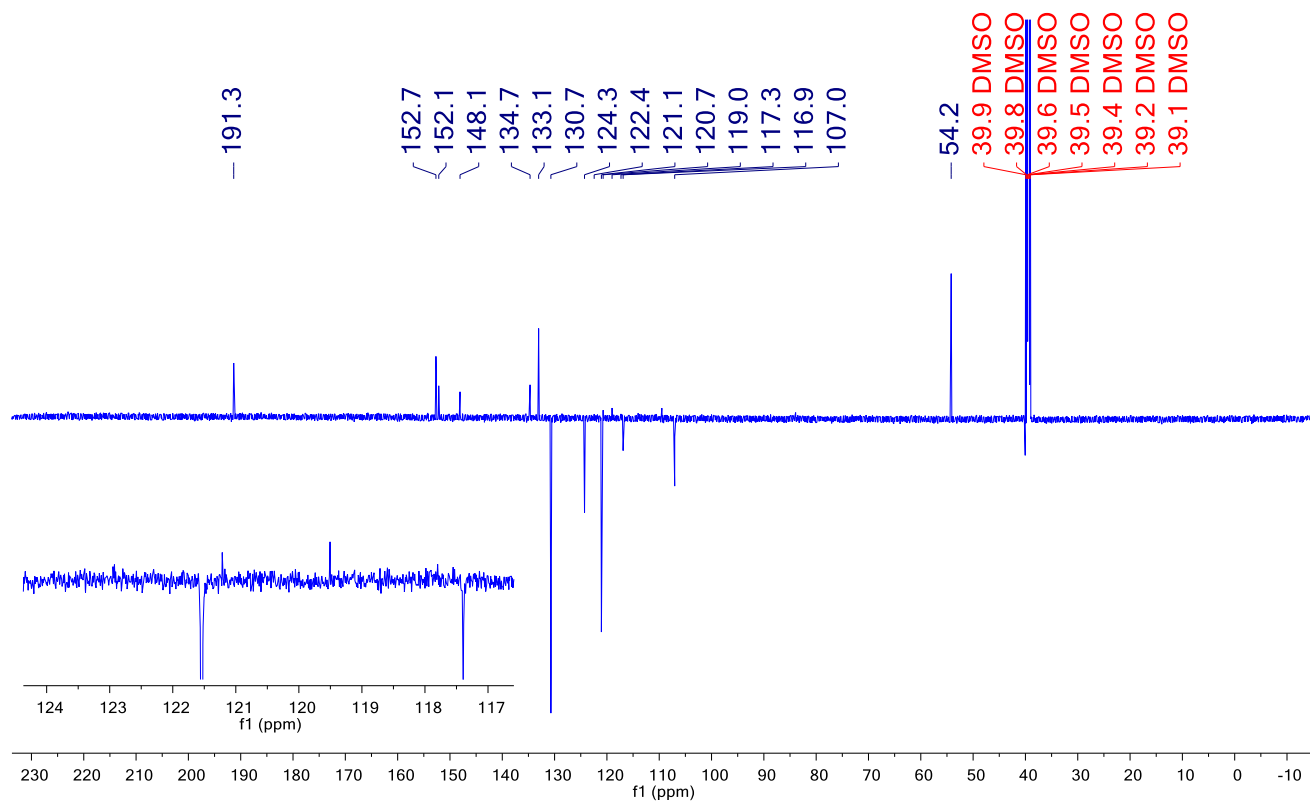

## 2-Nitro-7-(2-oxo-2-(*p*-tolyl)ethyl)imidazo[1,2-*a*]pyrazin-8(7*H*)-one (17c)

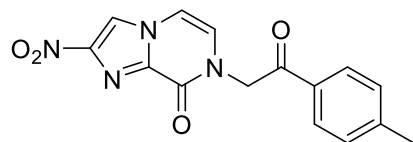

### <sup>1</sup>H NMR (600 MHz, DMSO-*d*<sub>6</sub>)

| Parameter                  | Value                                          |
|----------------------------|------------------------------------------------|
| 1 Title                    | CWA8692_072_ppt_ACN_MeOH.2.fid                 |
| 2 Origin                   | Bruker BioSpin GmbH                            |
| 3 Owner                    | nmr                                            |
| 4 Spectrometer             | spect                                          |
| 5 Solvent                  | DMSO                                           |
| 6 Temperature              | 298.0                                          |
| 7 Pulse Sequence           | zg                                             |
| 8 Experiment               | 1D                                             |
| 9 Probe                    | Z129649_0009 (CP TCI 600S3 H&F-C/<br>N-D-05 Z) |
| 10 Number of Scans         | 16                                             |
| 11 Receiver Gain           | 172.8                                          |
| 12 Relaxation Delay        | 5.0000                                         |
| 13 Pulse Width             | 7.0100                                         |
| 14 Presaturation Frequency |                                                |
| 15 Acquisition Time        | 2.2807                                         |
| 16 Acquisition Date        | 2017-09-28T17:11:06                            |
| 17 Modification Date       | 2017-09-28T17:11:06                            |
| 18 Spectrometer Frequency  | 600.13                                         |
| 19 Spectral Width          | 7183.9                                         |
| 20 Lowest Frequency        | -591.3                                         |
| 21 Nucleus                 | <sup>1</sup> H                                 |
| 22 Acquired Size           | 16384                                          |
| 23 Spectral Size           | 65536                                          |

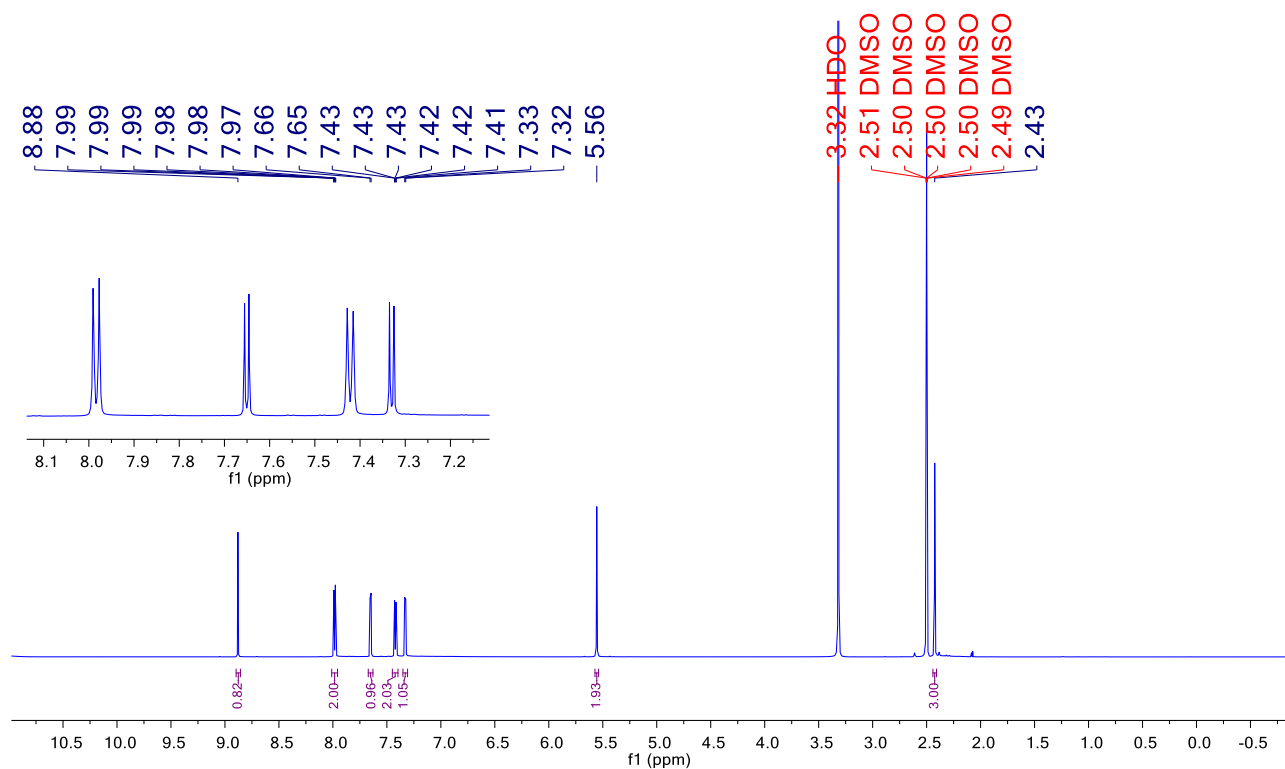

## 2-Nitro-7-(2-oxo-2-(*p*-tolyl)ethyl)imidazo[1,2-*a*]pyrazin-8(7*H*)-one (17c)



### <sup>13</sup>C NMR (150 MHz, DMSO-*d*<sub>6</sub>)

| Parameter                  | Value                                          |
|----------------------------|------------------------------------------------|
| 1 Title                    | CWA8692_072_ppt_ACN_MeOH.3.fid                 |
| 2 Origin                   | Bruker BioSpin GmbH                            |
| 3 Owner                    | nmr                                            |
| 4 Spectrometer             | spect                                          |
| 5 Solvent                  | DMSO                                           |
| 6 Temperature              | 298.0                                          |
| 7 Pulse Sequence           | jmod                                           |
| 8 Experiment               | JMOD                                           |
| 9 Probe                    | Z129649_0009 (CP TCI 600S3 H&F-C/<br>N-D-05 Z) |
| 10 Number of Scans         | 10000                                          |
| 11 Receiver Gain           | 191.6                                          |
| 12 Relaxation Delay        | 1.0000                                         |
| 13 Pulse Width             | 11.5000                                        |
| 14 Presaturation Frequency |                                                |
| 15 Acquisition Time        | 0.8738                                         |
| 16 Acquisition Date        | 2017-09-28T22:32:10                            |
| 17 Modification Date       | 2017-09-28T22:32:10                            |
| 18 Spectrometer Frequency  | 150.92                                         |
| 19 Spectral Width          | 37500.0                                        |
| 20 Lowest Frequency        | -2151.2                                        |
| 21 Nucleus                 | <sup>13</sup> C                                |
| 22 Acquired Size           | 32768                                          |
| 23 Spectral Size           | 65536                                          |

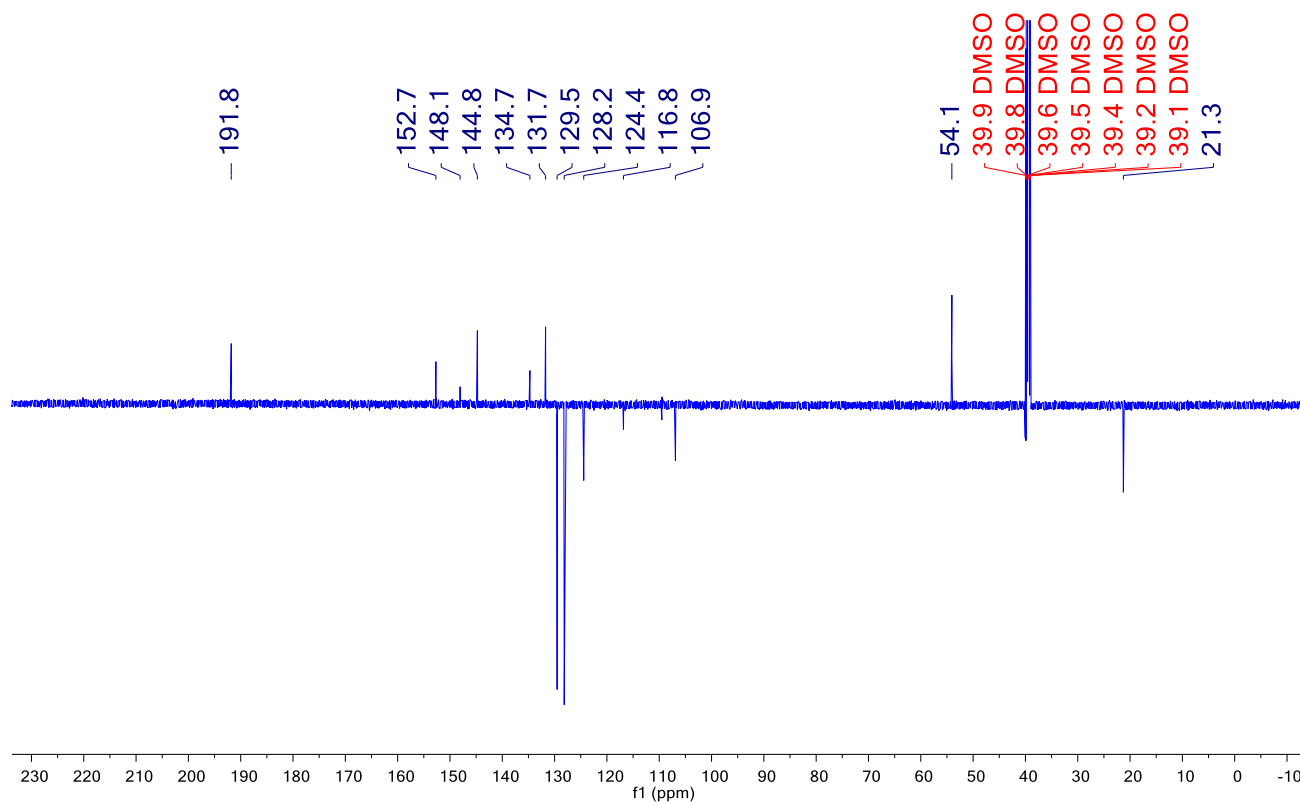

## 2-(2-Nitro-8-oxoimidazo[1,2-a]pyrazin-7(8H)-yl)-N-phenylacetamide (17d)

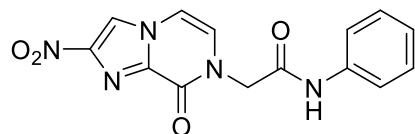

### <sup>1</sup>H NMR (600 MHz, DMSO-d<sub>6</sub>)

| Parameter                  | Value                                          |
|----------------------------|------------------------------------------------|
| 1 Title                    | CWA8692_039_combined_ppt<br>_ACN_MeOH.1.fid    |
| 2 Origin                   | Bruker BioSpin GmbH                            |
| 3 Owner                    | nmr                                            |
| 4 Spectrometer             | spect                                          |
| 5 Solvent                  | DMSO                                           |
| 6 Temperature              | 298.0                                          |
| 7 Pulse Sequence           | zg                                             |
| 8 Experiment               | 1D                                             |
| 9 Probe                    | Z129649_0009 (CP TCI 600S3<br>H&F-C/ N-D-05 Z) |
| 10 Number of Scans         | 16                                             |
| 11 Receiver Gain           | 59.7                                           |
| 12 Relaxation Delay        | 5.0000                                         |
| 13 Pulse Width             | 7.0100                                         |
| 14 Presaturation Frequency |                                                |
| 15 Acquisition Time        | 1.9464                                         |
| 16 Acquisition Date        | 2017-09-21T18:49:11                            |
| 17 Modification Date       | 2017-09-21T18:49:11                            |
| 18 Spectrometer Frequency  | 600.13                                         |
| 19 Spectral Width          | 8417.5                                         |
| 20 Lowest Frequency        | -1208.1                                        |
| 21 Nucleus                 | <sup>1</sup> H                                 |
| 22 Acquired Size           | 16384                                          |
| 23 Spectral Size           | 65536                                          |

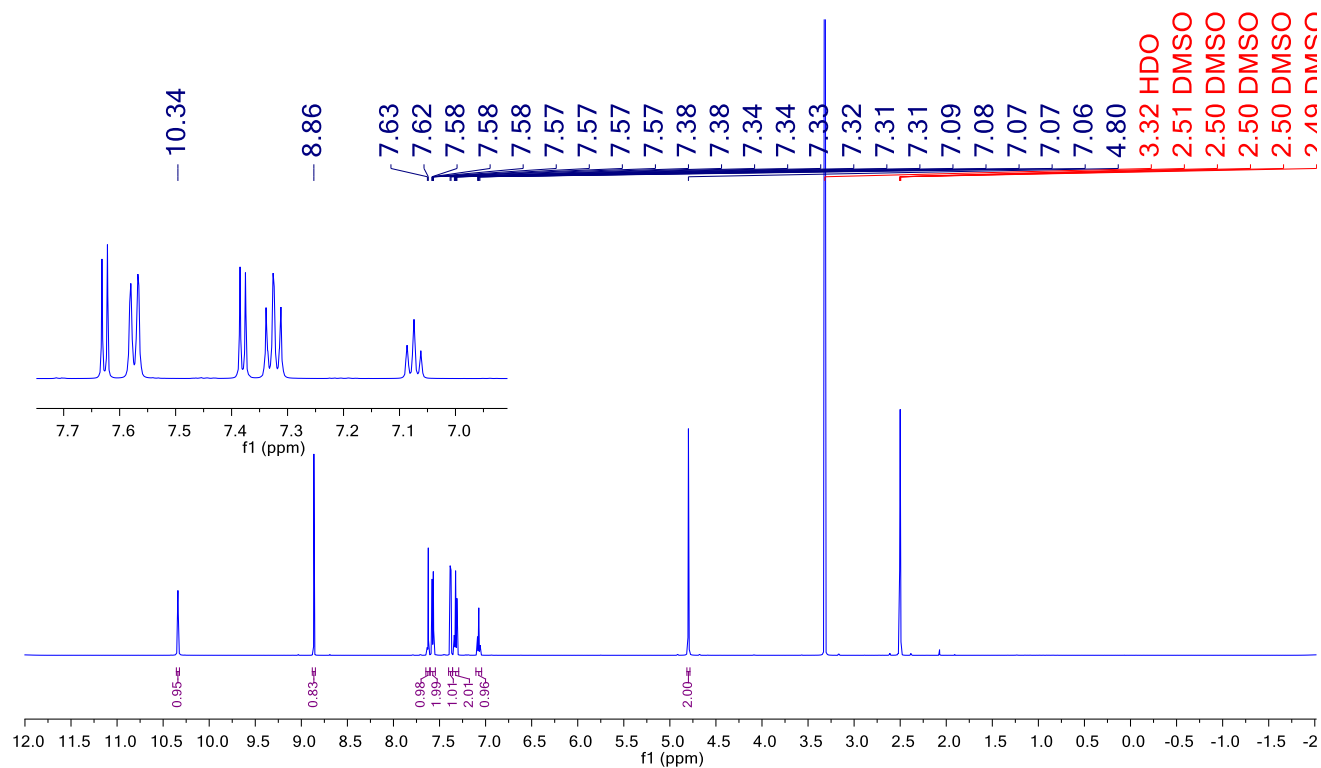

## 2-(2-Nitro-8-oxoimidazo[1,2-a]pyrazin-7(8H)-yl)-N-phenylacetamide (17d)



### <sup>13</sup>C NMR (150 MHz, DMSO-*d*<sub>6</sub>)

| Parameter                  | Value                                       |
|----------------------------|---------------------------------------------|
| 1 Title                    | CWA8692_039_combined_ppt_ACN_MeOH.3.fid     |
| 2 Origin                   | Bruker BioSpin GmbH                         |
| 3 Owner                    | nmr                                         |
| 4 Spectrometer             | spect                                       |
| 5 Solvent                  | DMSO                                        |
| 6 Temperature              | 298.0                                       |
| 7 Pulse Sequence           | jmod                                        |
| 8 Experiment               | JMOD                                        |
| 9 Probe                    | Z129649_0009 (CP TCI 600S3 H&F-C/ N-D-05 Z) |
| 10 Number of Scans         | 7500                                        |
| 11 Receiver Gain           | 191.6                                       |
| 12 Relaxation Delay        | 1.0000                                      |
| 13 Pulse Width             | 11.5000                                     |
| 14 Presaturation Frequency |                                             |
| 15 Acquisition Time        | 0.8738                                      |
| 16 Acquisition Date        | 2017-09-21T23:01:27                         |
| 17 Modification Date       | 2017-09-21T23:01:27                         |
| 18 Spectrometer Frequency  | 150.92                                      |
| 19 Spectral Width          | 37500.0                                     |
| 20 Lowest Frequency        | -2151.2                                     |
| 21 Nucleus                 | <sup>13</sup> C                             |
| 22 Acquired Size           | 32768                                       |
| 23 Spectral Size           | 65536                                       |

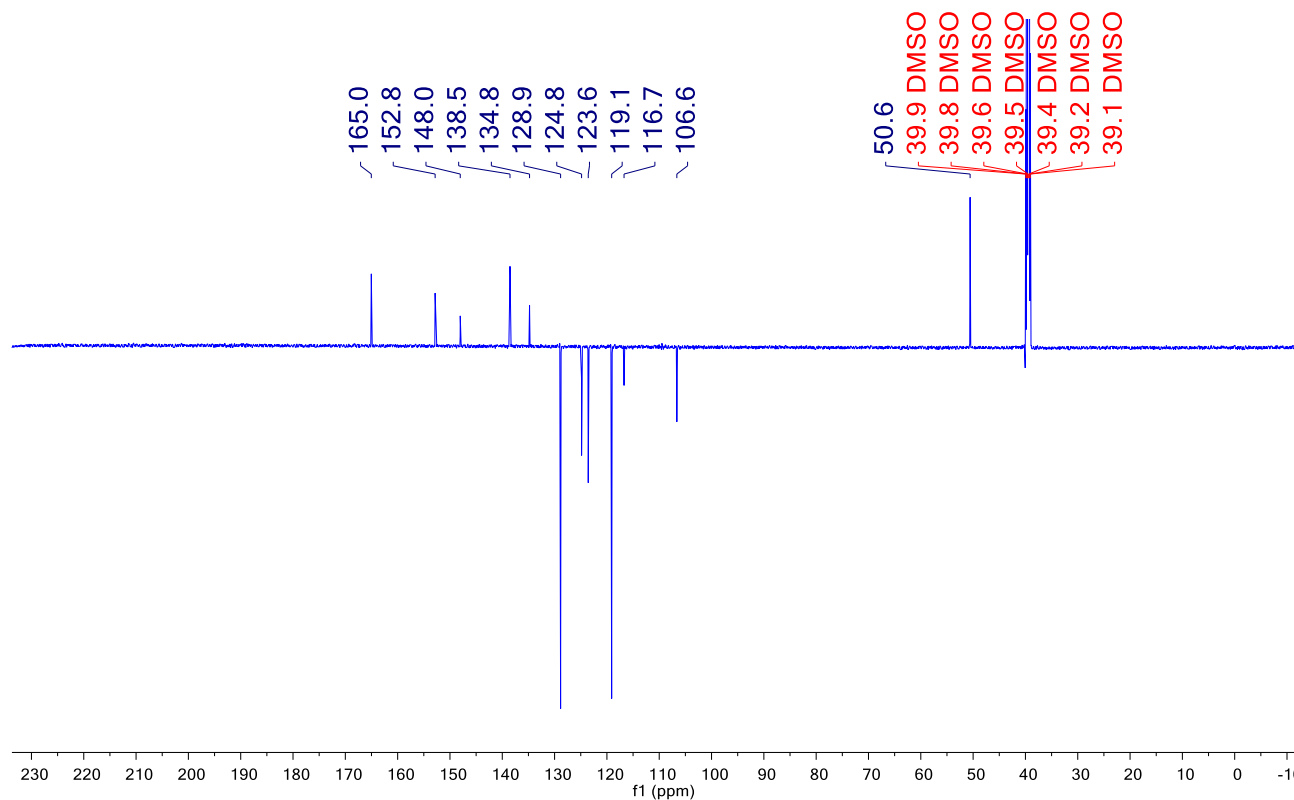

### *N*-Benzyl-2-(2-nitro-8-oxoimidazo[1,2-*a*]pyrazin-7(8*H*)-yl)acetamide (17e)

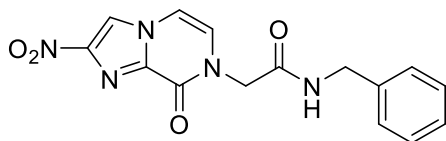

### <sup>1</sup>H NMR (600 MHz, DMSO-*d*<sub>6</sub>)

| Parameter                  | Value                                       |
|----------------------------|---------------------------------------------|
| 1 Title                    | CWA8692_062_ppt.1.fid                       |
| 2 Origin                   | Bruker BioSpin GmbH                         |
| 3 Owner                    | nmr                                         |
| 4 Spectrometer             | spect                                       |
| 5 Solvent                  | DMSO                                        |
| 6 Temperature              | 298.0                                       |
| 7 Pulse Sequence           | zg                                          |
| 8 Experiment               | 1D                                          |
| 9 Probe                    | Z129649_0009 (CP TCI 600S3 H&F-C/ N-D-05 Z) |
| 10 Number of Scans         | 32                                          |
| 11 Receiver Gain           | 140.4                                       |
| 12 Relaxation Delay        | 5.0000                                      |
| 13 Pulse Width             | 7.0100                                      |
| 14 Presaturation Frequency |                                             |
| 15 Acquisition Time        | 1.9464                                      |
| 16 Acquisition Date        | 2017-09-17T13:21:29                         |
| 17 Modification Date       | 2017-09-17T13:21:29                         |
| 18 Spectrometer Frequency  | 600.13                                      |
| 19 Spectral Width          | 8417.5                                      |
| 20 Lowest Frequency        | -1208.1                                     |
| 21 Nucleus                 | <sup>1</sup> H                              |
| 22 Acquired Size           | 16384                                       |
| 23 Spectral Size           | 65536                                       |

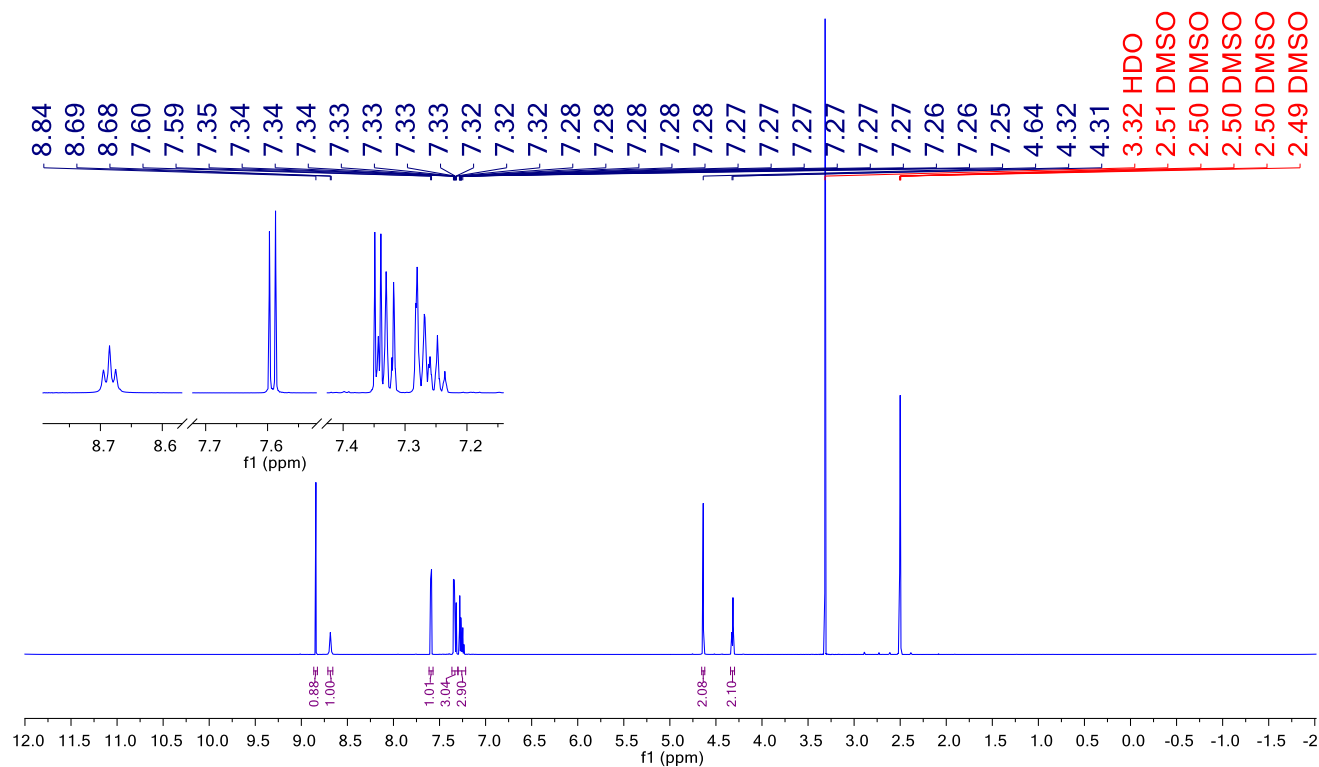

### *N*-Benzyl-2-(2-nitro-8-oxoimidazo[1,2-*a*]pyrazin-7(8*H*)-yl)acetamide (17e)

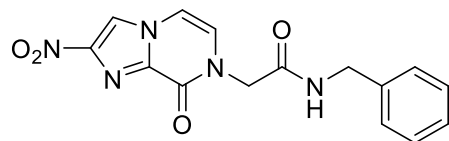

### <sup>13</sup>C NMR (150 MHz, DMSO-*d*<sub>6</sub>)

| Parameter                  | Value                                       |
|----------------------------|---------------------------------------------|
| 1 Title                    | CWA8692_062_ppt.2.fid                       |
| 2 Origin                   | Bruker BioSpin GmbH                         |
| 3 Owner                    | nmr                                         |
| 4 Spectrometer             | spect                                       |
| 5 Solvent                  | DMSO                                        |
| 6 Temperature              | 298.0                                       |
| 7 Pulse Sequence           | jmod                                        |
| 8 Experiment               | JMOD                                        |
| 9 Probe                    | Z129649_0009 (CP TCI 600S3 H&F-C/ N-D-05 Z) |
| 10 Number of Scans         | 7000                                        |
| 11 Receiver Gain           | 191.6                                       |
| 12 Relaxation Delay        | 1.0000                                      |
| 13 Pulse Width             | 11.5000                                     |
| 14 Presaturation Frequency |                                             |
| 15 Acquisition Time        | 0.8738                                      |
| 16 Acquisition Date        | 2017-09-17T17:15:58                         |
| 17 Modification Date       | 2017-09-17T17:15:58                         |
| 18 Spectrometer Frequency  | 150.92                                      |
| 19 Spectral Width          | 37500.0                                     |
| 20 Lowest Frequency        | -2151.2                                     |
| 21 Nucleus                 | <sup>13</sup> C                             |
| 22 Acquired Size           | 32768                                       |
| 23 Spectral Size           | 65536                                       |

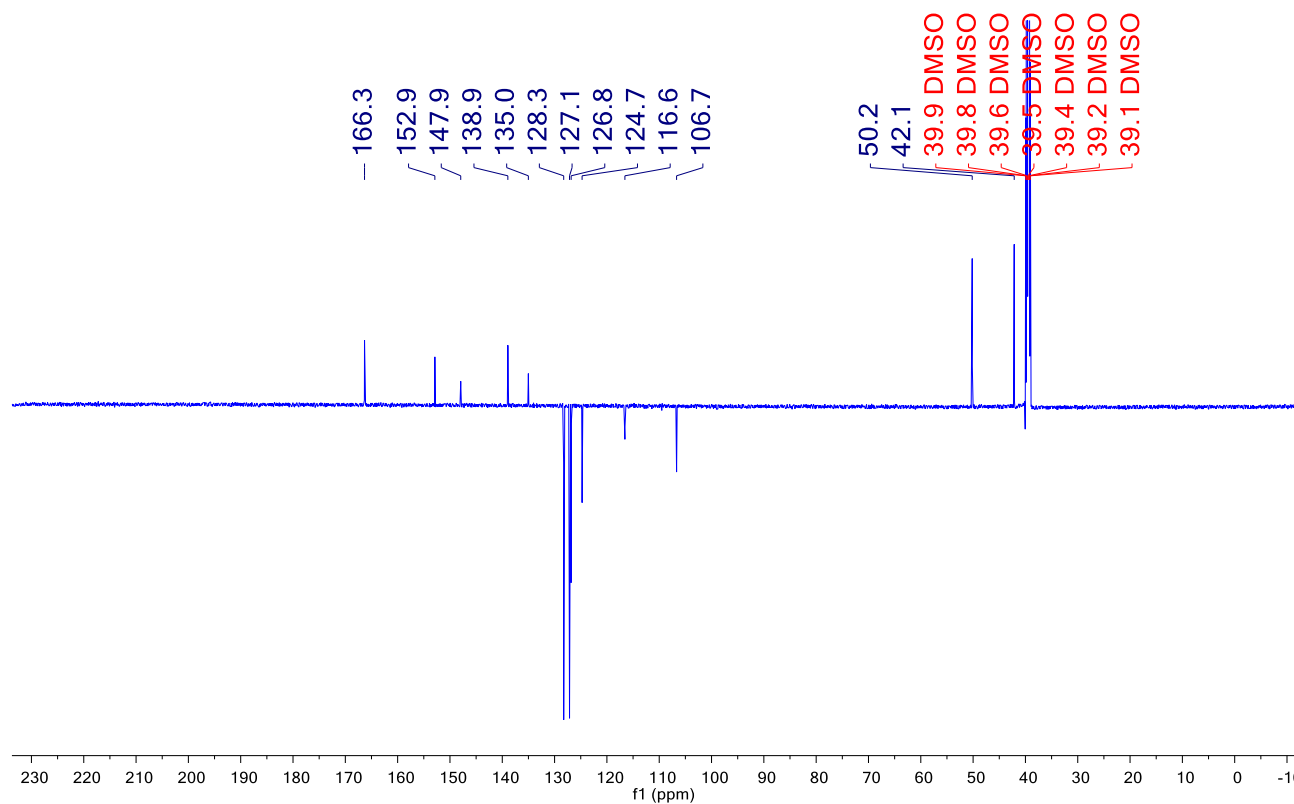

**2-(2-Nitro-8-oxoimidazo[1,2-a]pyrazin-7(8H)-yl)-N-(3-(trifluoromethoxy)benzyl)acetamide (17f)**

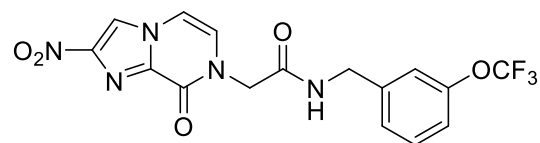

**<sup>1</sup>H NMR (600 MHz, DMSO-*d*<sub>6</sub>)**

| Parameter                  | Value                                       |
|----------------------------|---------------------------------------------|
| 1 Title                    | CWA8692_111_ppt_ACN.1.fid                   |
| 2 Origin                   | Bruker BioSpin GmbH                         |
| 3 Owner                    | nmr                                         |
| 4 Spectrometer             | spect                                       |
| 5 Solvent                  | DMSO                                        |
| 6 Temperature              | 298.0                                       |
| 7 Pulse Sequence           | zg                                          |
| 8 Experiment               | 1D                                          |
| 9 Probe                    | Z129649_0009 (CP TCI 600S3 H&F-C/ N-D-05 Z) |
| 10 Number of Scans         | 32                                          |
| 11 Receiver Gain           | 116.1                                       |
| 12 Relaxation Delay        | 5.0000                                      |
| 13 Pulse Width             | 7.0100                                      |
| 14 Presaturation Frequency |                                             |
| 15 Acquisition Time        | 1.9464                                      |
| 16 Acquisition Date        | 2017-10-14T16:29:47                         |
| 17 Modification Date       | 2017-10-14T16:29:47                         |
| 18 Spectrometer Frequency  | 600.13                                      |
| 19 Spectral Width          | 8417.5                                      |
| 20 Lowest Frequency        | -1208.1                                     |
| 21 Nucleus                 | <sup>1</sup> H                              |
| 22 Acquired Size           | 16384                                       |
| 23 Spectral Size           | 65536                                       |

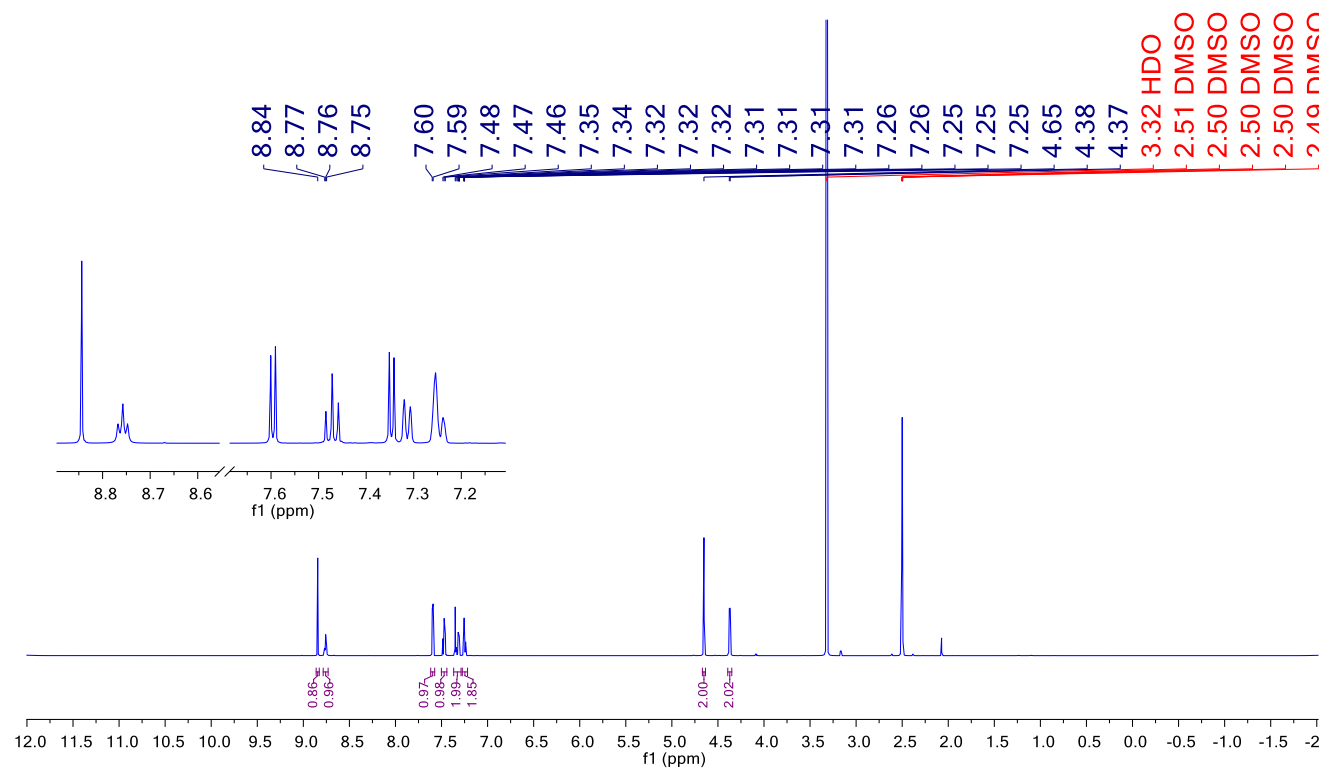



## 2-(2-Nitro-8-oxoimidazo[1,2-a]pyrazin-7(8H)-yl)-N-(3-(trifluoromethoxy)benzyl)acetamide (17f)

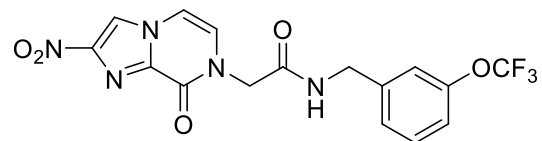

### <sup>13</sup>C NMR (150 MHz, DMSO-*d*<sub>6</sub>)

| Parameter                  | Value                                       |
|----------------------------|---------------------------------------------|
| 1 Title                    | CWA8692_111_ppt_ACN.3.fid                   |
| 2 Origin                   | Bruker BioSpin GmbH                         |
| 3 Owner                    | nmr                                         |
| 4 Spectrometer             | spect                                       |
| 5 Solvent                  | DMSO                                        |
| 6 Temperature              | 298.0                                       |
| 7 Pulse Sequence           | jmod                                        |
| 8 Experiment               | JMOD                                        |
| 9 Probe                    | Z129649_0009 (CP TCI 600S3 H&F-C/ N-D-05 Z) |
| 10 Number of Scans         | 10000                                       |
| 11 Receiver Gain           | 191.6                                       |
| 12 Relaxation Delay        | 1.0000                                      |
| 13 Pulse Width             | 11.5000                                     |
| 14 Presaturation Frequency |                                             |
| 15 Acquisition Time        | 0.8738                                      |
| 16 Acquisition Date        | 2017-10-18T22:58:00                         |
| 17 Modification Date       | 2017-10-18T22:58:00                         |
| 18 Spectrometer Frequency  | 150.92                                      |
| 19 Spectral Width          | 37500.0                                     |
| 20 Lowest Frequency        | -2151.2                                     |
| 21 Nucleus                 | <sup>13</sup> C                             |
| 22 Acquired Size           | 32768                                       |
| 23 Spectral Size           | 65536                                       |

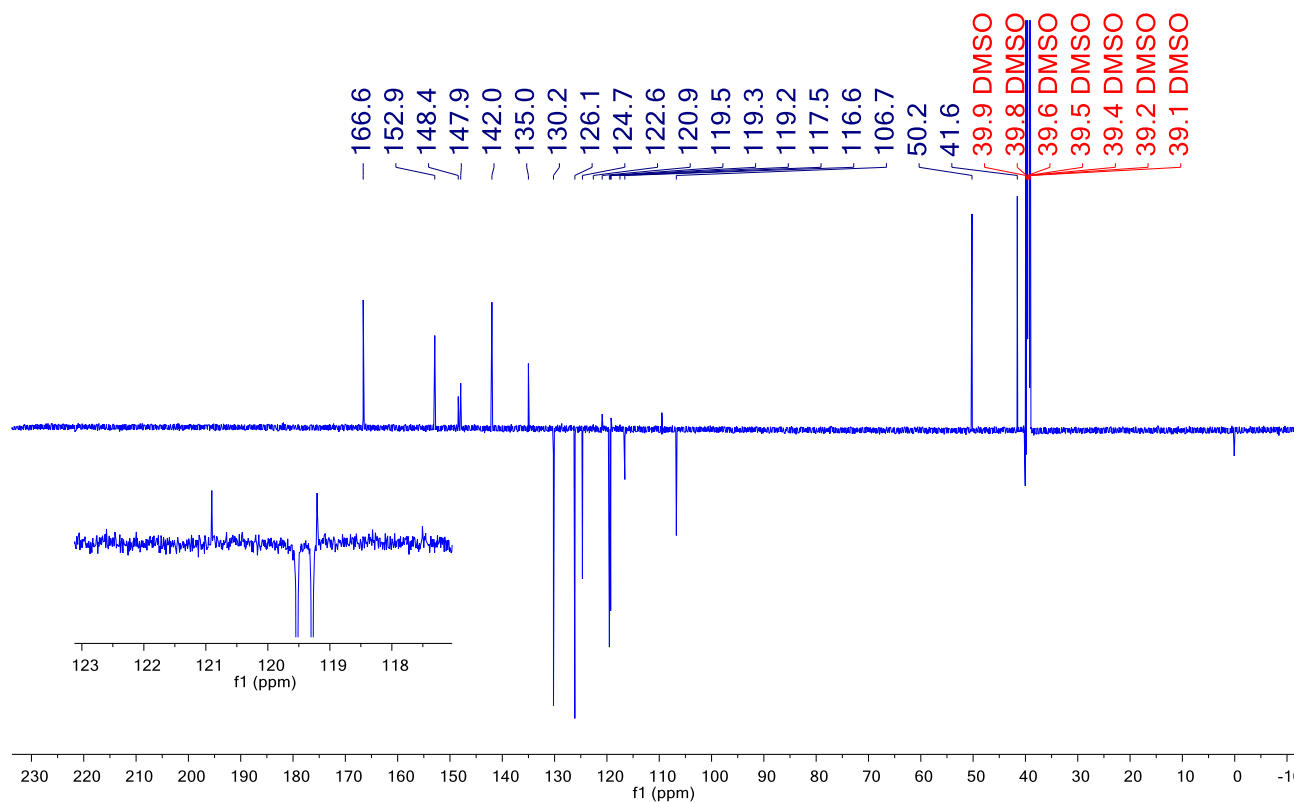

2-(2-Nitro-8-oxoimidazo[1,2-a]pyrazin-7(8H)-yl)ethyl acetate (17g)

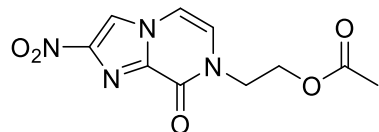

<sup>1</sup>H NMR (600 MHz, DMSO-d<sub>6</sub>)

| Parameter                  | Value                                       |
|----------------------------|---------------------------------------------|
| 1 Title                    | CWA8412_082_crude.1.fid                     |
| 2 Origin                   | Bruker BioSpin GmbH                         |
| 3 Owner                    | nmr                                         |
| 4 Spectrometer             | spect                                       |
| 5 Solvent                  | DMSO                                        |
| 6 Temperature              | 298.0                                       |
| 7 Pulse Sequence           | zg                                          |
| 8 Experiment               | 1D                                          |
| 9 Probe                    | Z129649_0009 (CP TCI 600S3 H&F-C/ N-D-05 Z) |
| 10 Number of Scans         | 16                                          |
| 11 Receiver Gain           | 109.3                                       |
| 12 Relaxation Delay        | 5.0000                                      |
| 13 Pulse Width             | 7.0100                                      |
| 14 Presaturation Frequency |                                             |
| 15 Acquisition Time        | 2.2807                                      |
| 16 Acquisition Date        | 2017-06-01T10:13:19                         |
| 17 Modification Date       | 2017-06-01T10:13:19                         |
| 18 Spectrometer Frequency  | 600.13                                      |
| 19 Spectral Width          | 7183.9                                      |
| 20 Lowest Frequency        | -592.6                                      |
| 21 Nucleus                 | 1H                                          |
| 22 Acquired Size           | 16384                                       |
| 23 Spectral Size           | 65536                                       |

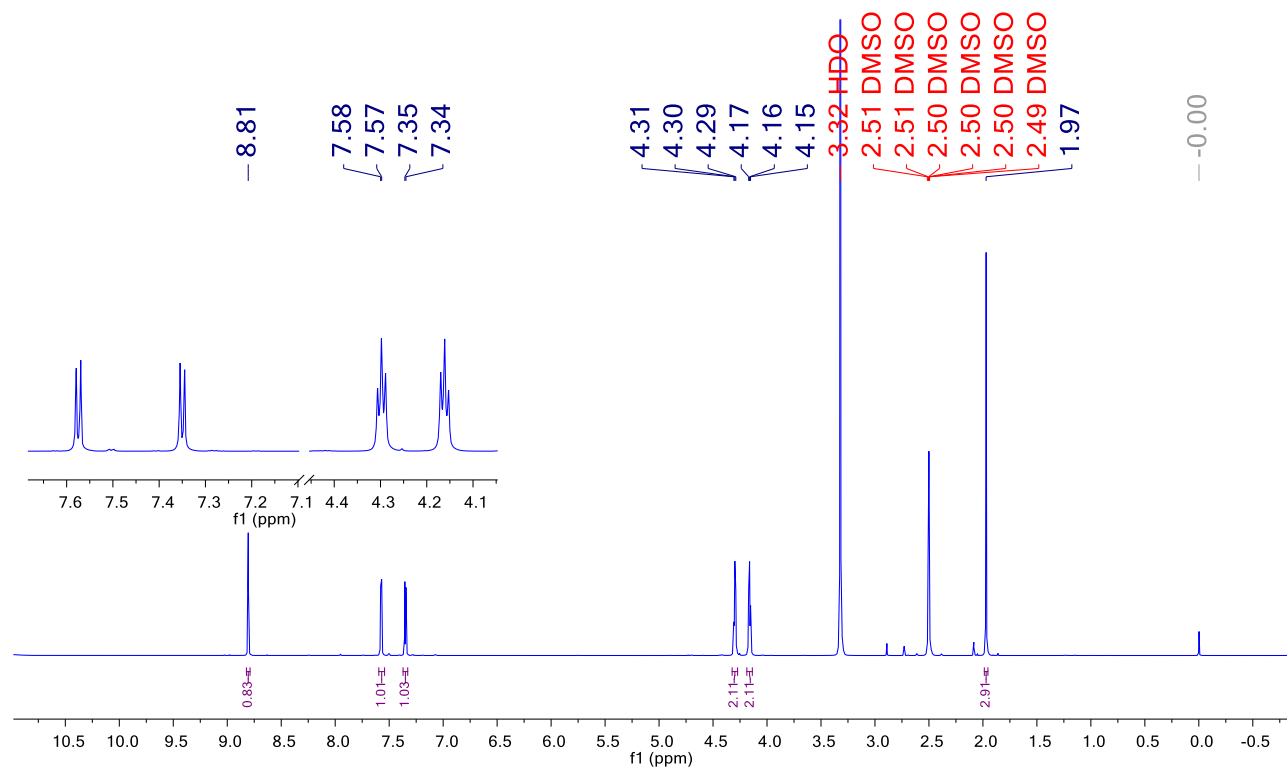

## 2-(2-Nitro-8-oxoimidazo[1,2-a]pyrazin-7(8H)-yl)ethyl acetate (17g)



### $^{13}\text{C}$ NMR (150 MHz, $\text{DMSO}-d_6$ )

| Parameter                     | Value                                          |
|-------------------------------|------------------------------------------------|
| 1 Title                       | CWA8412_082_crude.2.fid                        |
| 2 Origin                      | Bruker BioSpin GmbH                            |
| 3 Owner                       | nmr                                            |
| 4 Spectrometer                | spect                                          |
| 5 Solvent                     | DMSO                                           |
| 6 Temperature                 | 298.0                                          |
| 7 Pulse Sequence              | zgpg                                           |
| 8 Experiment                  | 1D                                             |
| 9 Probe                       | Z129649_0009 (CP TCI 600S3<br>H&F-C/ N-D-05 Z) |
| 10 Number of Scans            | 2560                                           |
| 11 Receiver Gain              | 191.6                                          |
| 12 Relaxation Delay           | 1.0000                                         |
| 13 Pulse Width                | 11.5000                                        |
| 14 Presaturation<br>Frequency |                                                |
| 15 Acquisition Time           | 0.9044                                         |
| 16 Acquisition Date           | 2017-06-01T11:38:16                            |
| 17 Modification Date          | 2017-06-01T11:38:16                            |
| 18 Spectrometer<br>Frequency  | 150.92                                         |
| 19 Spectral Width             | 36231.9                                        |
| 20 Lowest Frequency           | -3025.7                                        |
| 21 Nucleus                    | $^{13}\text{C}$                                |
| 22 Acquired Size              | 32768                                          |
| 23 Spectral Size              | 65536                                          |

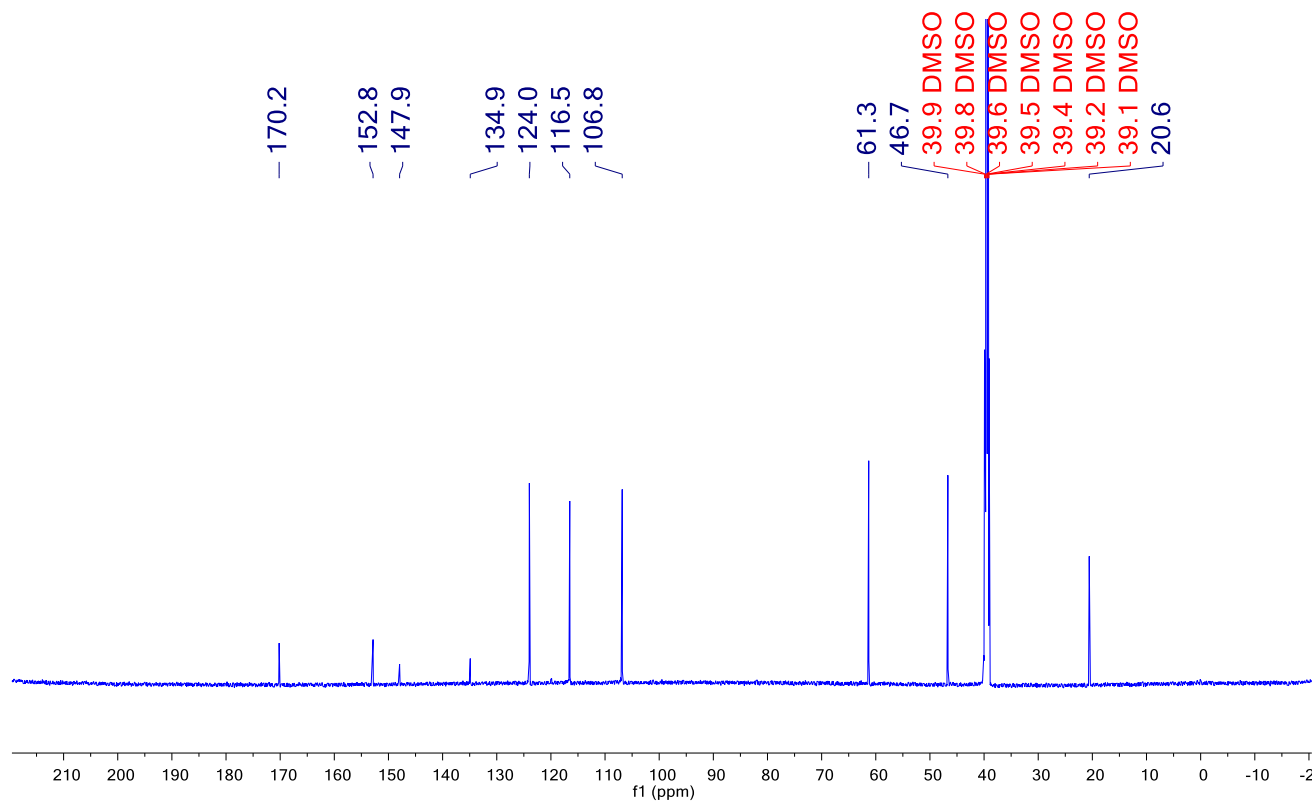

## 7-(2-Hydroxyethyl)-2-nitroimidazo[1,2-a]pyrazin-8(7H)-one (17h)

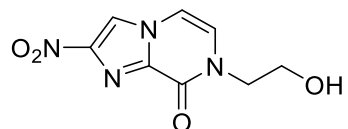

### <sup>1</sup>H NMR (600 MHz, DMSO-d<sub>6</sub>)

| Parameter                  | Value                                       |
|----------------------------|---------------------------------------------|
| 1 Title                    | CWA8412_083_purified.1.fid                  |
| 2 Origin                   | Bruker BioSpin GmbH                         |
| 3 Owner                    | nmr                                         |
| 4 Spectrometer             | spect                                       |
| 5 Solvent                  | DMSO                                        |
| 6 Temperature              | 298.0                                       |
| 7 Pulse Sequence           | zg                                          |
| 8 Experiment               | 1D                                          |
| 9 Probe                    | Z129649_0009 (CP TCI 600S3 H&F-C/ N-D-05 Z) |
| 10 Number of Scans         | 32                                          |
| 11 Receiver Gain           | 116.1                                       |
| 12 Relaxation Delay        | 5.0000                                      |
| 13 Pulse Width             | 7.0100                                      |
| 14 Presaturation Frequency |                                             |
| 15 Acquisition Time        | 1.9464                                      |
| 16 Acquisition Date        | 2017-06-06T18:17:20                         |
| 17 Modification Date       | 2017-06-06T18:17:20                         |
| 18 Spectrometer Frequency  | 600.13                                      |
| 19 Spectral Width          | 8417.5                                      |
| 20 Lowest Frequency        | -1211.0                                     |
| 21 Nucleus                 | <sup>1</sup> H                              |
| 22 Acquired Size           | 16384                                       |
| 23 Spectral Size           | 65536                                       |

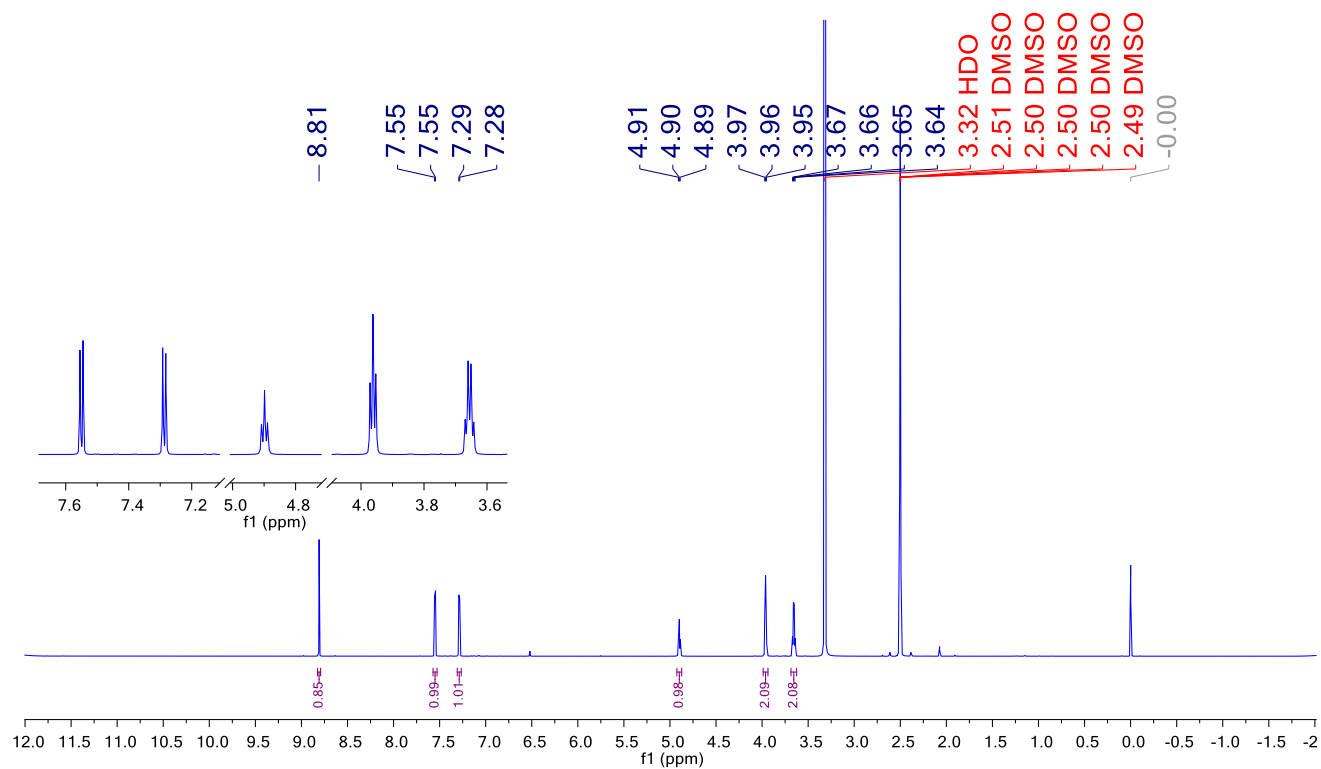

## 7-(2-Hydroxyethyl)-2-nitroimidazo[1,2-a]pyrazin-8(7H)-one (17h)

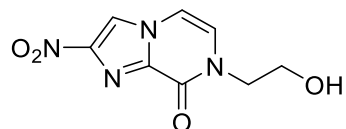

### <sup>13</sup>C NMR (150 MHz, DMSO-*d*<sub>6</sub>)

| Parameter                  | Value                                       |
|----------------------------|---------------------------------------------|
| 1 Title                    | CWA8412_083_purified.2.fid                  |
| 2 Origin                   | Bruker BioSpin GmbH                         |
| 3 Owner                    | nmr                                         |
| 4 Spectrometer             | spect                                       |
| 5 Solvent                  | DMSO                                        |
| 6 Temperature              | 298.0                                       |
| 7 Pulse Sequence           | jmod                                        |
| 8 Experiment               | JMOD                                        |
| 9 Probe                    | Z129649_0009 (CP TCI 600S3 H&F-C/ N-D-05 Z) |
| 10 Number of Scans         | 8000                                        |
| 11 Receiver Gain           | 191.6                                       |
| 12 Relaxation Delay        | 1.0000                                      |
| 13 Pulse Width             | 11.5000                                     |
| 14 Presaturation Frequency |                                             |
| 15 Acquisition Time        | 0.8738                                      |
| 16 Acquisition Date        | 2017-06-06T22:34:17                         |
| 17 Modification Date       | 2017-06-06T22:34:17                         |
| 18 Spectrometer Frequency  | 150.92                                      |
| 19 Spectral Width          | 37500.0                                     |
| 20 Lowest Frequency        | -2151.2                                     |
| 21 Nucleus                 | <sup>13</sup> C                             |
| 22 Acquired Size           | 32768                                       |
| 23 Spectral Size           | 65536                                       |

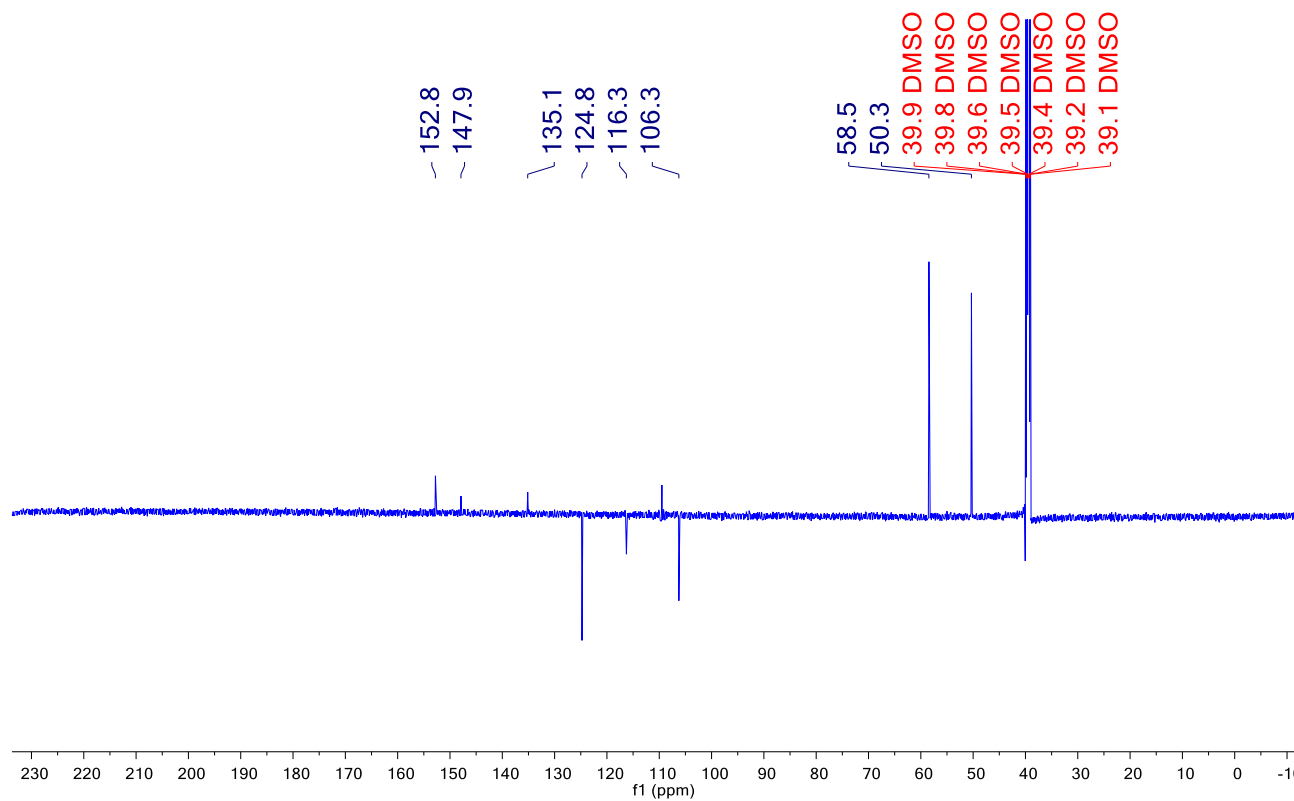

## 7-(2-(Benzyloxy)ethyl)-2-nitroimidazo[1,2-a]pyrazin-8(7H)-one (17i)

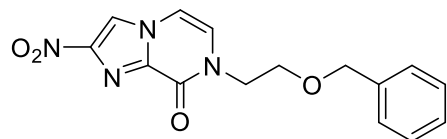

### <sup>1</sup>H NMR (600 MHz, DMSO-d<sub>6</sub>)

| Parameter                  | Value                                       |
|----------------------------|---------------------------------------------|
| 1 Title                    | CWA8412_112IIIA_f16-17+2f13-14.1.fid        |
| 2 Origin                   | Bruker BioSpin GmbH                         |
| 3 Owner                    | nmr                                         |
| 4 Spectrometer             | spect                                       |
| 5 Solvent                  | DMSO                                        |
| 6 Temperature              | 298.0                                       |
| 7 Pulse                    | zg                                          |
| Sequence                   |                                             |
| 8 Experiment               | 1D                                          |
| 9 Probe                    | Z129649_0009 (CP TCI 600S3 H&F-C/ N-D-05 Z) |
| 10 Number of Scans         | 16                                          |
| 11 Receiver Gain           | 140.4                                       |
| 12 Relaxation Delay        | 5.0000                                      |
| 13 Pulse Width             | 7.0100                                      |
| 14 Presaturation Frequency |                                             |
| 15 Acquisition Time        | 2.2807                                      |
| 16 Acquisition Date        | 2017-07-27T11:58:39                         |
| 17 Modification Date       | 2017-07-27T11:58:39                         |
| 18 Spectrometer Frequency  | 600.13                                      |
| 19 Spectral Width          | 7183.9                                      |
| 20 Lowest Frequency        | -594.7                                      |
| 21 Nucleus                 | <sup>1</sup> H                              |
| 22 Acquired Size           | 16384                                       |
| 23 Spectral Size           | 65536                                       |

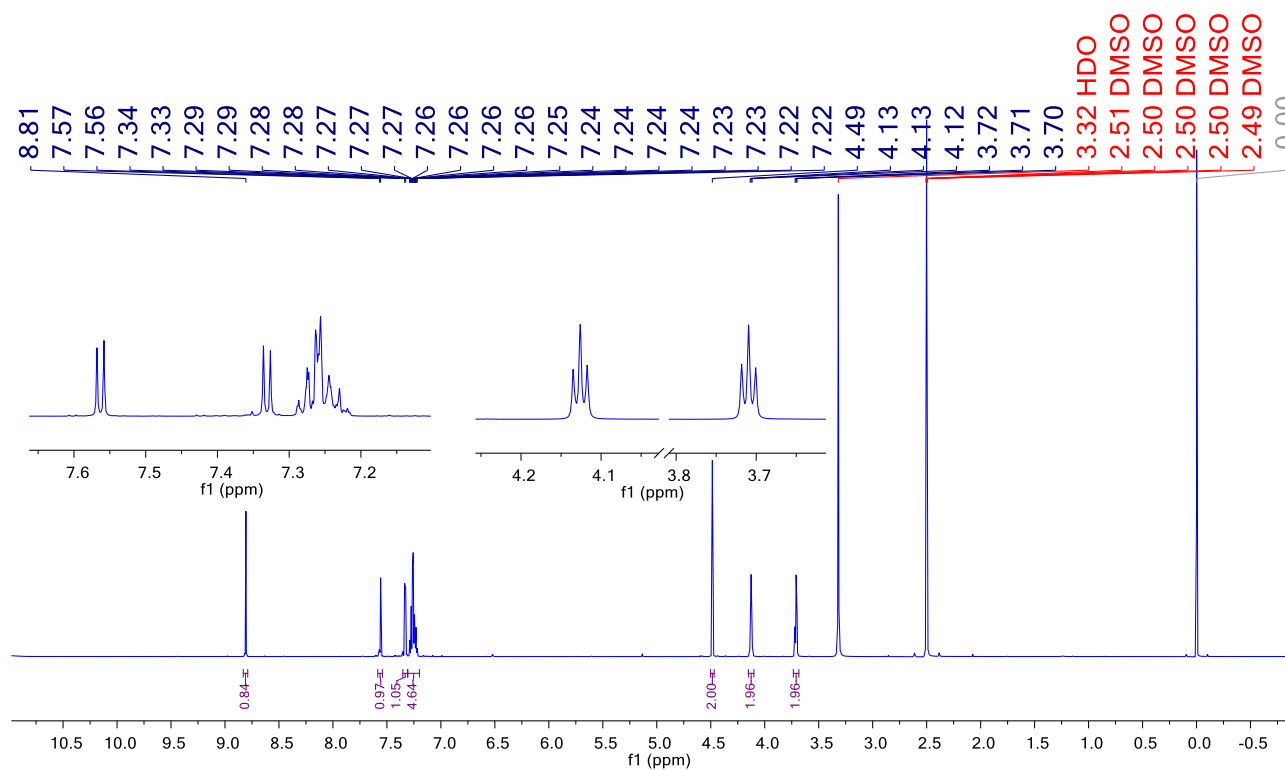

### 7-(2-(Benzyloxy)ethyl)-2-nitroimidazo[1,2-a]pyrazin-8(7H)-one (17i)



### <sup>13</sup>C NMR (150 MHz, DMSO-*d*<sub>6</sub>)

| Parameter                  | Value                                       |
|----------------------------|---------------------------------------------|
| 1 Title                    | CWA8412_112IIA_f16-17+2f13-14.3.fid         |
| 2 Origin                   | Bruker BioSpin GmbH                         |
| 3 Owner                    | nmr                                         |
| 4 Spectrometer             | spect                                       |
| 5 Solvent                  | DMSO                                        |
| 6 Temperature              | 298.0                                       |
| 7 Pulse Sequence           | zgpg                                        |
| 8 Experiment               | 1D                                          |
| 9 Probe                    | Z129649_0009 (CP TCI 600S3 H&F-C/ N-D-05 Z) |
| 10 Number of Scans         | 3000                                        |
| 11 Receiver Gain           | 191.6                                       |
| 12 Relaxation Delay        | 1.0000                                      |
| 13 Pulse Width             | 11.5000                                     |
| 14 Presaturation Frequency |                                             |
| 15 Acquisition Time        | 0.9044                                      |
| 16 Acquisition Date        | 2017-07-27T13:49:29                         |
| 17 Modification Date       | 2017-07-27T13:49:29                         |
| 18 Spectrometer Frequency  | 150.92                                      |
| 19 Spectral Width          | 36231.9                                     |
| 20 Lowest Frequency        | -3188.5                                     |
| 21 Nucleus                 | <sup>13</sup> C                             |
| 22 Acquired Size           | 32768                                       |
| 23 Spectral Size           | 65536                                       |

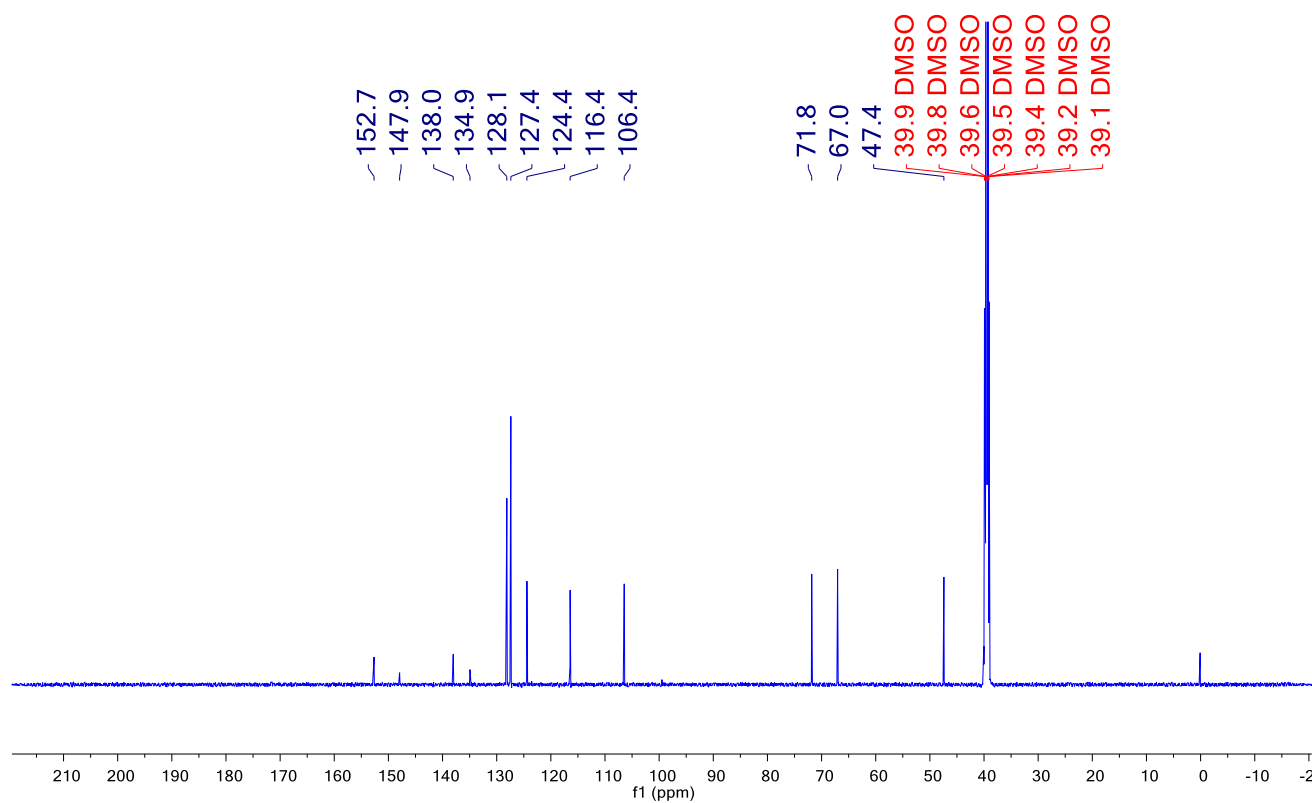

## 2-Nitro-7-(2-((4-(trifluoromethoxy)benzyl)oxy)ethyl)imidazo[1,2-a]pyrazin-8(7H)-one (17j)

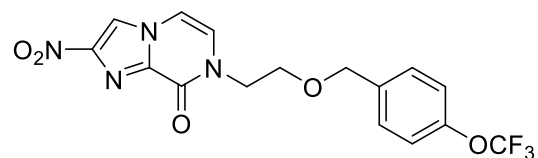

### <sup>1</sup>H NMR (600 MHz, DMSO-d<sub>6</sub>)

| Parameter                  | Value                                          |
|----------------------------|------------------------------------------------|
| 1 Title                    | CWA8692_042_f9-11_C18_co<br>mbined1.1.fid      |
| 2 Origin                   | Bruker BioSpin GmbH                            |
| 3 Owner                    | nmr                                            |
| 4 Spectrometer             | spect                                          |
| 5 Solvent                  | DMSO                                           |
| 6 Temperature              | 298.0                                          |
| 7 Pulse Sequence           | zg                                             |
| 8 Experiment               | 1D                                             |
| 9 Probe                    | Z129649_0009 (CP TCI 600S3<br>H&F-C/ N-D-05 Z) |
| 10 Number of Scans         | 32                                             |
| 11 Receiver Gain           | 140.4                                          |
| 12 Relaxation Delay        | 5.0000                                         |
| 13 Pulse Width             | 7.0100                                         |
| 14 Presaturation Frequency |                                                |
| 15 Acquisition Time        | 1.9464                                         |
| 16 Acquisition Date        | 2017-09-01T16:44:02                            |
| 17 Modification Date       | 2017-09-01T16:44:02                            |
| 18 Spectrometer Frequency  | 600.13                                         |
| 19 Spectral Width          | 8417.5                                         |
| 20 Lowest Frequency        | -1211.4                                        |
| 21 Nucleus                 | <sup>1</sup> H                                 |
| 22 Acquired Size           | 16384                                          |
| 23 Spectral Size           | 65536                                          |

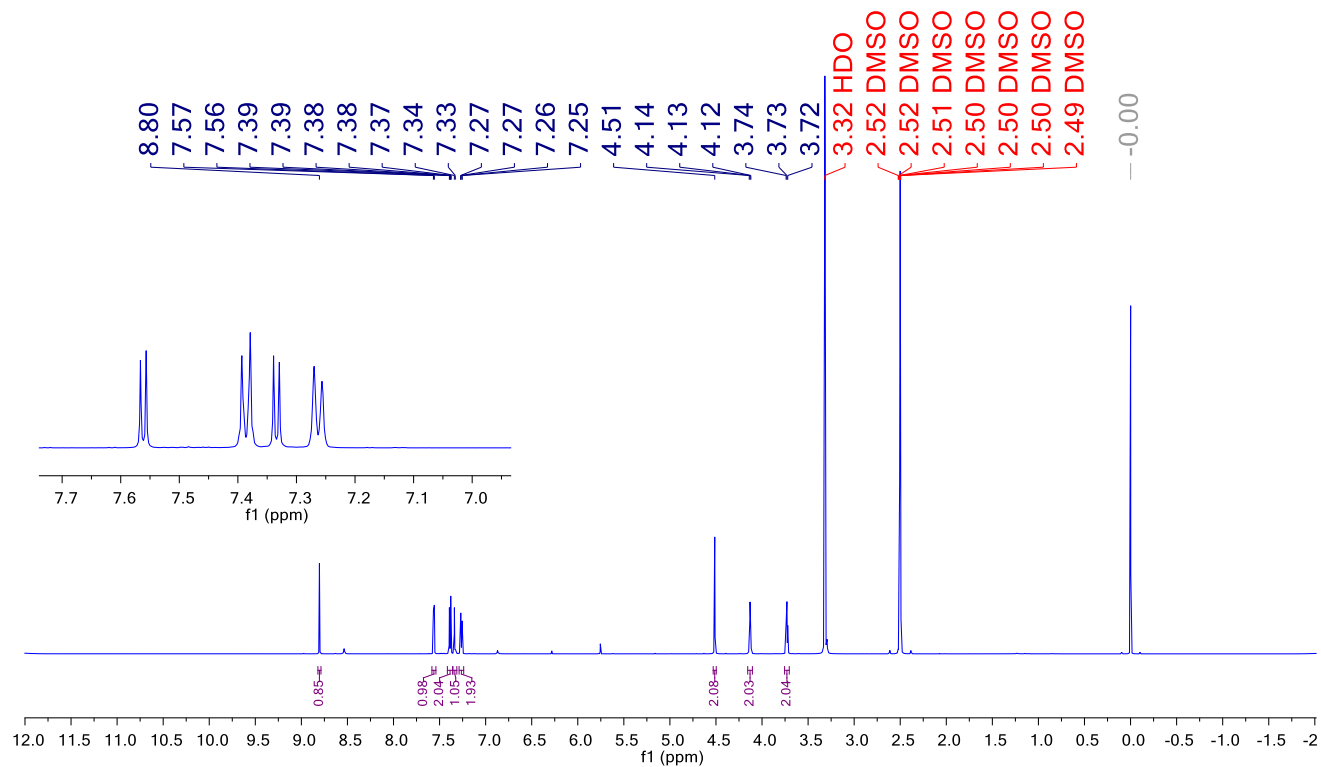



## 2-Nitro-7-(2-((4-(trifluoromethoxy)benzyl)oxy)ethyl)imidazo[1,2-*a*]pyrazin-8(7*H*)-one (17j)



### <sup>13</sup>C NMR (150 MHz, DMSO-*d*<sub>6</sub>)

| Parameter                  | Value                                       |
|----------------------------|---------------------------------------------|
| 1 Title                    | CWA8692_042_f9-11_C18_combined1.4.fid       |
| 2 Origin                   | Bruker BioSpin GmbH                         |
| 3 Owner                    | nmr                                         |
| 4 Spectrometer             | spect                                       |
| 5 Solvent                  | DMSO                                        |
| 6 Temperature              | 298.0                                       |
| 7 Pulse Sequence           | jmod                                        |
| 8 Experiment               | JMOD                                        |
| 9 Probe                    | Z129649_0009 (CP TCI 600S3 H&F-C/ N-D-05 Z) |
| 10 Number of Scans         | 10000                                       |
| 11 Receiver Gain           | 191.6                                       |
| 12 Relaxation Delay        | 1.0000                                      |
| 13 Pulse Width             | 11.5000                                     |
| 14 Presaturation Frequency |                                             |
| 15 Acquisition Time        | 0.8738                                      |
| 16 Acquisition Date        | 2017-09-01T22:33:15                         |
| 17 Modification Date       | 2017-09-01T22:33:15                         |
| 18 Spectrometer Frequency  | 150.92                                      |
| 19 Spectral Width          | 37500.0                                     |
| 20 Lowest Frequency        | -2313.9                                     |
| 21 Nucleus                 | <sup>13</sup> C                             |
| 22 Acquired Size           | 32768                                       |
| 23 Spectral Size           | 65536                                       |

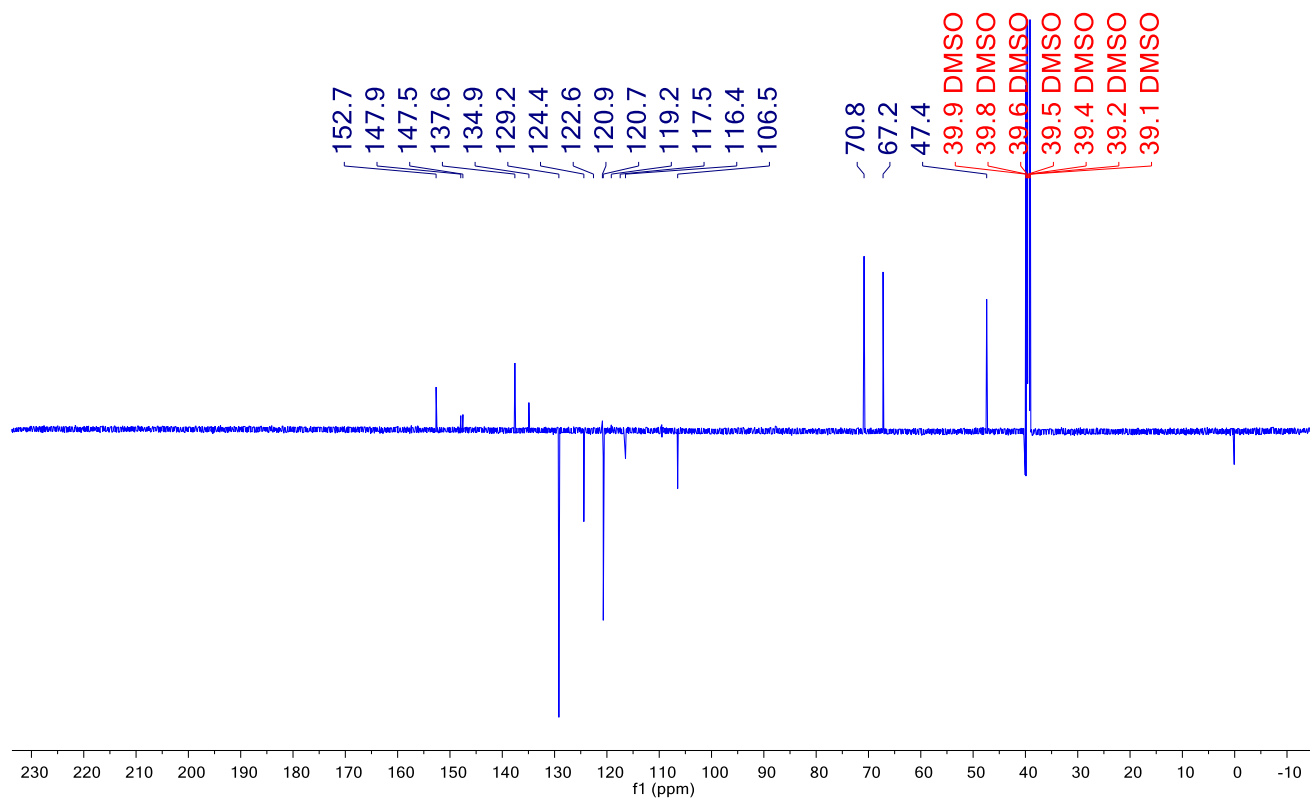

7-(2-((4-Methylbenzyl)oxy)ethyl)-2-nitroimidazo[1,2-a]pyrazin-8(7H)-one (17k)

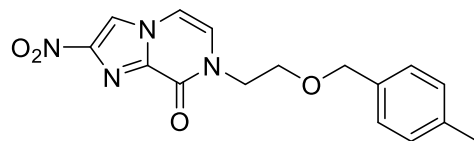

<sup>1</sup>H NMR (600 MHz, DMSO-d<sub>6</sub>)

| Parameter                  | Value                                       |
|----------------------------|---------------------------------------------|
| 1 Title                    | CWA8692_045_ppt.2.fid                       |
| 2 Origin                   | Bruker BioSpin GmbH                         |
| 3 Owner                    | nmr                                         |
| 4 Spectrometer             | spect                                       |
| 5 Solvent                  | DMSO                                        |
| 6 Temperature              | 298.0                                       |
| 7 Pulse Sequence           | zg                                          |
| 8 Experiment               | 1D                                          |
| 9 Probe                    | Z129649_0009 (CP TCI 600S3 H&F-C/ N-D-05 Z) |
| 10 Number of Scans         | 16                                          |
| 11 Receiver Gain           | 59.7                                        |
| 12 Relaxation Delay        | 5.0000                                      |
| 13 Pulse Width             | 7.0100                                      |
| 14 Presaturation Frequency |                                             |
| 15 Acquisition Time        | 1.9464                                      |
| 16 Acquisition Date        | 2017-09-04T16:42:44                         |
| 17 Modification Date       | 2017-09-04T16:42:44                         |
| 18 Spectrometer Frequency  | 600.13                                      |
| 19 Spectral Width          | 8417.5                                      |
| 20 Lowest Frequency        | -1212.4                                     |
| 21 Nucleus                 | <sup>1</sup> H                              |
| 22 Acquired Size           | 16384                                       |
| 23 Spectral Size           | 65536                                       |

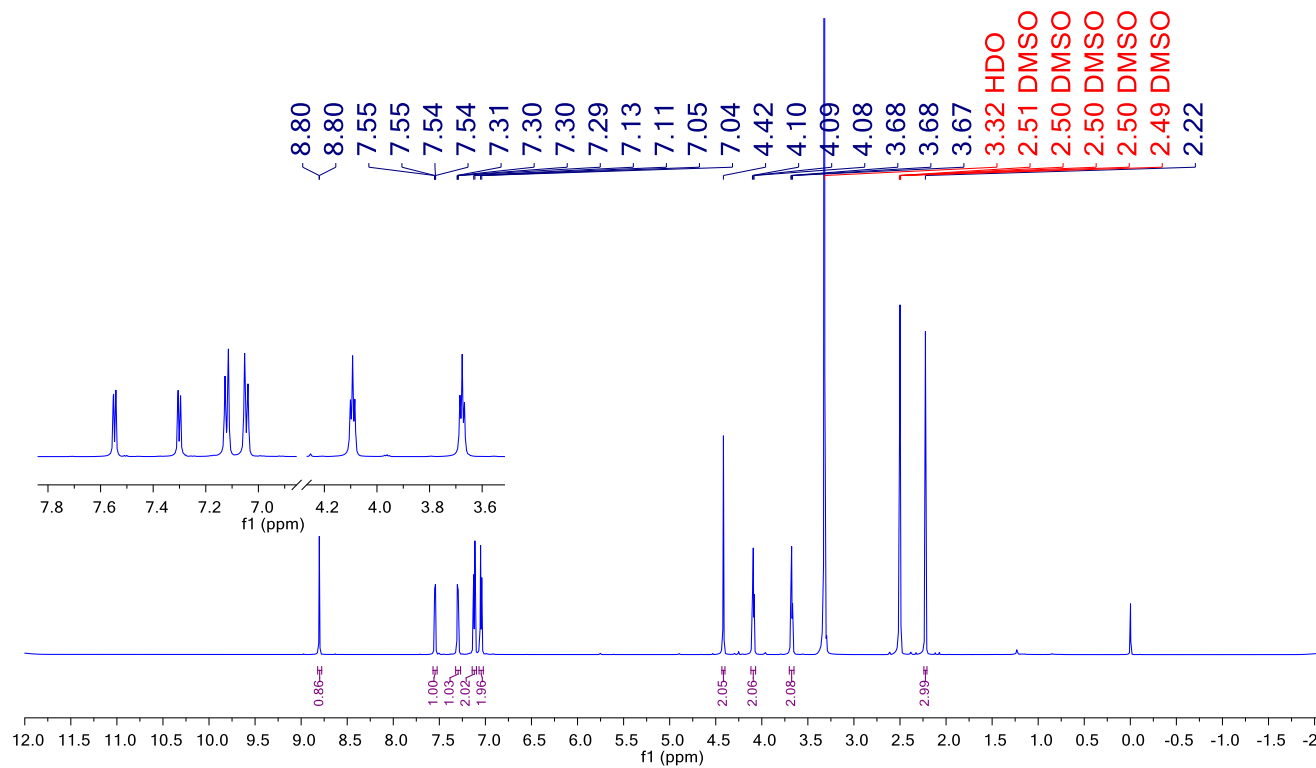

### 7-((4-Methylbenzyl)oxy)ethyl)-2-nitroimidazo[1,2-a]pyrazin-8(7H)-one (17k)



### <sup>13</sup>C NMR (150 MHz, DMSO-d<sub>6</sub>)

| Parameter                  | Value                                       |
|----------------------------|---------------------------------------------|
| 1 Title                    | CWA8692_045_ppt.3.fid                       |
| 2 Origin                   | Bruker BioSpin GmbH                         |
| 3 Owner                    | nmr                                         |
| 4 Spectrometer             | spect                                       |
| 5 Solvent                  | DMSO                                        |
| 6 Temperature              | 298.0                                       |
| 7 Pulse Sequence           | jmod                                        |
| 8 Experiment               | JMOD                                        |
| 9 Probe                    | Z129649_0009 (CP TCI 600S3 H&F-C/ N-D-05 Z) |
| 10 Number of Scans         | 10000                                       |
| 11 Receiver Gain           | 191.6                                       |
| 12 Relaxation Delay        | 1.0000                                      |
| 13 Pulse Width             | 11.5000                                     |
| 14 Presaturation Frequency |                                             |
| 15 Acquisition Time        | 0.8738                                      |
| 16 Acquisition Date        | 2017-09-04T22:11:13                         |
| 17 Modification Date       | 2017-09-04T22:11:13                         |
| 18 Spectrometer Frequency  | 150.92                                      |
| 19 Spectral Width          | 37500.0                                     |
| 20 Lowest Frequency        | -2151.2                                     |
| 21 Nucleus                 | <sup>13</sup> C                             |
| 22 Acquired Size           | 32768                                       |
| 23 Spectral Size           | 65536                                       |

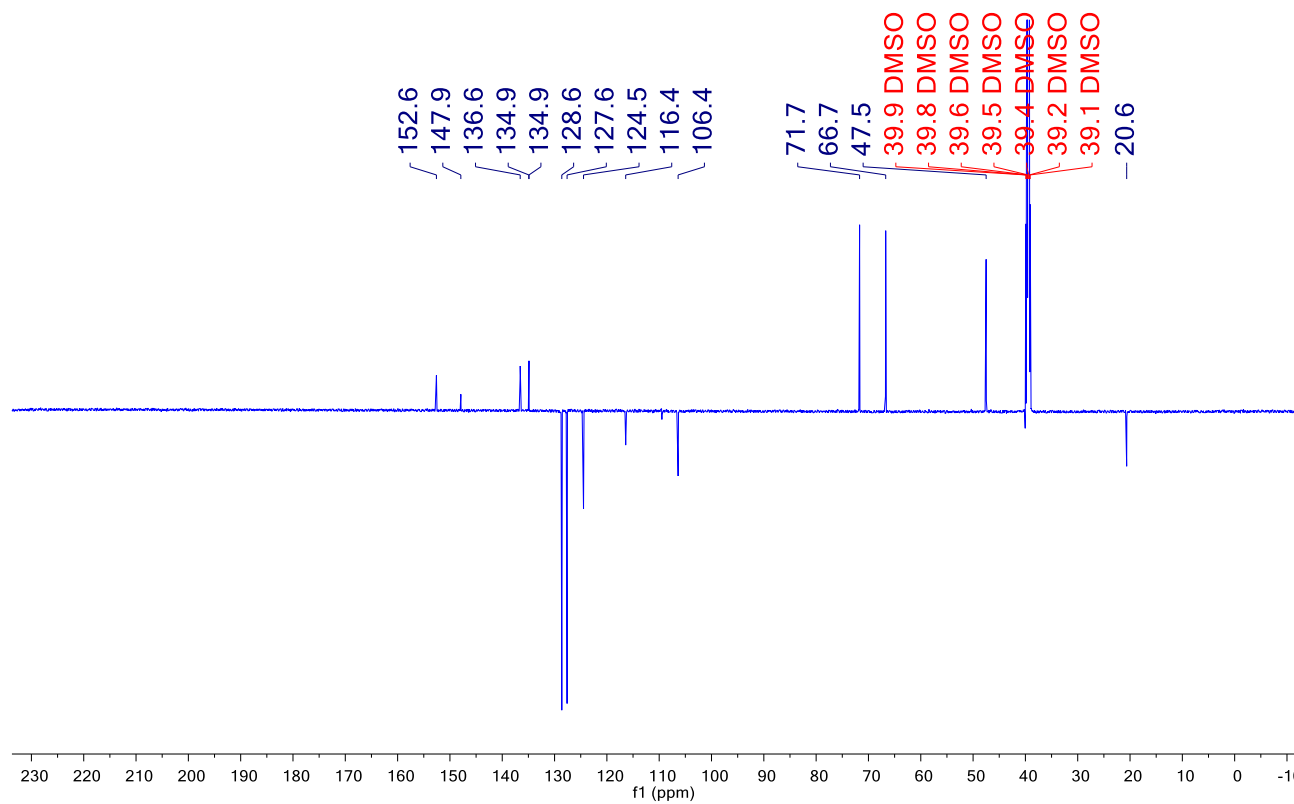

## 2-Nitro-7-(thiazol-5-ylmethyl)imidazo[1,2-a]pyrazin-8(7H)-one (26a)

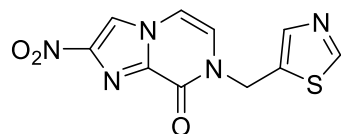

### <sup>1</sup>H NMR (600 MHz, DMSO-d<sub>6</sub>)

| Parameter                  | Value                                          |
|----------------------------|------------------------------------------------|
| 1 Title                    | CWA8967_023_ppt_DCM_MeOH.6.fid                 |
| 2 Origin                   | Bruker BioSpin GmbH                            |
| 3 Owner                    | nmr                                            |
| 4 Spectrometer             | spect                                          |
| 5 Solvent                  | DMSO                                           |
| 6 Temperature              | 298.0                                          |
| 7 Pulse Sequence           | zg                                             |
| 8 Experiment               | 1D                                             |
| 9 Probe                    | Z129649_0009 (CP TCI 600S3 H&F-C/<br>N-D-05 Z) |
| 10 Number of Scans         | 16                                             |
| 11 Receiver Gain           | 59.7                                           |
| 12 Relaxation Delay        | 10.0000                                        |
| 13 Pulse Width             | 7.0100                                         |
| 14 Presaturation Frequency |                                                |
| 15 Acquisition Time        | 1.9464                                         |
| 16 Acquisition Date        | 2018-04-12T16:23:02                            |
| 17 Modification Date       | 2018-04-12T16:23:02                            |
| 18 Spectrometer Frequency  | 600.13                                         |
| 19 Spectral Width          | 8417.5                                         |
| 20 Lowest Frequency        | -1208.1                                        |
| 21 Nucleus                 | <sup>1</sup> H                                 |
| 22 Acquired Size           | 16384                                          |
| 23 Spectral Size           | 65536                                          |

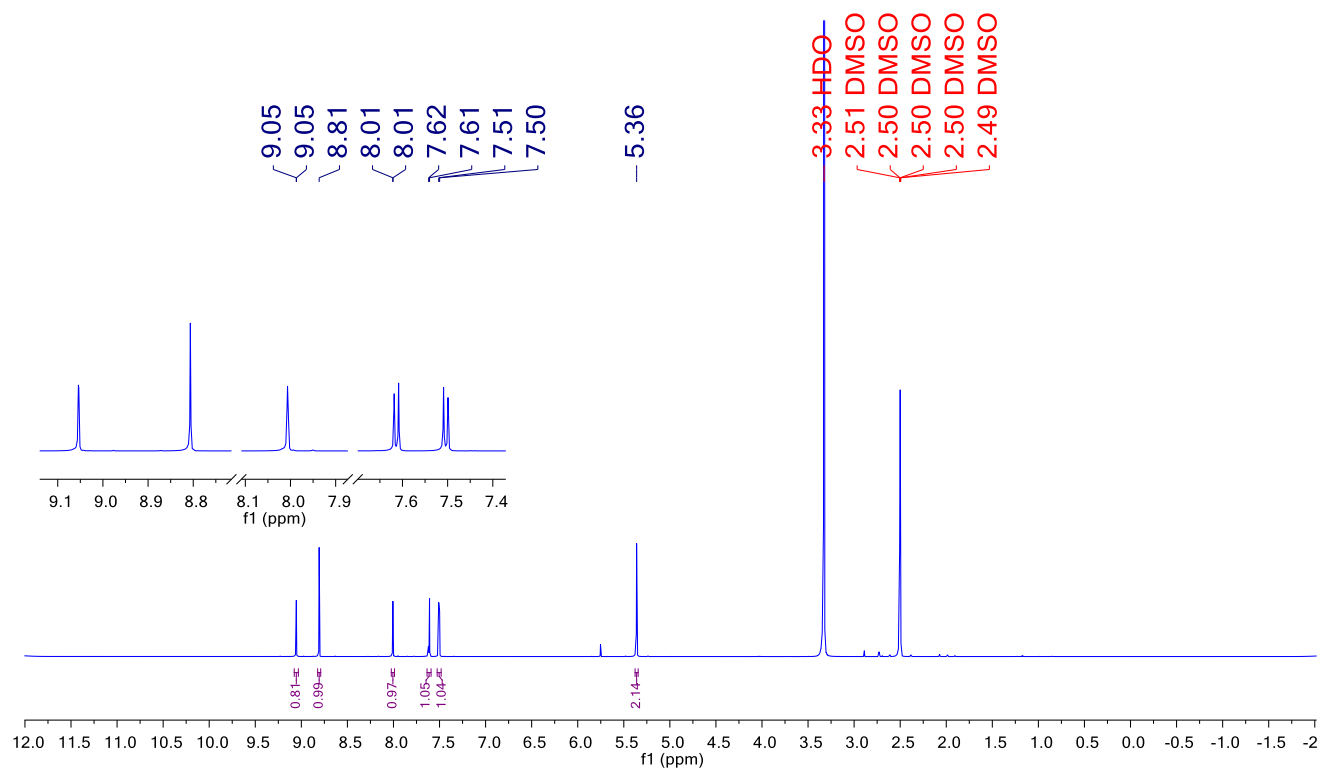

## 2-Nitro-7-(thiazol-5-ylmethyl)imidazo[1,2-a]pyrazin-8(7H)-one (26a)

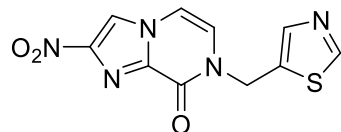

### $^{13}\text{C}$ NMR (150 MHz, DMSO- $d_6$ )

| Parameter                  | Value                                          |
|----------------------------|------------------------------------------------|
| 1 Title                    | CWA8967_023_ppt_DCM_MeOH.2.fid                 |
| 2 Origin                   | Bruker BioSpin GmbH                            |
| 3 Owner                    | nmr                                            |
| 4 Spectrometer             | spect                                          |
| 5 Solvent                  | DMSO                                           |
| 6 Temperature              | 298.0                                          |
| 7 Pulse Sequence           | jmod                                           |
| 8 Experiment               | JMOD                                           |
| 9 Probe                    | Z129649_0009 (CP TCI 600S3 H&F-C/<br>N-D-05 Z) |
| 10 Number of Scans         | 9500                                           |
| 11 Receiver Gain           | 191.6                                          |
| 12 Relaxation Delay        | 1.0000                                         |
| 13 Pulse Width             | 11.5000                                        |
| 14 Presaturation Frequency |                                                |
| 15 Acquisition Time        | 0.8738                                         |
| 16 Acquisition Date        | 2018-04-10T23:00:22                            |
| 17 Modification Date       | 2018-04-10T23:00:22                            |
| 18 Spectrometer Frequency  | 150.92                                         |
| 19 Spectral Width          | 37500.0                                        |
| 20 Lowest Frequency        | -2151.2                                        |
| 21 Nucleus                 | $^{13}\text{C}$                                |
| 22 Acquired Size           | 32768                                          |
| 23 Spectral Size           | 65536                                          |

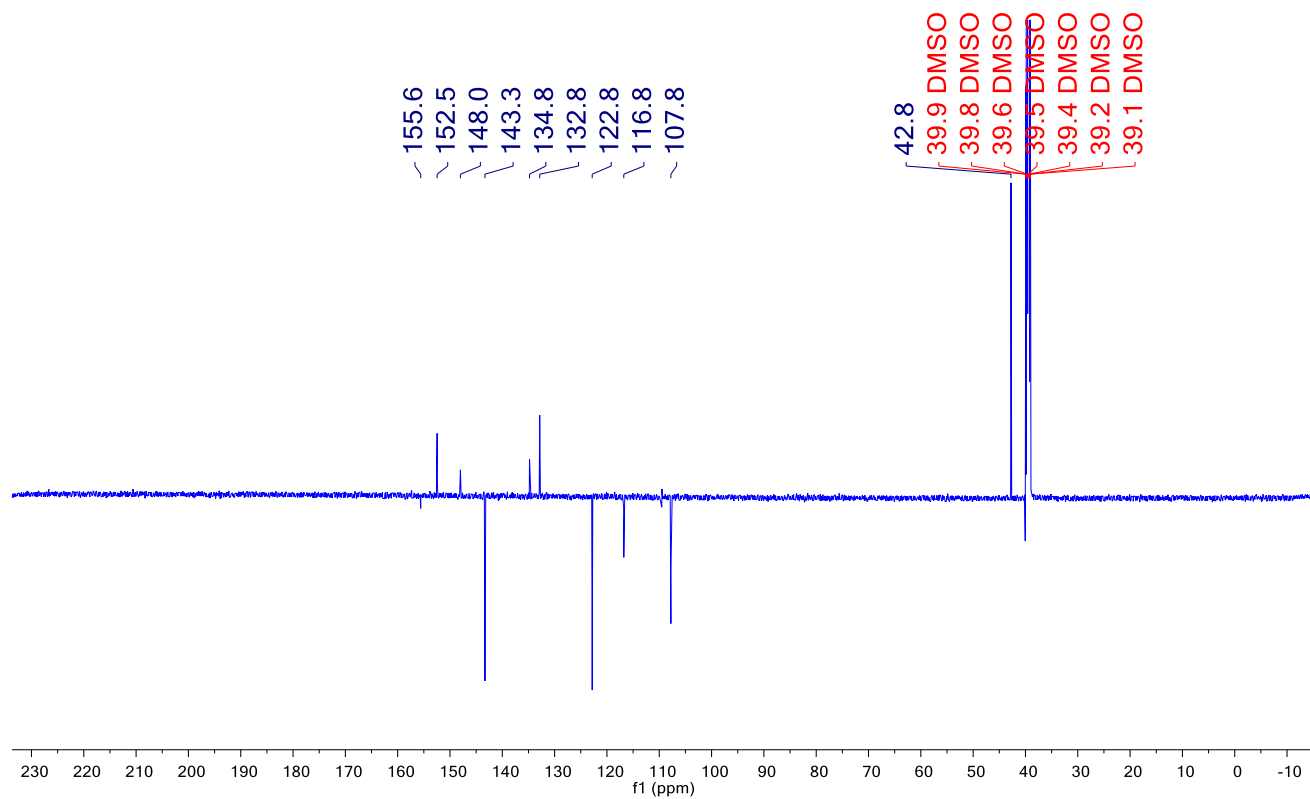

## 2-Nitro-7-(thiazol-2-ylmethyl)imidazo[1,2-a]pyrazin-8(7H)-one (26b)

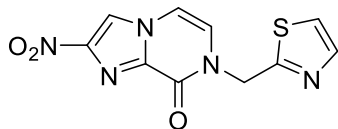

### <sup>1</sup>H NMR (600 MHz, DMSO-d<sub>6</sub>)

| Parameter                  | Value                                                                                                                         |
|----------------------------|-------------------------------------------------------------------------------------------------------------------------------|
| 1 Data File Name           | Z:/ Projects/ 029_Anaerobic/ 029E_Chemistry/ LaboratoryNoteBooks/ CWA8805/ CWA8805_066/ NMR/ CWA8805_066_ppt_DCM_MeOH/ 1/ fid |
| 2 Title                    | CWA8805_066_ppt_DCM_MeOH.1.fid                                                                                                |
| 3 Comment                  | <sup>1</sup> H NMR of CWA8805_066_ppt_DCM_MeOH 1.7mg in 500uL DMSO-d <sub>6</sub> ; cryoprobe                                 |
| 4 Origin                   | Bruker BioSpin GmbH                                                                                                           |
| 5 Owner                    | nmr                                                                                                                           |
| 6 Site                     |                                                                                                                               |
| 7 Instrument               | spect                                                                                                                         |
| 8 Author                   |                                                                                                                               |
| 9 Solvent                  | DMSO                                                                                                                          |
| 10 Temperature             | 298.0                                                                                                                         |
| 11 Pulse Sequence          | zg                                                                                                                            |
| 12 Experiment              | 1D                                                                                                                            |
| 13 Probe                   | Z129649_0009 (CP TCI 600S3 H&F-C/ N-D-05 Z)                                                                                   |
| 14 Number of Scans         | 16                                                                                                                            |
| 15 Receiver Gain           | 116.1                                                                                                                         |
| 16 Relaxation Delay        | 5.0000                                                                                                                        |
| 17 Pulse Width             | 7.0100                                                                                                                        |
| 18 Presaturation Frequency |                                                                                                                               |
| 19 Acquisition Time        | 1.9464                                                                                                                        |
| 20 Acquisition Date        | 2018-01-25T16:46:34                                                                                                           |
| 21 Modification Date       | 2018-01-25T16:46:34                                                                                                           |
| 22 Class                   |                                                                                                                               |
| 23 Spectrometer Frequency  | 600.13                                                                                                                        |
| 24 Spectral Width          | 8417.5                                                                                                                        |
| 25 Lowest Frequency        | -1208.1                                                                                                                       |
| 26 Nucleus                 | <sup>1</sup> H                                                                                                                |
| 27 Acquired Size           | 16384                                                                                                                         |
| 28 Spectral Size           | 65536                                                                                                                         |

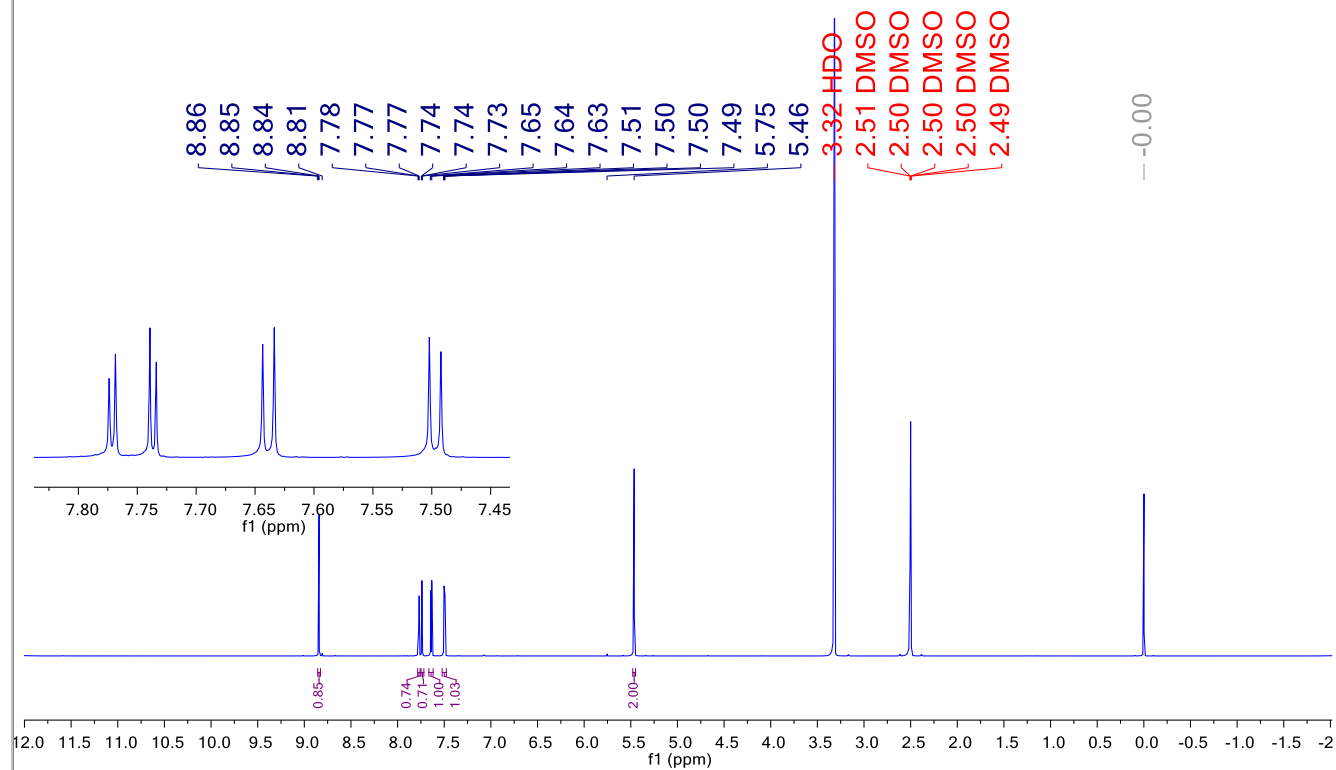

## 2-Nitro-7-(thiazol-2-ylmethyl)imidazo[1,2-a]pyrazin-8(7H)-one (26b)

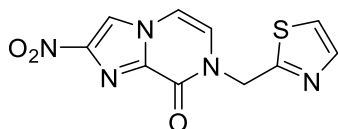

### <sup>13</sup>C NMR (150 MHz, DMSO-*d*<sub>6</sub>)

| Parameter                  | Value                                                                                                                         |
|----------------------------|-------------------------------------------------------------------------------------------------------------------------------|
| 1 Data File Name           | Z:/ Projects/ 029_Anaerobic/ 029E_Chemistry/ LaboratoryNoteBooks/ CWA8805/ CWA8805_066/ NMR/ CWA8805_066_ppt_DCM_MeOH/ 2/ fid |
| 2 Title                    | CWA8805_066_ppt_DCM_MeOH.2.fid                                                                                                |
| 3 Comment                  | <sup>13</sup> C JMOD NMR of CWA8805_066_ppt_DCM_MeOH 1.7mg in 500uL DMSO- <i>d</i> <sub>6</sub> ; cryoprobe                   |
| 4 Origin                   | Bruker BioSpin GmbH                                                                                                           |
| 5 Owner                    | nmr                                                                                                                           |
| 6 Site                     |                                                                                                                               |
| 7 Instrument               | spect                                                                                                                         |
| 8 Author                   |                                                                                                                               |
| 9 Solvent                  | DMSO                                                                                                                          |
| 10 Temperature             | 298.0                                                                                                                         |
| 11 Pulse Sequence          | jmod                                                                                                                          |
| 12 Experiment              | JMOD                                                                                                                          |
| 13 Probe                   | Z129649_0009 (CP TCI 600S3 H&F-C/ N-D-05 Z)                                                                                   |
| 14 Number of Scans         | 9000                                                                                                                          |
| 15 Receiver Gain           | 191.6                                                                                                                         |
| 16 Relaxation Delay        | 1.0000                                                                                                                        |
| 17 Pulse Width             | 11.5000                                                                                                                       |
| 18 Presaturation Frequency |                                                                                                                               |
| 19 Acquisition Time        | 0.8738                                                                                                                        |
| 20 Acquisition Date        | 2018-01-27T13:55:32                                                                                                           |
| 21 Modification Date       | 2018-01-27T13:55:32                                                                                                           |
| 22 Class                   |                                                                                                                               |
| 23 Spectrometer Frequency  | 150.92                                                                                                                        |
| 24 Spectral Width          | 37500.0                                                                                                                       |
| 25 Lowest Frequency        | -2151.2                                                                                                                       |
| 26 Nucleus                 | <sup>13</sup> C                                                                                                               |
| 27 Acquired Size           | 32768                                                                                                                         |
| 28 Spectral Size           | 65536                                                                                                                         |

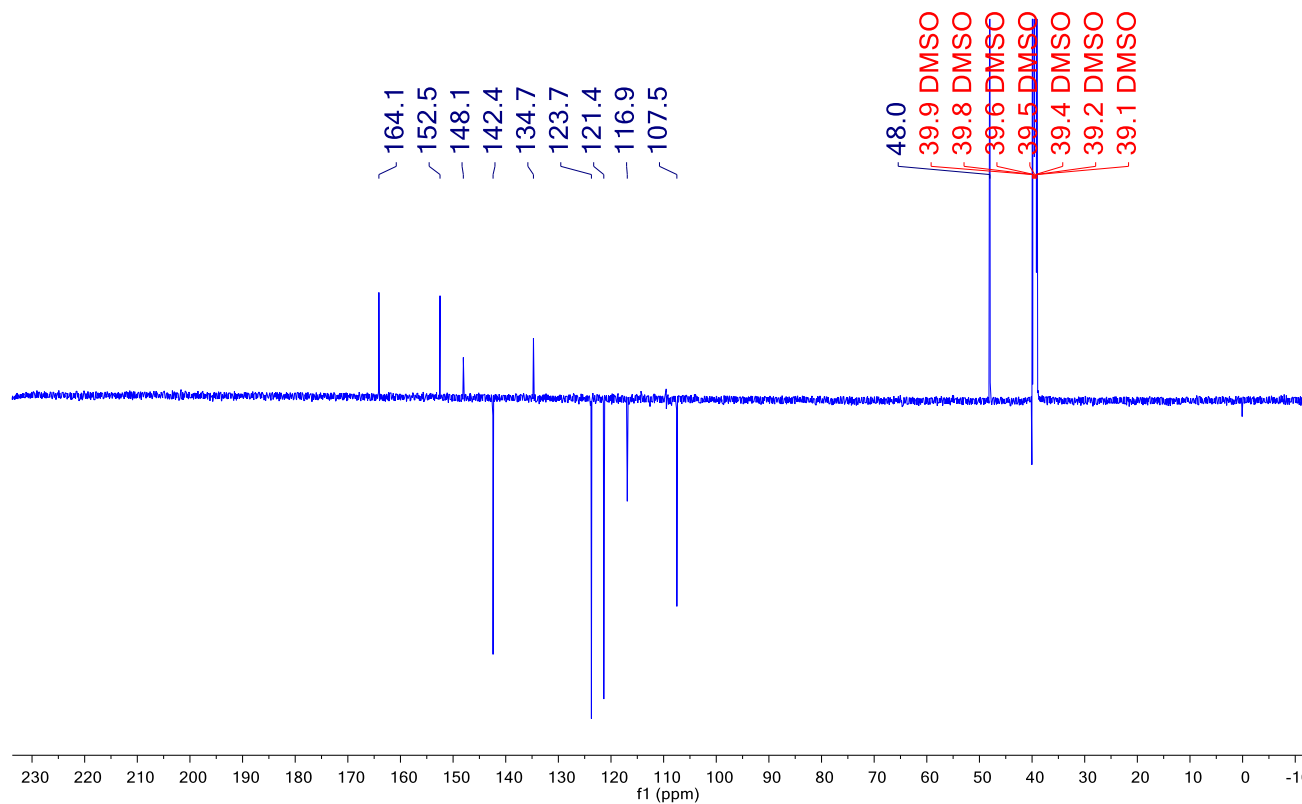

**7-((1-Methyl-1*H*-imidazol-2-yl)methyl)-2-nitroimidazo[1,2-*a*]pyrazin-8(7*H*)-one (26c)**

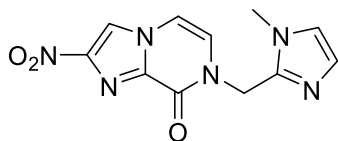

**<sup>1</sup>H NMR (600 MHz, DMSO-*d*<sub>6</sub>)**

| Parameter                  | Value                                          |
|----------------------------|------------------------------------------------|
| 1 Title                    | CWA8967_059_ppt_DCM_MeOH.1.fid                 |
| 2 Origin                   | Bruker BioSpin GmbH                            |
| 3 Owner                    | nmr                                            |
| 4 Spectrometer             | spect                                          |
| 5 Solvent                  | DMSO                                           |
| 6 Temperature              | 298.0                                          |
| 7 Pulse Sequence           | zg                                             |
| 8 Experiment               | 1D                                             |
| 9 Probe                    | Z129649_0009 (CP TCI 600S3 H&F-C/<br>N-D-05 Z) |
| 10 Number of Scans         | 16                                             |
| 11 Receiver Gain           | 59.7                                           |
| 12 Relaxation Delay        | 5.0000                                         |
| 13 Pulse Width             | 8.0000                                         |
| 14 Presaturation Frequency |                                                |
| 15 Acquisition Time        | 1.9464                                         |
| 16 Acquisition Date        | 2018-07-04T13:44:59                            |
| 17 Modification Date       | 2018-07-04T13:44:59                            |
| 18 Spectrometer Frequency  | 600.13                                         |
| 19 Spectral Width          | 8417.5                                         |
| 20 Lowest Frequency        | -1208.1                                        |
| 21 Nucleus                 | <sup>1</sup> H                                 |
| 22 Acquired Size           | 16384                                          |
| 23 Spectral Size           | 65536                                          |

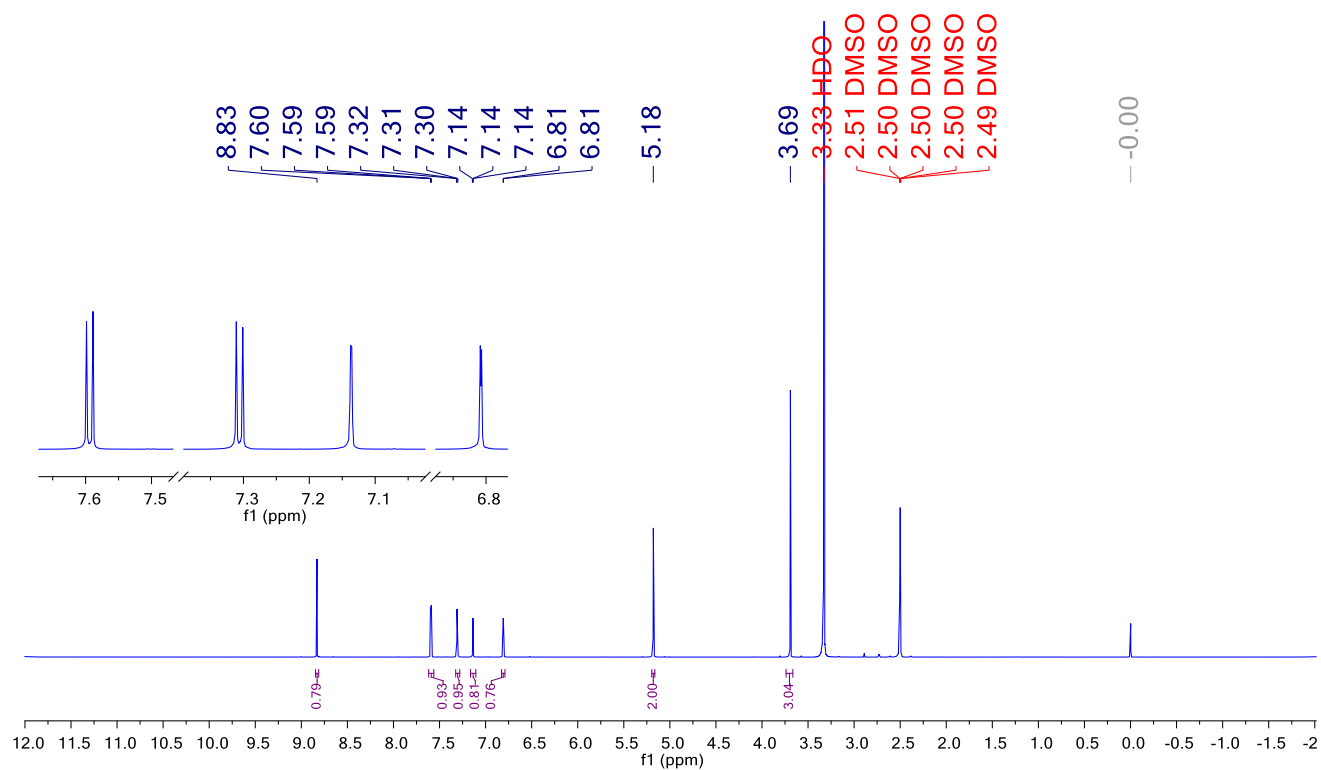



### 7-((1-Methyl-1*H*-imidazol-2-yl)methyl)-2-nitroimidazo[1,2-*a*]pyrazin-8(7*H*)-one (26c)

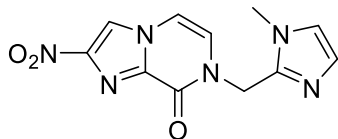

### <sup>13</sup>C NMR (150 MHz, DMSO-*d*<sub>6</sub>)

| Parameter                  | Value                                          |
|----------------------------|------------------------------------------------|
| 1 Title                    | CWA8967_059_ppT_DCM_MeOH.2.fid                 |
| 2 Origin                   | Bruker BioSpin GmbH                            |
| 3 Owner                    | nmr                                            |
| 4 Spectrometer             | spect                                          |
| 5 Solvent                  | DMSO                                           |
| 6 Temperature              | 298.0                                          |
| 7 Pulse Sequence           | jmod                                           |
| 8 Experiment               | JMOD                                           |
| 9 Probe                    | Z129649_0009 (CP TCI 600S3 H&F-C/<br>N-D-05 Z) |
| 10 Number of Scans         | 4096                                           |
| 11 Receiver Gain           | 191.6                                          |
| 12 Relaxation Delay        | 1.0000                                         |
| 13 Pulse Width             | 12.0000                                        |
| 14 Presaturation Frequency |                                                |
| 15 Acquisition Time        | 0.8738                                         |
| 16 Acquisition Date        | 2018-07-04T16:01:59                            |
| 17 Modification Date       | 2018-07-04T16:01:59                            |
| 18 Spectrometer Frequency  | 150.92                                         |
| 19 Spectral Width          | 37500.0                                        |
| 20 Lowest Frequency        | -2151.2                                        |
| 21 Nucleus                 | <sup>13</sup> C                                |
| 22 Acquired Size           | 32768                                          |
| 23 Spectral Size           | 65536                                          |

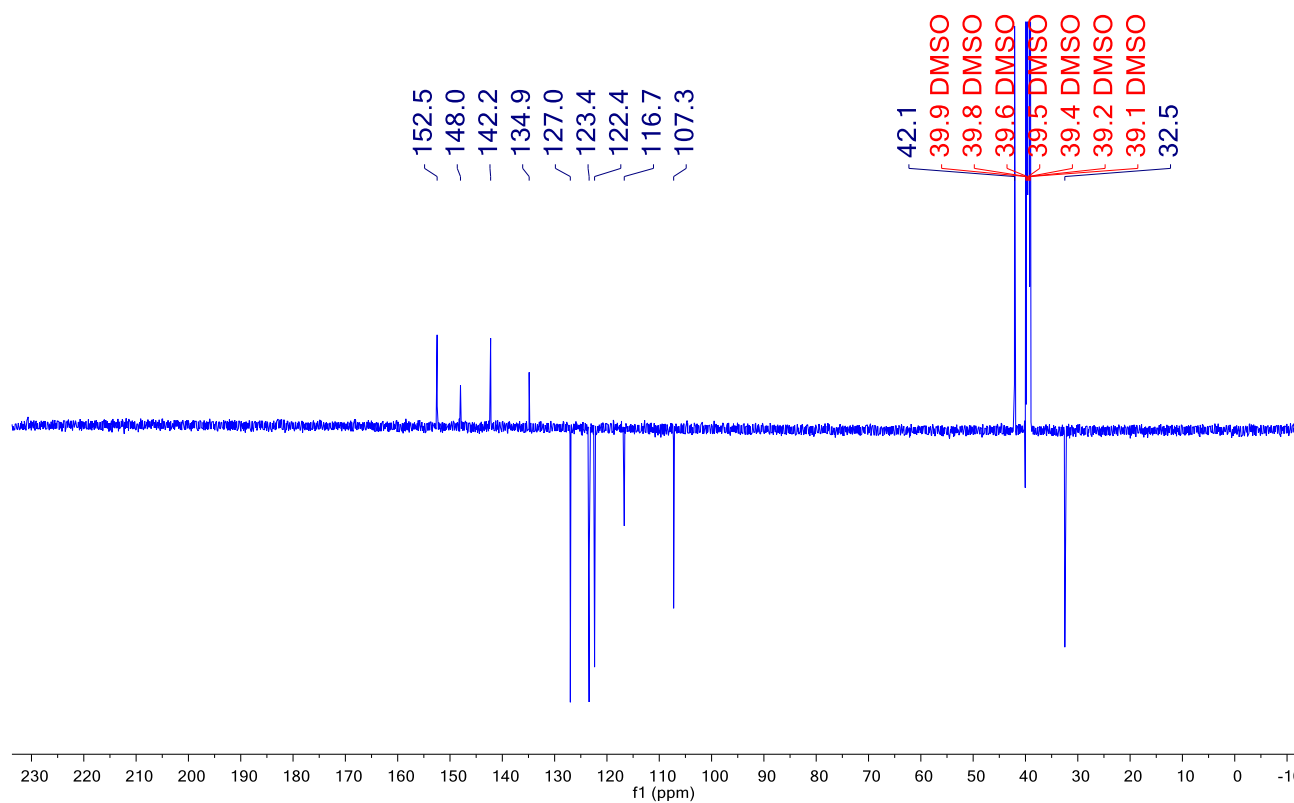

**7-((1-Methyl-1H-pyrazol-5-yl)methyl)-2-nitroimidazo[1,2-a]pyrazin-8(7H)-one (26d)**

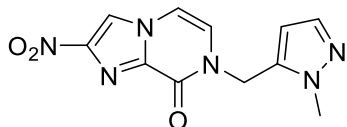

**<sup>1</sup>H NMR (600 MHz, DMSO-d<sub>6</sub>)**

| Parameter                  | Value                                                                                                                         |
|----------------------------|-------------------------------------------------------------------------------------------------------------------------------|
| 1 Data File Name           | Z:/ Projects/ 029_Anaerobic/ 029E_Chemistry/ LaboratoryNoteBooks/ CWA8967/ CWA8967_005/ NMR/ CWA8967_005_ppt_DCM_MeOH/ 1/ fid |
| 2 Title                    | CWA8967_005_ppt_DCM_MeOH.1.fid                                                                                                |
| 3 Comment                  | <sup>1</sup> H NMR of CWA8967_005_ppt_DCM_MeOH 1.5mg in 500uL DMSO-d <sub>6</sub> ; cryoprobe                                 |
| 4 Origin                   | Bruker BioSpin GmbH                                                                                                           |
| 5 Owner                    | nmr                                                                                                                           |
| 6 Site                     |                                                                                                                               |
| 7 Instrument               | spect                                                                                                                         |
| 8 Author                   |                                                                                                                               |
| 9 Solvent                  | DMSO                                                                                                                          |
| 10 Temperature             | 298.0                                                                                                                         |
| 11 Pulse Sequence          | zg                                                                                                                            |
| 12 Experiment              | 1D                                                                                                                            |
| 13 Probe                   | Z129649_0009 (CP TCI 600S3 H&F-C/ N-D-05 Z)                                                                                   |
| 14 Number of Scans         | 32                                                                                                                            |
| 15 Receiver Gain           | 96.4                                                                                                                          |
| 16 Relaxation Delay        | 5.0000                                                                                                                        |
| 17 Pulse Width             | 7.0100                                                                                                                        |
| 18 Presaturation Frequency |                                                                                                                               |
| 19 Acquisition Time        | 1.9464                                                                                                                        |
| 20 Acquisition Date        | 2018-03-16T17:02:24                                                                                                           |
| 21 Modification Date       | 2018-03-16T17:02:24                                                                                                           |
| 22 Class                   |                                                                                                                               |
| 23 Spectrometer Frequency  | 600.13                                                                                                                        |
| 24 Spectral Width          | 8417.5                                                                                                                        |
| 25 Lowest                  | -1208.1                                                                                                                       |

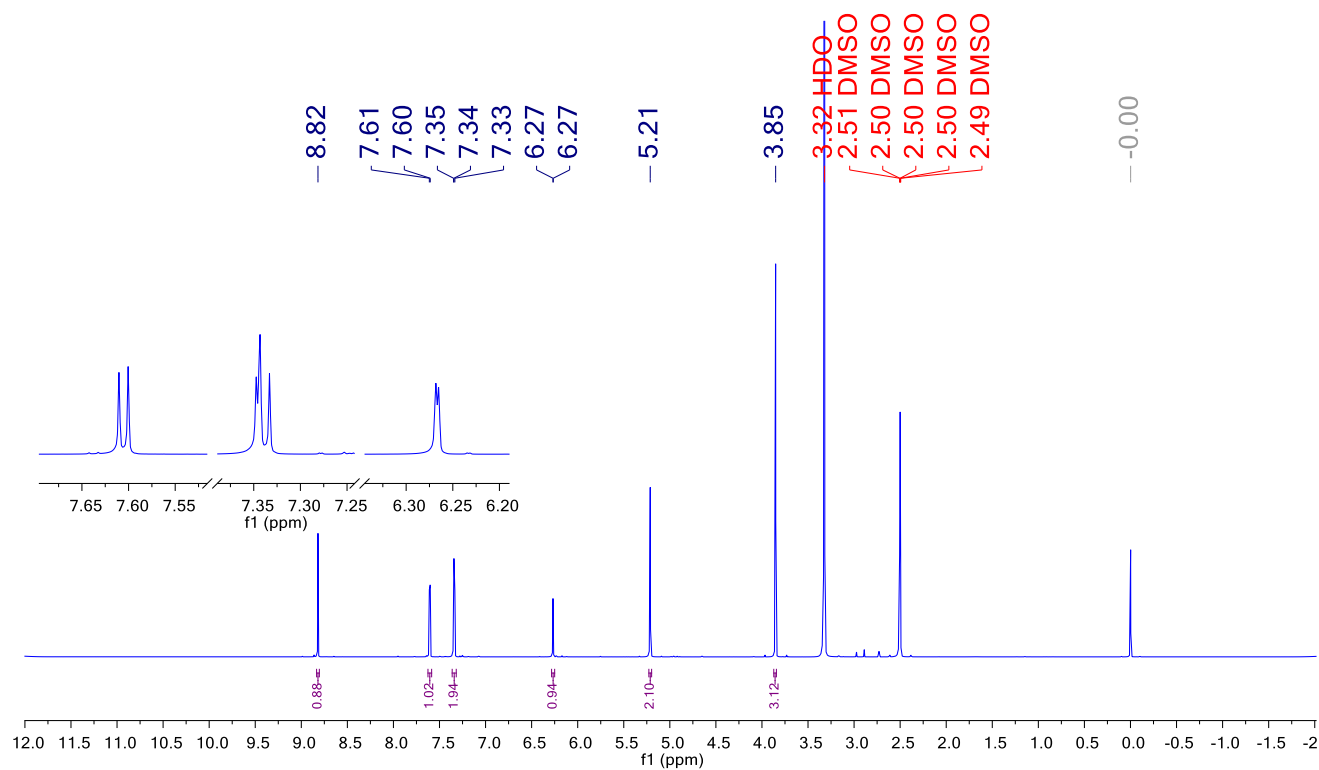

**7-((1-Methyl-1H-pyrazol-5-yl)methyl)-2-nitroimidazo[1,2-a]pyrazin-8(7H)-one (26d)**

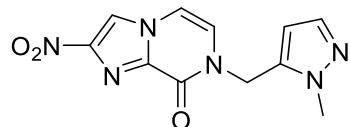

**<sup>13</sup>C NMR (150 MHz, DMSO-*d*<sub>6</sub>)**

| Parameter                  | Value                                                                                                                         |
|----------------------------|-------------------------------------------------------------------------------------------------------------------------------|
| 1 Data File Name           | Z:/ Projects/ 029_Anaerobic/ 029E_Chemistry/ LaboratoryNoteBooks/ CWA8967/ CWA8967_005/ NMR/ CWA8967_005_ppt_DCM_MeOH/ 2/ fid |
| 2 Title                    | CWA8967_005_ppt_DCM_MeOH.2.fid                                                                                                |
| 3 Comment                  | <sup>13</sup> C JMOD NMR of CWA8967_005_ppt_DCM_MeOH 1.5mg in 500uL DMSO- <i>d</i> <sub>6</sub> ; cryoprobe                   |
| 4 Origin                   | Bruker BioSpin GmbH                                                                                                           |
| 5 Owner                    | nmr                                                                                                                           |
| 6 Site                     |                                                                                                                               |
| 7 Instrument               | spect                                                                                                                         |
| 8 Author                   |                                                                                                                               |
| 9 Solvent                  | DMSO                                                                                                                          |
| 10 Temperature             | 298.0                                                                                                                         |
| 11 Pulse Sequence          | jmod                                                                                                                          |
| 12 Experiment              | JMOD                                                                                                                          |
| 13 Probe                   | Z129649_0009 (CP TCI 600S3 H&F-C/ N-D-05 Z)                                                                                   |
| 14 Number of Scans         | 9500                                                                                                                          |
| 15 Receiver Gain           | 191.6                                                                                                                         |
| 16 Relaxation Delay        | 1.0000                                                                                                                        |
| 17 Pulse Width             | 11.5000                                                                                                                       |
| 18 Presaturation Frequency |                                                                                                                               |
| 19 Acquisition Time        | 0.8738                                                                                                                        |
| 20 Acquisition Date        | 2018-03-16T22:13:59                                                                                                           |
| 21 Modification Date       | 2018-03-16T22:13:59                                                                                                           |
| 22 Class                   |                                                                                                                               |
| 23 Spectrometer Frequency  | 150.92                                                                                                                        |
| 24 Spectral Width          | 37500.0                                                                                                                       |
| 25 Lowest Frequency        | -2151.2                                                                                                                       |
| 26 Nucleus                 | <sup>13</sup> C                                                                                                               |
| 27 Acquired Size           | 32768                                                                                                                         |

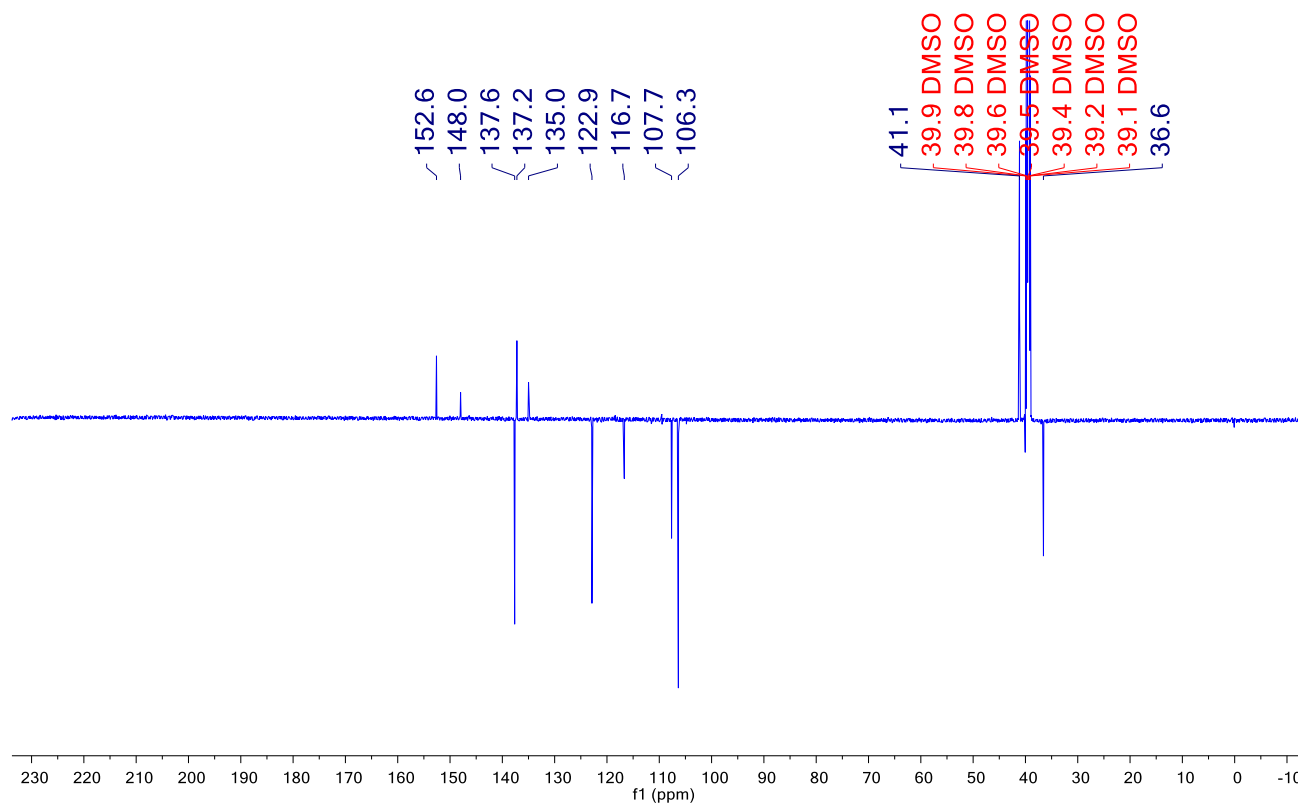

7-((1*H*-benzo[*d*]imidazol-2-yl)methyl)-2-nitroimidazo[1,2-*a*]pyrazin-8(7*H*)-one (26e)

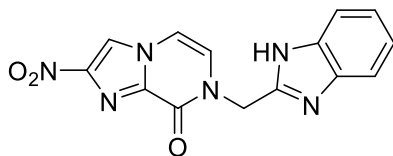

<sup>1</sup>H NMR (600 MHz, DMSO-*d*<sub>6</sub>)

| Parameter                  | Value                                                                                                                              |
|----------------------------|------------------------------------------------------------------------------------------------------------------------------------|
| 1 Data File Name           | Z:/ Projects/ 029_Anaerobic/ 029E_Chemistry/ LaboratoryNoteBooks/ CWA8967/ CWA8967_007/ NMR/ CWA8967_007_f7-9_ppt_DCM_MeOH/ 1/ fid |
| 2 Title                    | CWA8967_007_f7-9_ppt_DCM_MeOH.1.fid                                                                                                |
| 3 Comment                  | 1H NMR of CWA8967_007_f7-9_ppt_DCM_MeOH<br>1.5mg in 500uL DMSO-d6; cryoprobe                                                       |
| 4 Origin                   | Bruker BioSpin GmbH                                                                                                                |
| 5 Owner                    | nmr                                                                                                                                |
| 6 Site                     |                                                                                                                                    |
| 7 Instrument               | spect                                                                                                                              |
| 8 Author                   |                                                                                                                                    |
| 9 Solvent                  | DMSO                                                                                                                               |
| 10 Temperature             | 298.0                                                                                                                              |
| 11 Pulse Sequence          | zg                                                                                                                                 |
| 12 Experiment              | 1D                                                                                                                                 |
| 13 Probe                   | Z129649_0009 (CP TCI 600S3 H&F-C/ N-D-05 Z)                                                                                        |
| 14 Number of Scans         | 16                                                                                                                                 |
| 15 Receiver Gain           | 59.7                                                                                                                               |
| 16 Relaxation Delay        | 5.0000                                                                                                                             |
| 17 Pulse Width             | 7.0100                                                                                                                             |
| 18 Presaturation Frequency |                                                                                                                                    |
| 19 Acquisition Time        | 1.9464                                                                                                                             |
| 20 Acquisition Date        | 2018-04-03T16:07:29                                                                                                                |
| 21 Modification Date       | 2018-04-03T16:07:29                                                                                                                |
| 22 Class                   |                                                                                                                                    |
| 23 Spectrometer Frequency  | 600.13                                                                                                                             |
| 24 Spectral Width          | 8417.5                                                                                                                             |
| 25 Lowest Frequency        | -1208.1                                                                                                                            |
| 26 Nucleus                 | 1H                                                                                                                                 |
| 27 Acquired Size           | 16384                                                                                                                              |
| 28 Spectral Size           | 65536                                                                                                                              |

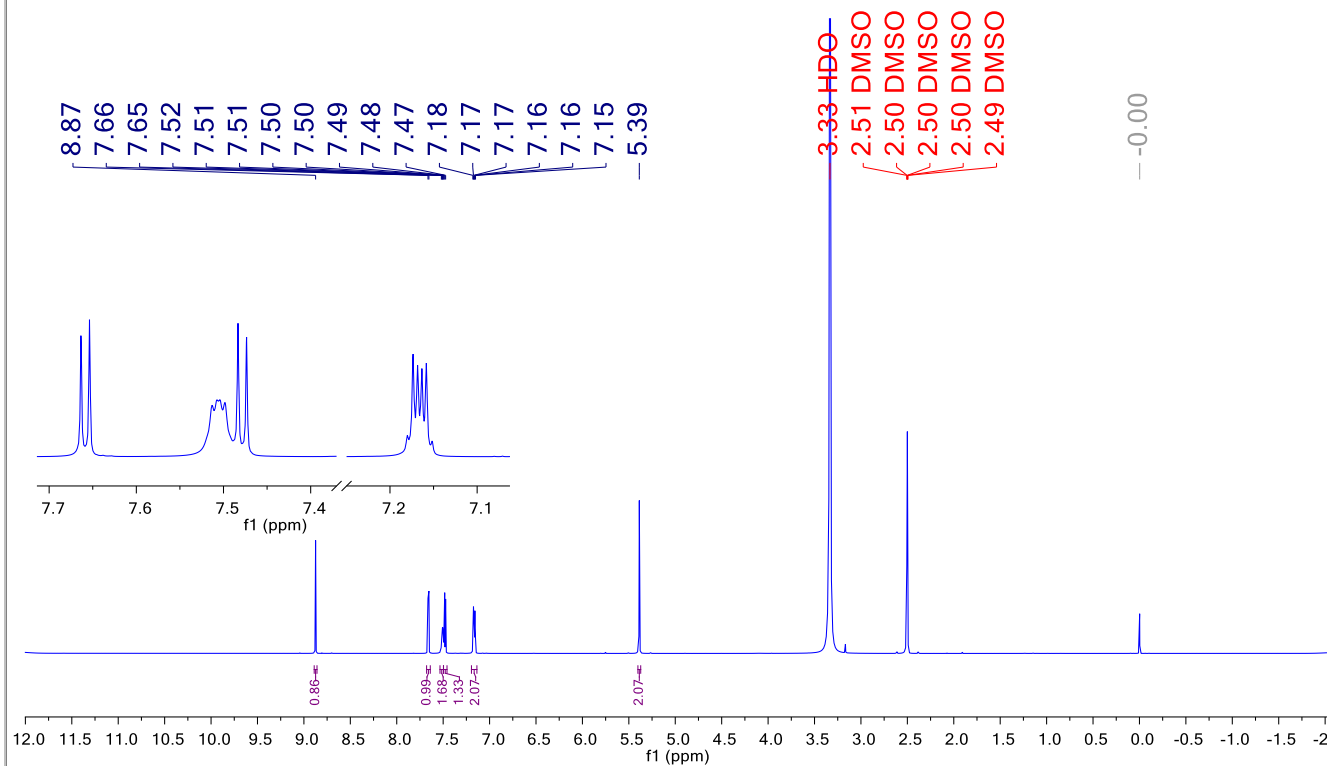

# 7-((1*H*-benzo[*d*]imidazol-2-yl)methyl)-2-nitroimidazo[1,2-*a*]pyrazin-8(7*H*)-one (26e)



## <sup>13</sup>C NMR (150 MHz, DMSO-*d*<sub>6</sub>)

| Parameter                  | Value                                       |
|----------------------------|---------------------------------------------|
| 1 Title                    | CWA8967_007_f7-9_ppt_DCM_MeOH.4.fid         |
| 2 Origin                   | Bruker BioSpin GmbH                         |
| 3 Owner                    | nmr                                         |
| 4 Spectrometer             | spect                                       |
| 5 Solvent                  | DMSO                                        |
| 6 Temperature              | 298.0                                       |
| 7 Pulse Sequence           | jmod                                        |
| 8 Experiment               | JMOD                                        |
| 9 Probe                    | Z129649_0009 (CP TCI 600S3 H&F-C/ N-D-05 Z) |
| 10 Number of Scans         | 9000                                        |
| 11 Receiver Gain           | 191.6                                       |
| 12 Relaxation Delay        | 1.0000                                      |
| 13 Pulse Width             | 11.5000                                     |
| 14 Presaturation Frequency |                                             |
| 15 Acquisition Time        | 0.8738                                      |
| 16 Acquisition Date        | 2018-04-03T22:50:43                         |
| 17 Modification Date       | 2018-04-03T22:50:43                         |
| 18 Spectrometer Frequency  | 150.92                                      |
| 19 Spectral Width          | 37500.0                                     |
| 20 Lowest Frequency        | -2151.2                                     |
| 21 Nucleus                 | <sup>13</sup> C                             |
| 22 Acquired Size           | 32768                                       |
| 23 Spectral Size           | 65536                                       |

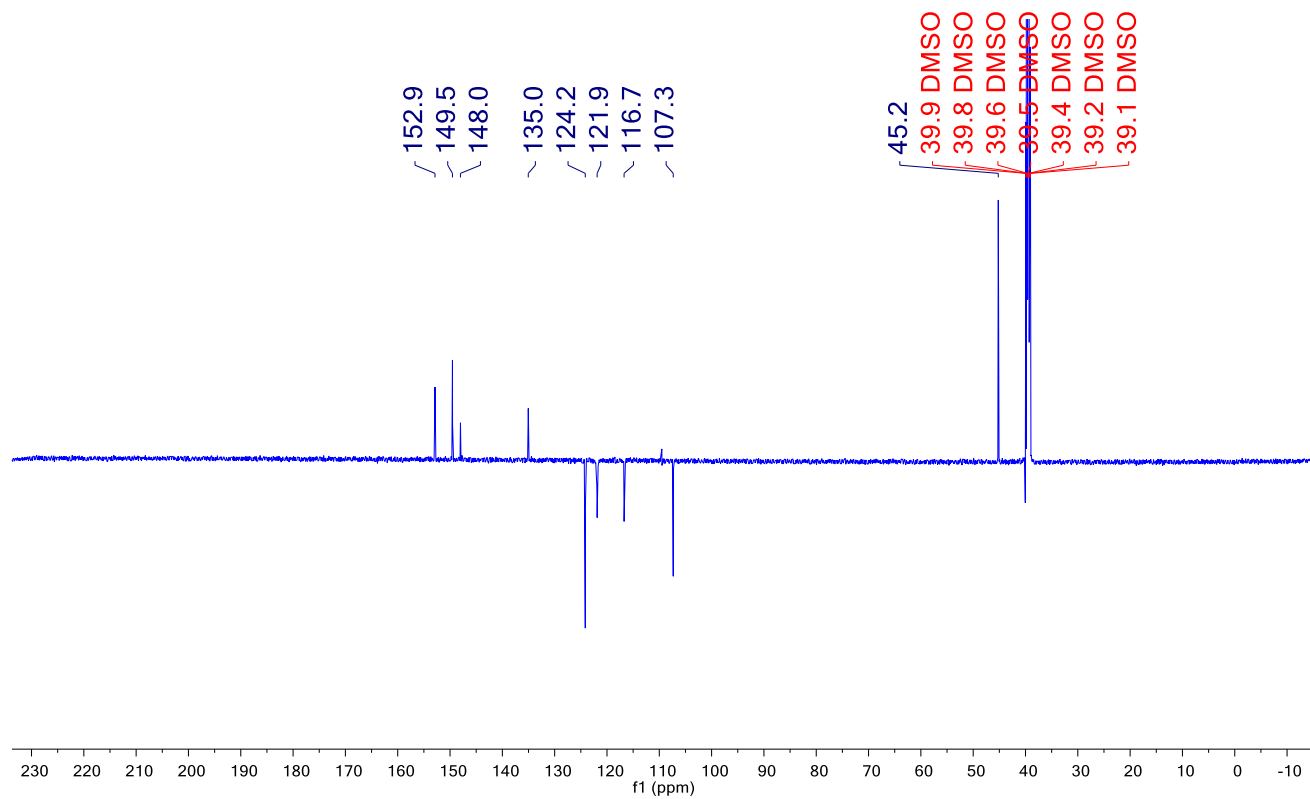

7-((1-Methyl-1H-benzo[d]imidazol-2-yl)methyl)-2-nitroimidazo[1,2-a]pyrazin-8(7H)-one (26f)

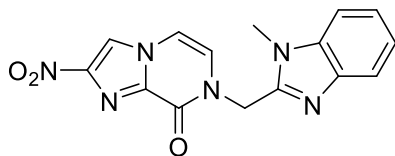

<sup>1</sup>H NMR (600 MHz, DMSO-d<sub>6</sub>)

| Parameter                  | Value                                                                                                                         |
|----------------------------|-------------------------------------------------------------------------------------------------------------------------------|
| 1 Data File Name           | Z:/ Projects/ 029_Anaerobic/ 029E_Chemistry/ LaboratoryNoteBooks/ CWA8967/ CWA8967_046/ NMR/ CWA8967_046_ppt_DCM_MeOH/ 1/ fid |
| 2 Title                    | CWA8967_046_ppt_DCM_MeOH.1.fid                                                                                                |
| 3 Comment                  | <sup>1</sup> H NMR of CWA8967_046_ppt_DCM_MeOH 1mg in 500uL DMSO-d <sub>6</sub> ; cryoprobe                                   |
| 4 Origin                   | Bruker BioSpin GmbH                                                                                                           |
| 5 Owner                    | nmr                                                                                                                           |
| 6 Site                     |                                                                                                                               |
| 7 Instrument               | spect                                                                                                                         |
| 8 Author                   |                                                                                                                               |
| 9 Solvent                  | DMSO                                                                                                                          |
| 10 Temperature             | 298.0                                                                                                                         |
| 11 Pulse Sequence          | zg                                                                                                                            |
| 12 Experiment              | 1D                                                                                                                            |
| 13 Probe                   | Z129649_0009 (CP TCI 600S3 H&F-C/ N-D-05 Z)                                                                                   |
| 14 Number of Scans         | 64                                                                                                                            |
| 15 Receiver Gain           | 109.3                                                                                                                         |
| 16 Relaxation Delay        | 5.0000                                                                                                                        |
| 17 Pulse Width             | 8.0000                                                                                                                        |
| 18 Presaturation Frequency |                                                                                                                               |
| 19 Acquisition Time        | 1.9464                                                                                                                        |
| 20 Acquisition Date        | 2018-05-09T12:07:23                                                                                                           |
| 21 Modification Date       | 2018-05-09T12:07:24                                                                                                           |
| 22 Class                   |                                                                                                                               |
| 23 Spectrometer Frequency  | 600.13                                                                                                                        |
| 24 Spectral Width          | 8417.5                                                                                                                        |
| 25 Lowest Frequency        | -1208.1                                                                                                                       |

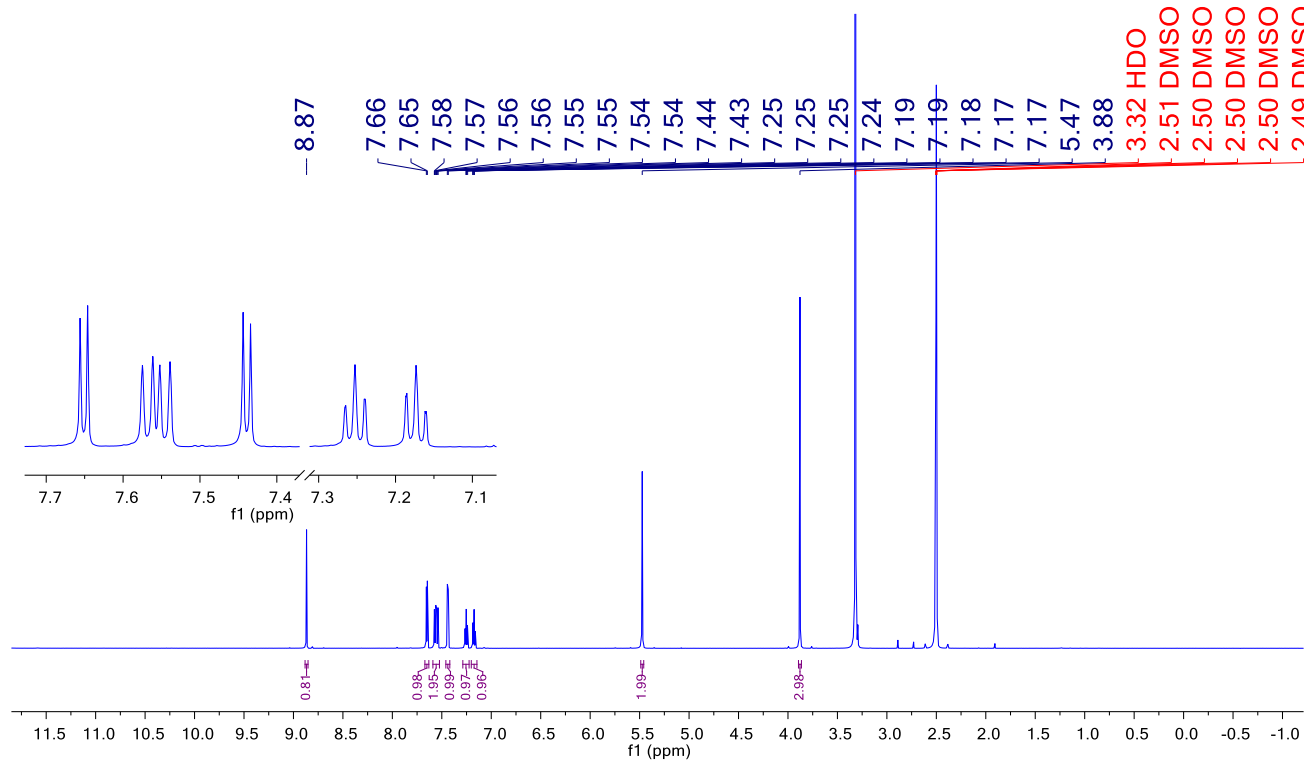

7-((1-Methyl-1H-benzo[d]imidazol-2-yl)methyl)-2-nitroimidazo[1,2-a]pyrazin-8(7H)-one (26f)



<sup>13</sup>C NMR (150 MHz, DMSO-*d*<sub>6</sub>)

| Parameter                  | Value                                          |
|----------------------------|------------------------------------------------|
| 1 Title                    | CWA8967_046_ppt_DCM_MeOH.4.fid                 |
| 2 Origin                   | Bruker BioSpin GmbH                            |
| 3 Owner                    | nmr                                            |
| 4 Spectrometer             | spect                                          |
| 5 Solvent                  | DMSO                                           |
| 6 Temperature              | 298.0                                          |
| 7 Pulse Sequence           | jmod                                           |
| 8 Experiment               | JMOD                                           |
| 9 Probe                    | Z129649_0009 (CP TCI 600S3 H&F-C/<br>N-D-05 Z) |
| 10 Number of Scans         | 11000                                          |
| 11 Receiver Gain           | 191.6                                          |
| 12 Relaxation Delay        | 1.0000                                         |
| 13 Pulse Width             | 12.0000                                        |
| 14 Presaturation Frequency |                                                |
| 15 Acquisition Time        | 0.8738                                         |
| 16 Acquisition Date        | 2018-05-10T00:31:53                            |
| 17 Modification Date       | 2018-05-10T00:31:53                            |
| 18 Spectrometer Frequency  | 150.92                                         |
| 19 Spectral Width          | 37500.0                                        |
| 20 Lowest Frequency        | -2151.2                                        |
| 21 Nucleus                 | <sup>13</sup> C                                |
| 22 Acquired Size           | 32768                                          |
| 23 Spectral Size           | 65536                                          |

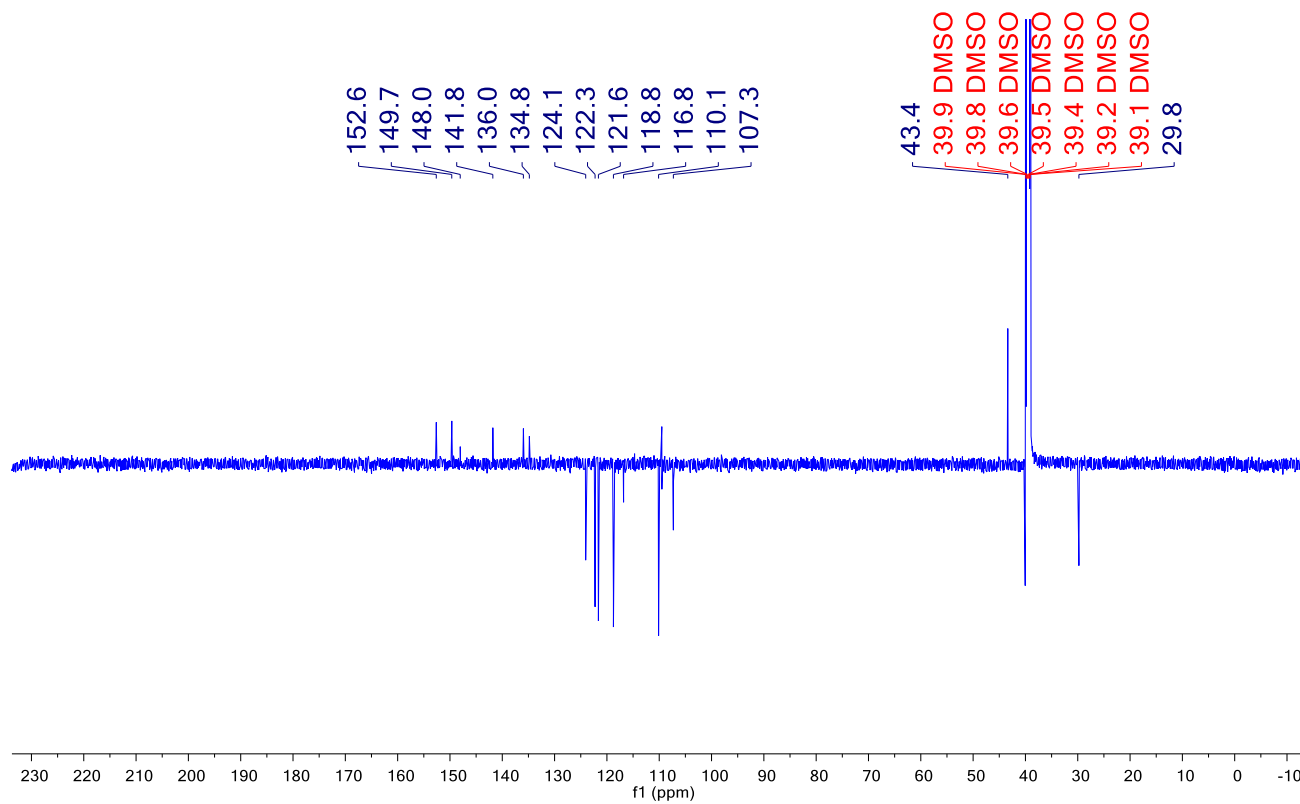

## 2-Nitro-7-(pyridin-3-ylmethyl)imidazo[1,2-a]pyrazin-8(7H)-one (26g)

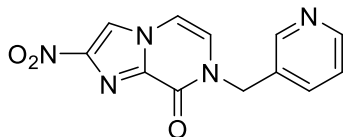

### <sup>1</sup>H NMR (600 MHz, DMSO-d<sub>6</sub>)

| Parameter                  | Value                                          |
|----------------------------|------------------------------------------------|
| 1 Title                    | CWA8692_064_repurified_com<br>bined1.1.fid     |
| 2 Origin                   | Bruker BioSpin GmbH                            |
| 3 Owner                    | nmr                                            |
| 4 Spectrometer             | spect                                          |
| 5 Solvent                  | DMSO                                           |
| 6 Temperature              | 291.7                                          |
| 7 Pulse Sequence           | zg                                             |
| 8 Experiment               | 1D                                             |
| 9 Probe                    | Z129649_0009 (CP TCI 600S3<br>H&F-C/ N-D-05 Z) |
| 10 Number of Scans         | 32                                             |
| 11 Receiver Gain           | 155.2                                          |
| 12 Relaxation Delay        | 5.0000                                         |
| 13 Pulse Width             | 8.0000                                         |
| 14 Presaturation Frequency |                                                |
| 15 Acquisition Time        | 1.9464                                         |
| 16 Acquisition Date        | 2019-06-19T17:14:50                            |
| 17 Modification Date       | 2019-06-19T17:14:50                            |
| 18 Spectrometer Frequency  | 600.13                                         |
| 19 Spectral Width          | 8417.5                                         |
| 20 Lowest Frequency        | -1208.1                                        |
| 21 Nucleus                 | 1H                                             |
| 22 Acquired Size           | 16384                                          |
| 23 Spectral Size           | 65536                                          |

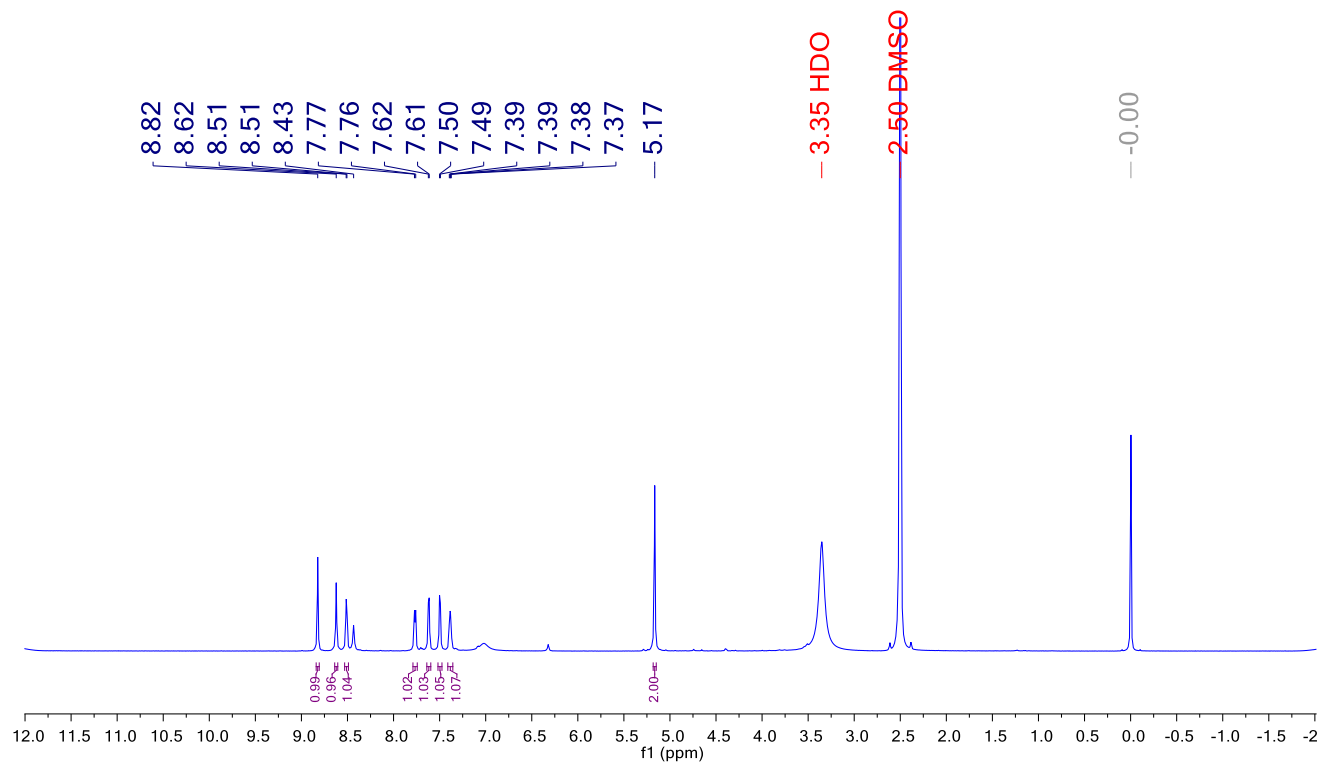



## 2-Nitro-7-(pyridin-3-ylmethyl)imidazo[1,2-a]pyrazin-8(7H)-one (26g)

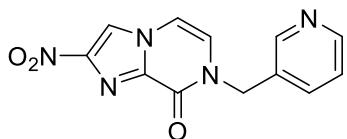

### <sup>13</sup>C NMR (150 MHz, DMSO-*d*<sub>6</sub>)

| Parameter                  | Value                                          |
|----------------------------|------------------------------------------------|
| 1 Title                    | CWA8692_064_repurified_com<br>bined1.2.fid     |
| 2 Origin                   | Bruker BioSpin GmbH                            |
| 3 Owner                    | nmr                                            |
| 4 Spectrometer             | spect                                          |
| 5 Solvent                  | DMSO                                           |
| 6 Temperature              | 291.7                                          |
| 7 Pulse Sequence           | jmod                                           |
| 8 Experiment               | JMOD                                           |
| 9 Probe                    | Z129649_0009 (CP TCI 600S3<br>H&F-C/ N-D-05 Z) |
| 10 Number of Scans         | 10000                                          |
| 11 Receiver Gain           | 191.6                                          |
| 12 Relaxation Delay        | 1.0000                                         |
| 13 Pulse Width             | 12.0000                                        |
| 14 Presaturation Frequency |                                                |
| 15 Acquisition Time        | 0.8738                                         |
| 16 Acquisition Date        | 2019-06-19T22:47:09                            |
| 17 Modification Date       | 2019-06-19T22:47:09                            |
| 18 Spectrometer Frequency  | 150.92                                         |
| 19 Spectral Width          | 37500.0                                        |
| 20 Lowest Frequency        | -2151.2                                        |
| 21 Nucleus                 | 13C                                            |
| 22 Acquired Size           | 32768                                          |
| 23 Spectral Size           | 65536                                          |

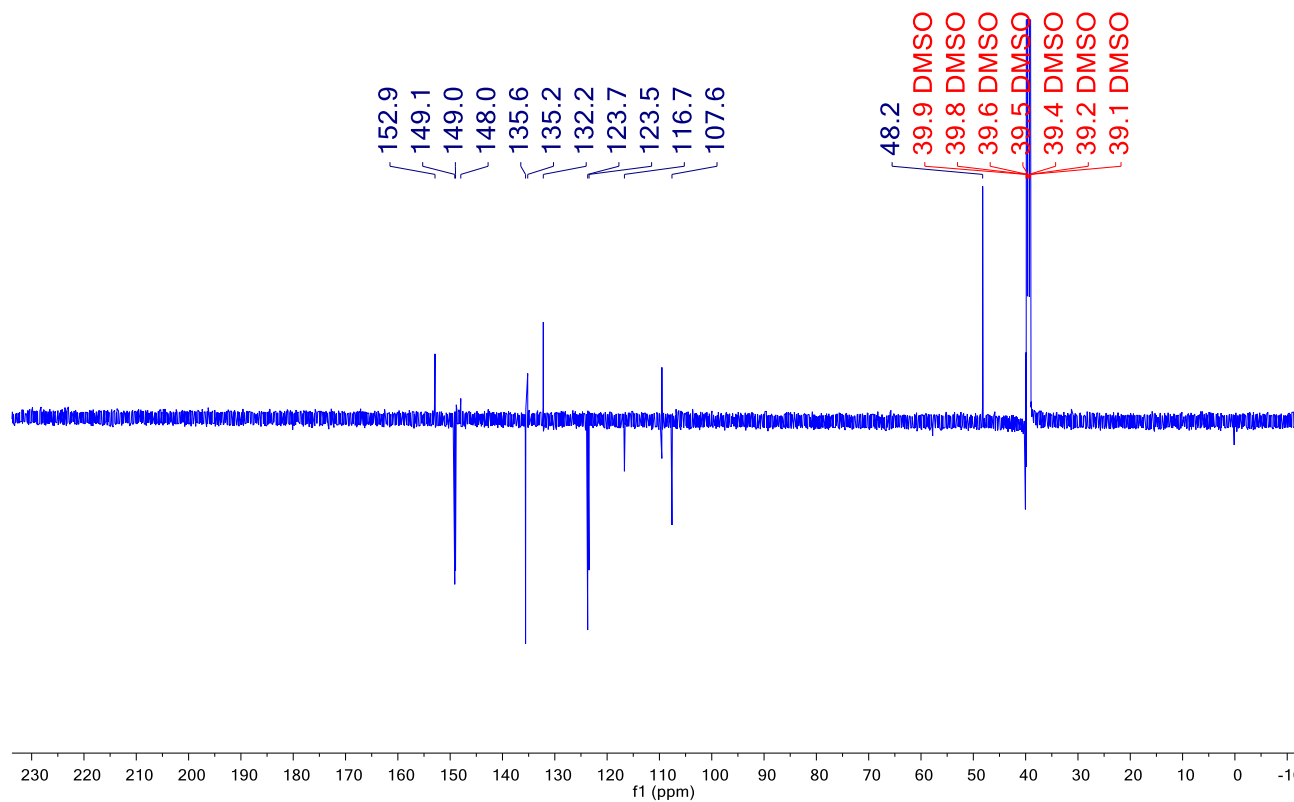

## 2-Nitro-7-((6-(trifluoromethyl)pyridin-3-yl)methyl)imidazo[1,2-a]pyrazin-8(7H)-one (26h)

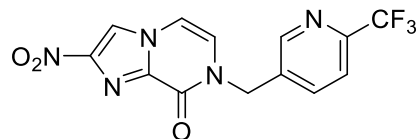

### <sup>1</sup>H NMR (600 MHz, DMSO-d<sub>6</sub>)

| Parameter                  | Value                                          |
|----------------------------|------------------------------------------------|
| 1 Title                    | CWA9171_103_filtrate_f3_cry<br>oprobe.1.fid    |
| 2 Origin                   | Bruker BioSpin GmbH                            |
| 3 Owner                    | nmr                                            |
| 4 Spectrometer             | spect                                          |
| 5 Solvent                  | DMSO                                           |
| 6 Temperature              | 298.0                                          |
| 7 Pulse Sequence           | zg                                             |
| 8 Experiment               | 1D                                             |
| 9 Probe                    | Z129649_0009 (CP TCI 600S3<br>H&F-C/ N-D-05 Z) |
| 10 Number of Scans         | 16                                             |
| 11 Receiver Gain           | 59.7                                           |
| 12 Relaxation Delay        | 5.0000                                         |
| 13 Pulse Width             | 8.0000                                         |
| 14 Presaturation Frequency |                                                |
| 15 Acquisition Time        | 1.9464                                         |
| 16 Acquisition Date        | 2019-05-01T17:17:49                            |
| 17 Modification Date       | 2019-05-01T17:17:49                            |
| 18 Spectrometer Frequency  | 600.13                                         |
| 19 Spectral Width          | 8417.5                                         |
| 20 Lowest Frequency        | -1208.1                                        |
| 21 Nucleus                 | <sup>1</sup> H                                 |
| 22 Acquired Size           | 16384                                          |
| 23 Spectral Size           | 65536                                          |

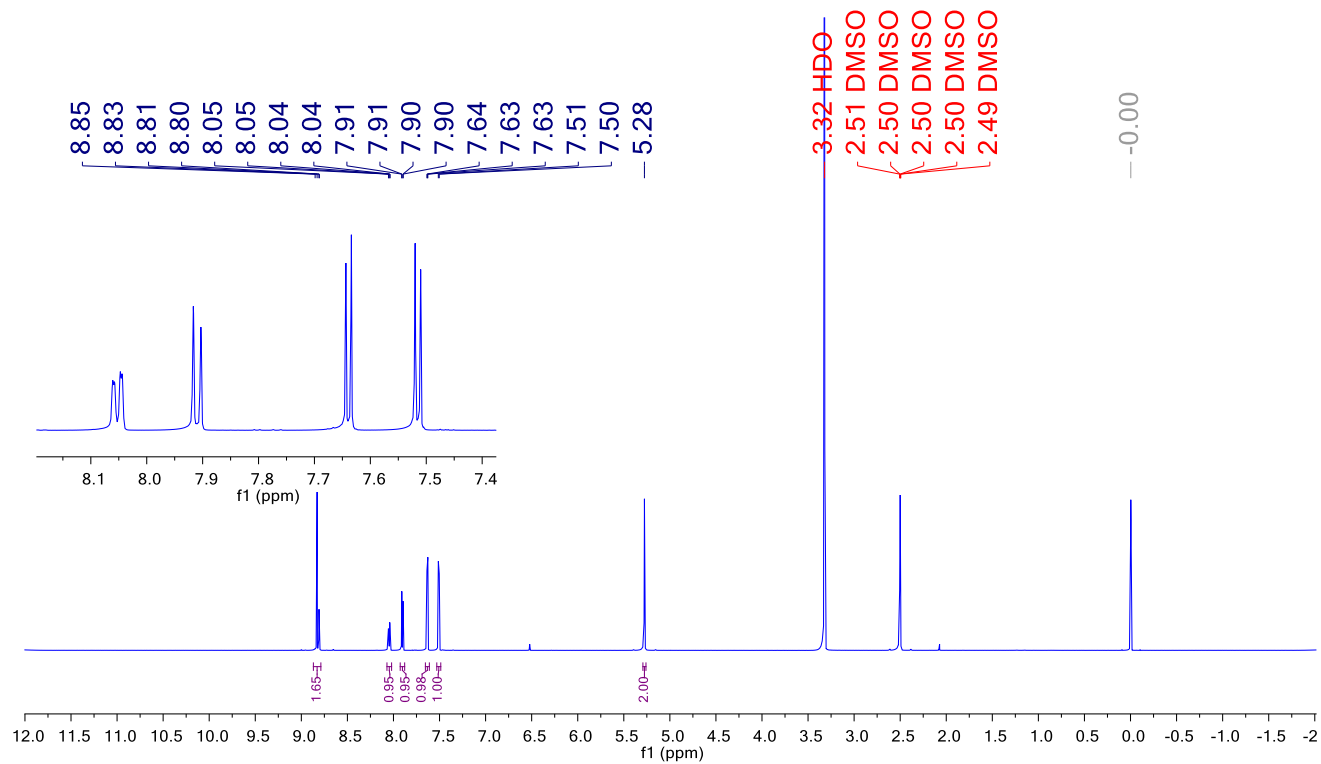

## 2-Nitro-7-((6-(trifluoromethyl)pyridin-3-yl)methyl)imidazo[1,2-a]pyrazin-8(7H)-one (26h)



### <sup>13</sup>C NMR (150 MHz, DMSO-*d*<sub>6</sub>)

| Parameter                  | Value                                          |
|----------------------------|------------------------------------------------|
| 1 Title                    | CWA9171_103_filttrate_f3_cry<br>oprobe.2.fid   |
| 2 Origin                   | Bruker BioSpin GmbH                            |
| 3 Owner                    | nmr                                            |
| 4 Spectrometer             | spect                                          |
| 5 Solvent                  | DMSO                                           |
| 6 Temperature              | 298.0                                          |
| 7 Pulse Sequence           | jmod                                           |
| 8 Experiment               | JMOD                                           |
| 9 Probe                    | Z129649_0009 (CP TCI 600S3<br>H&F-C/ N-D-05 Z) |
| 10 Number of Scans         | 7500                                           |
| 11 Receiver Gain           | 191.6                                          |
| 12 Relaxation Delay        | 1.0000                                         |
| 13 Pulse Width             | 12.0000                                        |
| 14 Presaturation Frequency |                                                |
| 15 Acquisition Time        | 0.8738                                         |
| 16 Acquisition Date        | 2019-05-01T21:18:17                            |
| 17 Modification Date       | 2019-05-01T21:18:17                            |
| 18 Spectrometer Frequency  | 150.92                                         |
| 19 Spectral Width          | 37500.0                                        |
| 20 Lowest Frequency        | -2151.2                                        |
| 21 Nucleus                 | 13C                                            |
| 22 Acquired Size           | 32768                                          |
| 23 Spectral Size           | 65536                                          |

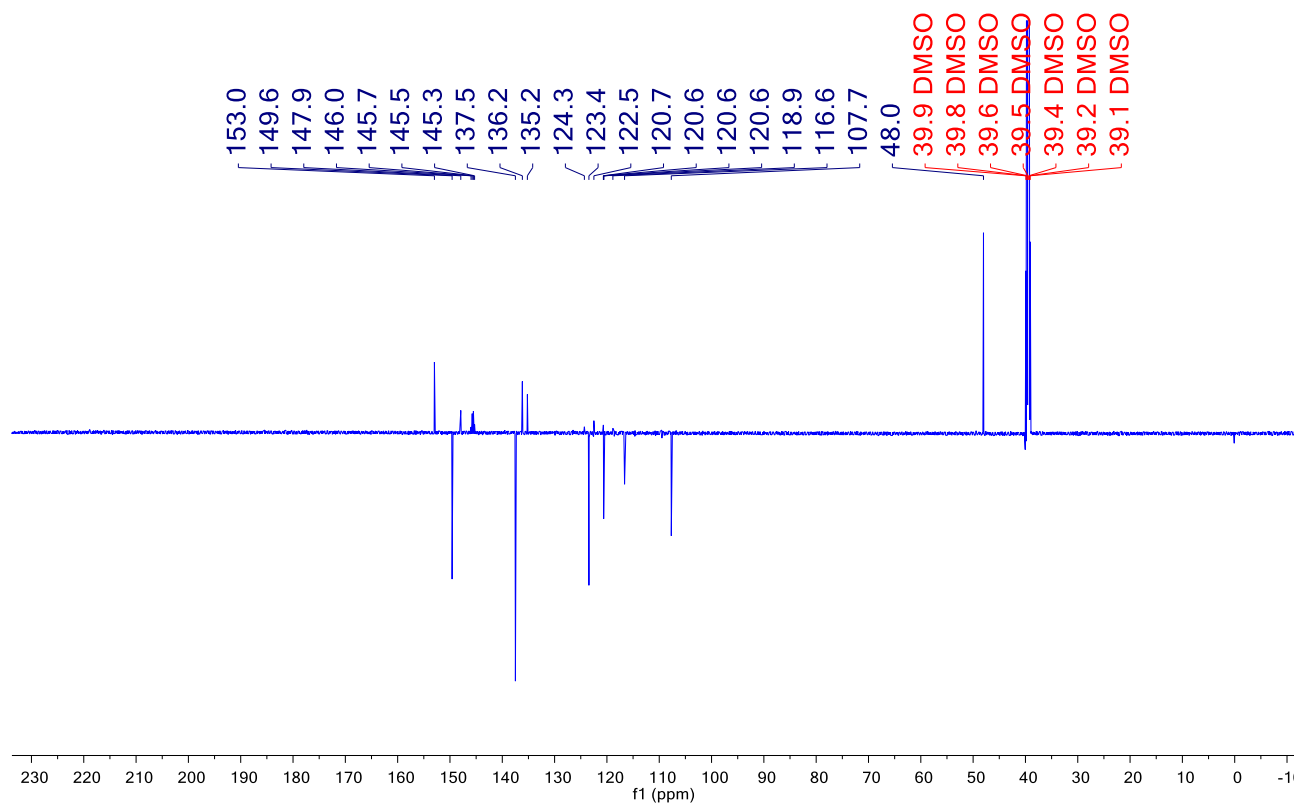

## 2-Nitro-7-(pyrazin-2-ylmethyl)imidazo[1,2-a]pyrazin-8(7H)-one (26i)

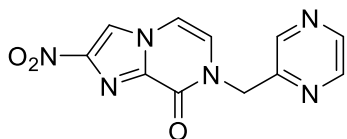

### <sup>1</sup>H NMR (600 MHz, DMSO-d<sub>6</sub>)

| Parameter                  | Value                                                                                                                         |
|----------------------------|-------------------------------------------------------------------------------------------------------------------------------|
| 1 Data File Name           | Z:/ Projects/ 029_Anaerobic/ 029E_Chemistry/ LaboratoryNoteBooks/ CWA8805/ CWA8805_111/ NMR/ CWA8805_111_ppt_DCM_MeOH/ 1/ fid |
| 2 Title                    | CWA8805_111_ppt_DCM_MeOH.1.fid                                                                                                |
| 3 Comment                  | <sup>1</sup> H NMR of CWA8805_111_ppt_DCM_MeOH 1mg in 480uL DMSO-d <sub>6</sub> ; cryoprobe                                   |
| 4 Origin                   | Bruker BioSpin GmbH                                                                                                           |
| 5 Owner                    | nmr                                                                                                                           |
| 6 Site                     |                                                                                                                               |
| 7 Instrument               | spect                                                                                                                         |
| 8 Author                   |                                                                                                                               |
| 9 Solvent                  | DMSO                                                                                                                          |
| 10 Temperature             | 298.0                                                                                                                         |
| 11 Pulse Sequence          | zg                                                                                                                            |
| 12 Experiment              | 1D                                                                                                                            |
| 13 Probe                   | Z129649_0009 (CP TCI 600S3 H&F-C/ N-D-05 Z)                                                                                   |
| 14 Number of Scans         | 32                                                                                                                            |
| 15 Receiver Gain           | 116.1                                                                                                                         |
| 16 Relaxation Delay        | 5.0000                                                                                                                        |
| 17 Pulse Width             | 7.0100                                                                                                                        |
| 18 Presaturation Frequency |                                                                                                                               |
| 19 Acquisition Time        | 1.9464                                                                                                                        |
| 20 Acquisition Date        | 2018-03-09T15:03:45                                                                                                           |
| 21 Modification Date       | 2018-03-09T15:03:45                                                                                                           |
| 22 Class                   |                                                                                                                               |
| 23 Spectrometer Frequency  | 600.13                                                                                                                        |
| 24 Spectral Width          | 8417.5                                                                                                                        |
| 25 Lowest Frequency        | -1208.1                                                                                                                       |
| 26 Nucleus                 | <sup>1</sup> H                                                                                                                |
| 27 Acquired Size           | 16384                                                                                                                         |

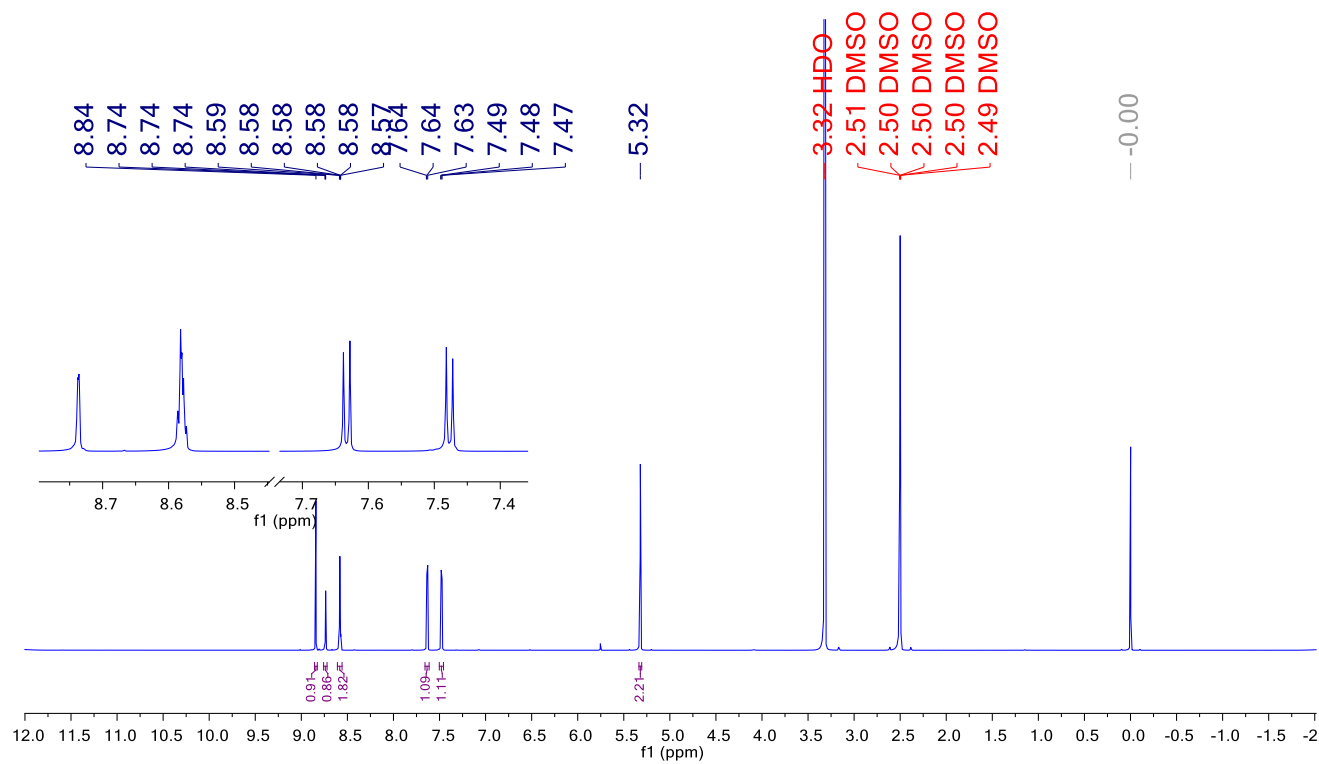

## 2-Nitro-7-(pyrazin-2-ylmethyl)imidazo[1,2-a]pyrazin-8(7H)-one (26i)



### <sup>13</sup>C NMR (150 MHz, DMSO-d<sub>6</sub>)

| Parameter                  | Value                                                                                                                         |
|----------------------------|-------------------------------------------------------------------------------------------------------------------------------|
| 1 Data File Name           | Z:/ Projects/ 029_Anaerobic/ 029E_Chemistry/ LaboratoryNoteBooks/ CWA8805/ CWA8805_111/ NMR/ CWA8805_111_ppt_DCM_MeOH/ 2/ fid |
| 2 Title                    | CWA8805_111_ppt_DCM_MeOH.2.fid                                                                                                |
| 3 Comment                  | <sup>13</sup> C JMOD NMR of CWA8805_111_ppt_DCM_MeOH 1mg in 480uL DMSO-d <sub>6</sub> ; cryoprobe                             |
| 4 Origin                   | Bruker BioSpin GmbH                                                                                                           |
| 5 Owner                    | nmr                                                                                                                           |
| 6 Site                     |                                                                                                                               |
| 7 Instrument               | spect                                                                                                                         |
| 8 Author                   |                                                                                                                               |
| 9 Solvent                  | DMSO                                                                                                                          |
| 10 Temperature             | 298.0                                                                                                                         |
| 11 Pulse Sequence          | jmod                                                                                                                          |
| 12 Experiment              | JMOD                                                                                                                          |
| 13 Probe                   | Z129649_0009 (CP TCI 600S3 H&F-C/ N-D-05 Z)                                                                                   |
| 14 Number of Scans         | 9000                                                                                                                          |
| 15 Receiver Gain           | 191.6                                                                                                                         |
| 16 Relaxation Delay        | 1.0000                                                                                                                        |
| 17 Pulse Width             | 11.5000                                                                                                                       |
| 18 Presaturation Frequency |                                                                                                                               |
| 19 Acquisition Time        | 0.8738                                                                                                                        |
| 20 Acquisition Date        | 2018-03-09T21:58:02                                                                                                           |
| 21 Modification Date       | 2018-03-09T21:58:02                                                                                                           |
| 22 Class                   |                                                                                                                               |
| 23 Spectrometer Frequency  | 150.92                                                                                                                        |
| 24 Spectral Width          | 37500.0                                                                                                                       |
| 25 Lowest Frequency        | -2151.2                                                                                                                       |
| 26 Nucleus                 | <sup>13</sup> C                                                                                                               |
| 27 Acquired Size           | 32768                                                                                                                         |
| 28 Spectral Size           | 65536                                                                                                                         |

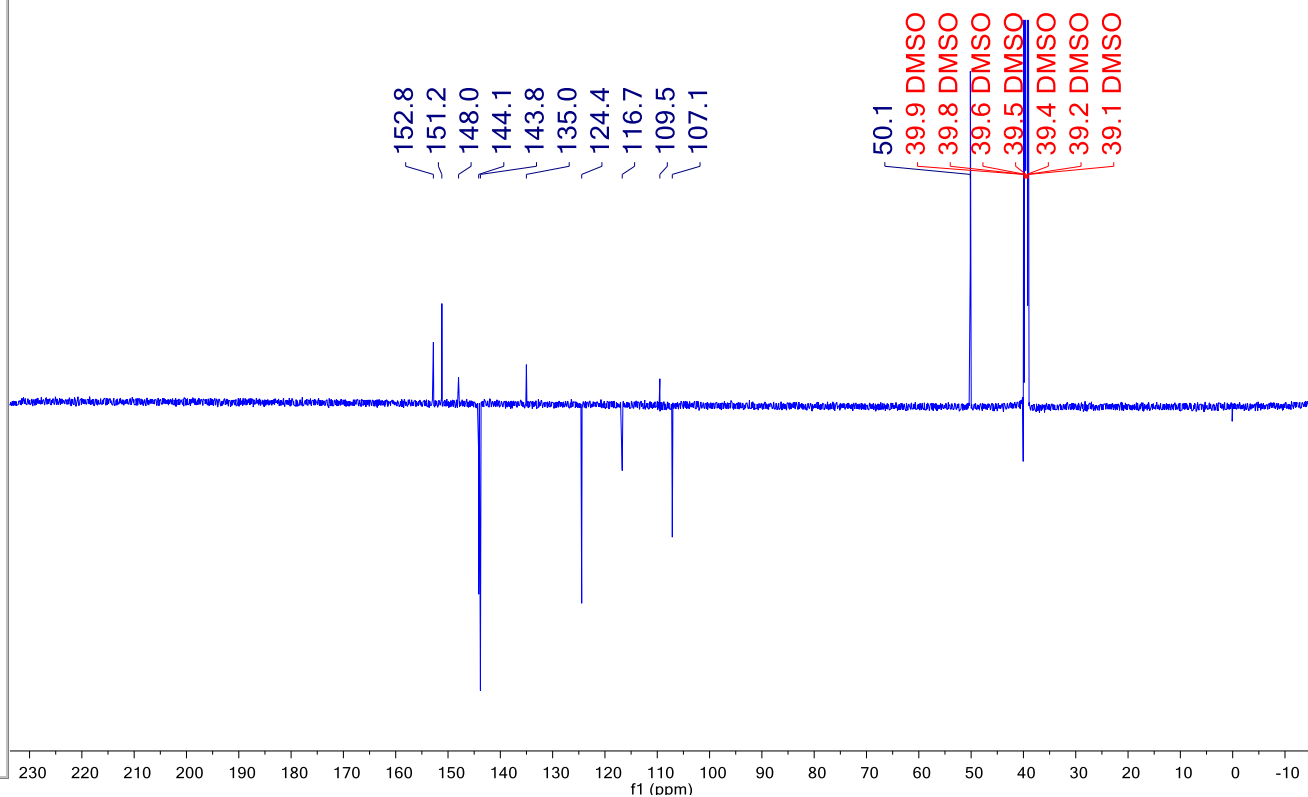

## 2-Nitro-7-(quinolin-6-ylmethyl)imidazo[1,2-a]pyrazin-8(7H)-one (26j)

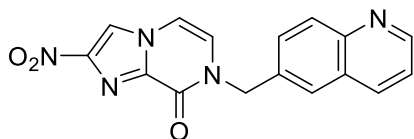

### <sup>1</sup>H NMR (600 MHz, DMSO-d<sub>6</sub>)

| Parameter                  | Value                                                                                                                                  |
|----------------------------|----------------------------------------------------------------------------------------------------------------------------------------|
| 1 Data File Name           | Z:/ Projects/ 029_Anaerobic/ 029E_Chemistry/ Laboratory/NoteBooks/ CWA8967/ CWA8967_044/ NMR/ CWA8967_044_f16-40_ppt_D CM_MeOH/ 1/ fid |
| 2 Title                    | CWA8967_044_f16-40_ppt_D CM_MeOH.1.fid                                                                                                 |
| 3 Comment                  | <sup>1</sup> H NMR of CWA8967_044_f16-40_ppt_D CM_MeOH 1.7mg in 500uL DMSO-d <sub>6</sub> ; cryoprobe                                  |
| 4 Origin                   | Bruker BioSpin GmbH                                                                                                                    |
| 5 Owner                    | nmr                                                                                                                                    |
| 6 Site                     |                                                                                                                                        |
| 7 Instrument               | spect                                                                                                                                  |
| 8 Author                   |                                                                                                                                        |
| 9 Solvent                  | DMSO                                                                                                                                   |
| 10 Temperature             | 298.0                                                                                                                                  |
| 11 Pulse Sequence          | zg                                                                                                                                     |
| 12 Experiment              | 1D                                                                                                                                     |
| 13 Probe                   | Z129649_0009 (CP TCI 600S3 H&F-C/ N-D-05 Z)                                                                                            |
| 14 Number of Scans         | 32                                                                                                                                     |
| 15 Receiver Gain           | 140.4                                                                                                                                  |
| 16 Relaxation Delay        | 5.0000                                                                                                                                 |
| 17 Pulse Width             | 8.0000                                                                                                                                 |
| 18 Presaturation Frequency |                                                                                                                                        |
| 19 Acquisition Time        | 1.9464                                                                                                                                 |
| 20 Acquisition Date        | 2018-05-11T11:21:13                                                                                                                    |
| 21 Modification Date       | 2018-05-11T11:21:13                                                                                                                    |
| 22 Class                   |                                                                                                                                        |
| 23 Spectrometer Frequency  | 600.13                                                                                                                                 |
| 24 Spectral Width          | 8417.5                                                                                                                                 |
| 25 Lowest Frequency        | -1208.1                                                                                                                                |
| 26 Nucleus                 | <sup>1</sup> H                                                                                                                         |
| 27 Acquired Size           | 16384                                                                                                                                  |

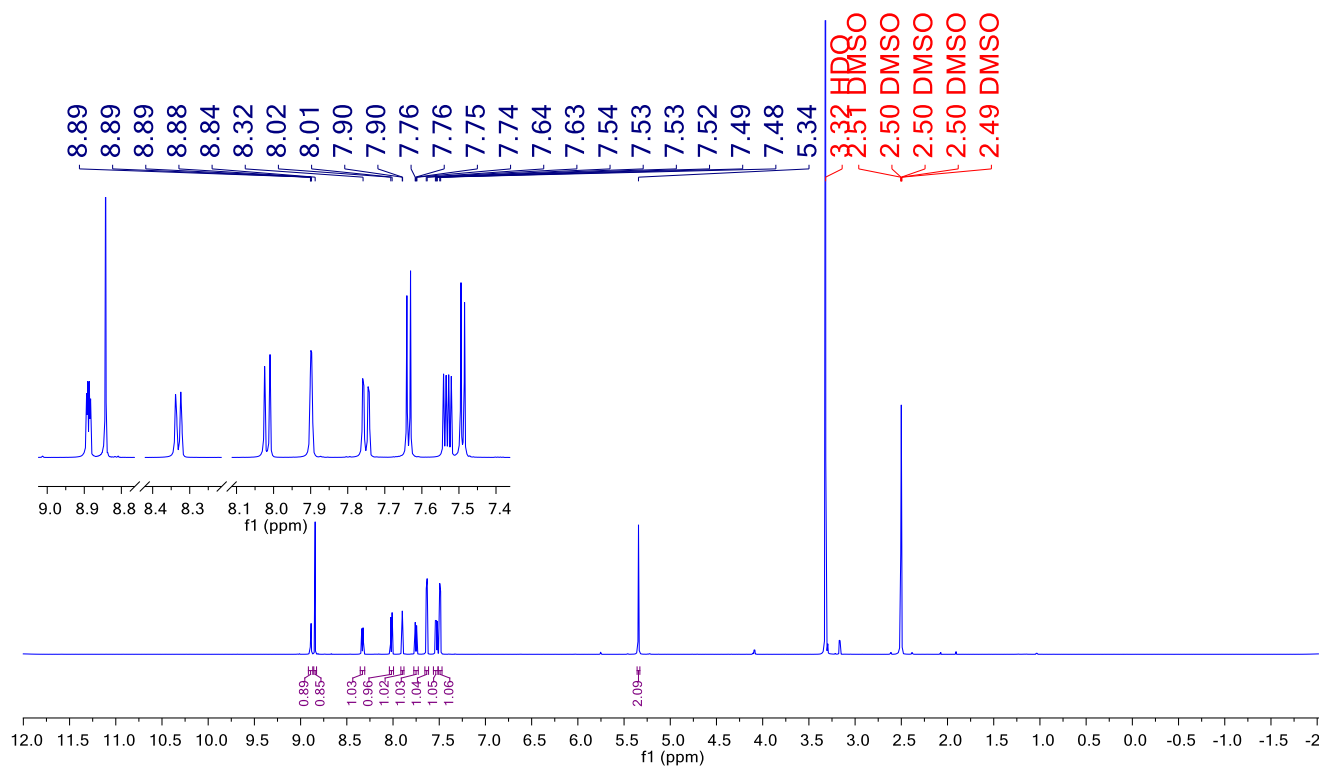

## 2-Nitro-7-(quinolin-6-ylmethyl)imidazo[1,2-a]pyrazin-8(7H)-one (26j)



### <sup>13</sup>C NMR (150 MHz, DMSO-d<sub>6</sub>)

| Parameter                  | Value                                                                                                                                 |
|----------------------------|---------------------------------------------------------------------------------------------------------------------------------------|
| 1 Data File Name           | Z:/ Projects/ 029_Anaerobic/ 029E_Chemistry/ LaboratoryNoteBooks/ CWA8967/ CWA8967_044/ NMR/ CWA8967_044_f16-40_ppt_D CM_MeOH/ 2/ fid |
| 2 Title                    | CWA8967_044_f16-40_ppt_D CM_MeOH.2.fid                                                                                                |
| 3 Comment                  | <sup>13</sup> C JMOD NMR of CWA8967_044_f16-40_ppt_D CM_MeOH 1.7mg in 500uL DMSO-d <sub>6</sub> ; cryoprobe                           |
| 4 Origin                   | Bruker BioSpin GmbH                                                                                                                   |
| 5 Owner                    | nmr                                                                                                                                   |
| 6 Site                     |                                                                                                                                       |
| 7 Instrument               | spect                                                                                                                                 |
| 8 Author                   |                                                                                                                                       |
| 9 Solvent                  | DMSO                                                                                                                                  |
| 10 Temperature             | 298.0                                                                                                                                 |
| 11 Pulse Sequence          | jmod                                                                                                                                  |
| 12 Experiment              | JMOD                                                                                                                                  |
| 13 Probe                   | Z129649_0009 (CP TCI 600S3 H&F-C/ N-D-05 Z)                                                                                           |
| 14 Number of Scans         | 7500                                                                                                                                  |
| 15 Receiver Gain           | 191.6                                                                                                                                 |
| 16 Relaxation Delay        | 1.0000                                                                                                                                |
| 17 Pulse Width             | 12.0000                                                                                                                               |
| 18 Presaturation Frequency |                                                                                                                                       |
| 19 Acquisition Time        | 0.8738                                                                                                                                |
| 20 Acquisition Date        | 2018-05-15T20:10:48                                                                                                                   |
| 21 Modification Date       | 2018-05-15T20:10:49                                                                                                                   |
| 22 Class                   |                                                                                                                                       |
| 23 Spectrometer Frequency  | 150.92                                                                                                                                |
| 24 Spectral Width          | 37500.0                                                                                                                               |
| 25 Lowest Frequency        | -2151.2                                                                                                                               |
| 26 Nucleus                 | <sup>13</sup> C                                                                                                                       |
| 27 Acquired Size           | 32768                                                                                                                                 |
| 28 Spectral Size           | 65536                                                                                                                                 |

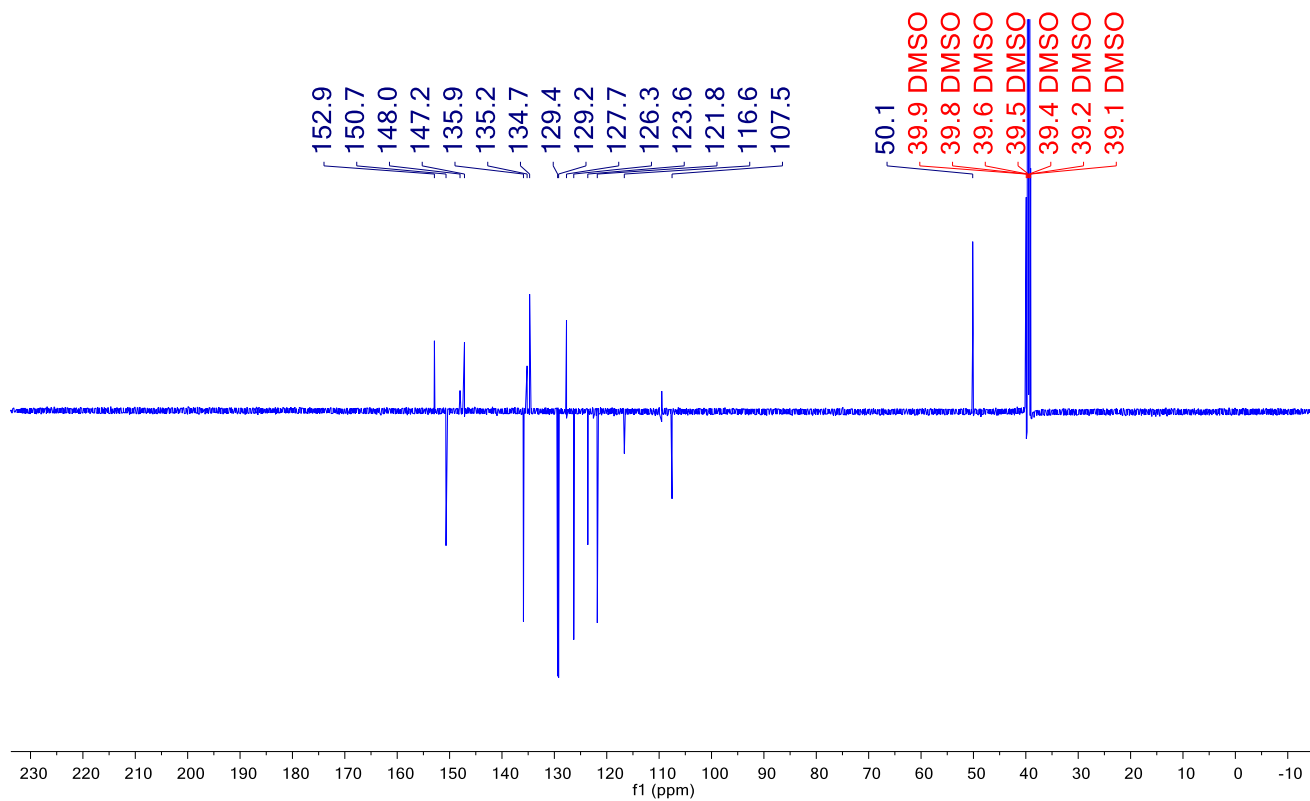

**7-(Benzo[d][1,3]dioxol-5-ylmethyl)-2-nitroimidazo[1,2-a]pyrazin-8(7H)-one (26k)**

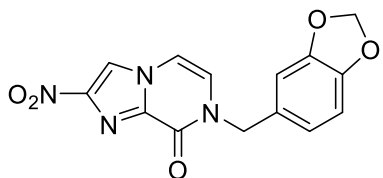

**<sup>1</sup>H NMR (600 MHz, DMSO-d<sub>6</sub>)**

| Parameter                  | Value                                                                                                                         |
|----------------------------|-------------------------------------------------------------------------------------------------------------------------------|
| 1 Data File Name           | Z:/ Projects/ 029_Anaerobic/ 029E_Chemistry/ LaboratoryNoteBooks/ CWA8805/ CWA8805_073/ NMR/ CWA8805_073_ppt_DCM_MeOH/ 1/ fid |
| 2 Title                    | CWA8805_073_ppt_DCM_MeOH.1.fid                                                                                                |
| 3 Comment                  | <sup>1</sup> H NMR of CWA8805_073_ppt_DCM_MeOH 2.2mg in 500uL DMSO-d <sub>6</sub> ; LC-NMR AA_1H DMSO C:\ c.ang 10            |
| 4 Origin                   | Bruker BioSpin GmbH                                                                                                           |
| 5 Owner                    | biodiversity                                                                                                                  |
| 6 Site                     |                                                                                                                               |
| 7 Instrument               | spect                                                                                                                         |
| 8 Author                   |                                                                                                                               |
| 9 Solvent                  | DMSO                                                                                                                          |
| 10 Temperature             | 298.0                                                                                                                         |
| 11 Pulse Sequence          | zg                                                                                                                            |
| 12 Experiment              | 1D                                                                                                                            |
| 13 Probe                   | 5 mm PASEI 1H/ D-13C Z-GRD Z866801/ 0003                                                                                      |
| 14 Number of Scans         | 16                                                                                                                            |
| 15 Receiver Gain           | 287.0                                                                                                                         |
| 16 Relaxation Delay        | 5.0000                                                                                                                        |
| 17 Pulse Width             | 9.8000                                                                                                                        |
| 18 Presaturation Frequency |                                                                                                                               |
| 19 Acquisition Time        | 1.9465                                                                                                                        |
| 20 Acquisition Date        | 2018-01-31T17:24:00                                                                                                           |
| 21 Modification Date       | 2018-01-31T17:25:06                                                                                                           |
| 22 Class                   |                                                                                                                               |
| 23 Spectrometer Frequency  | 600.08                                                                                                                        |

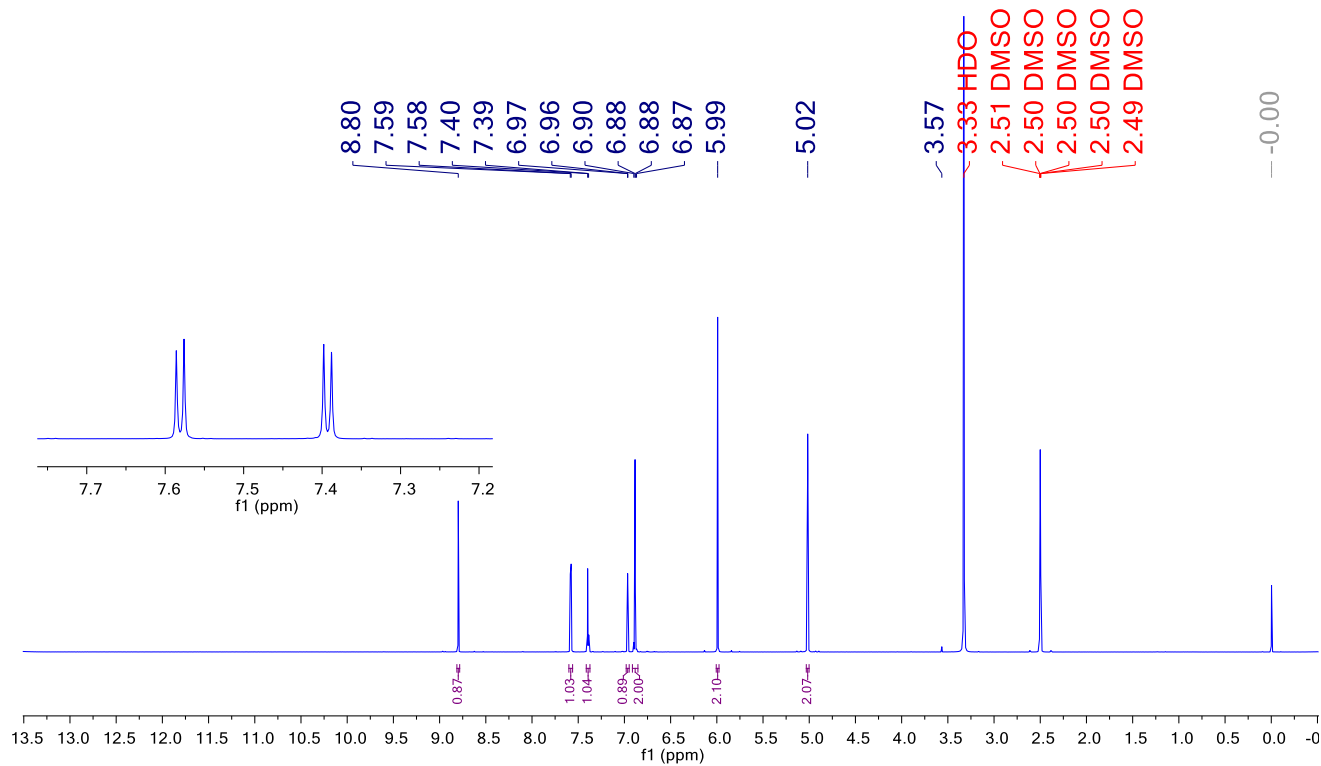



7-(Benzo[d][1,3]dioxol-5-ylmethyl)-2-nitroimidazo[1,2-a]pyrazin-8(7H)-one (26k)

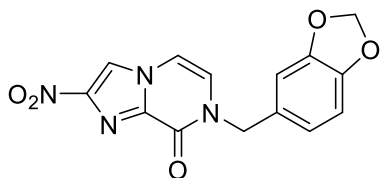

<sup>13</sup>C NMR (150 MHz, DMSO-d<sub>6</sub>)

| Parameter                  | Value                                                                                                                           |
|----------------------------|---------------------------------------------------------------------------------------------------------------------------------|
| 1 Data File Name           | Z:/ Projects/ 029_Anaerobic/ 029E_Chemistry/ LaboratoryNoteBooks/ CWA8805/ CWA8805_073/ NMR/ CWA8805_073_ppt_DCM_MeOH/ 2/ fid   |
| 2 Title                    | CWA8805_073_ppt_DCM_MeOH.2.fid                                                                                                  |
| 3 Comment                  | <sup>13</sup> C JMOD NMR of CWA8805_073_ppt_DCM_MeOH 2.2mg in 500uL DMSO-d <sub>6</sub> ; LC-NMR A_13C_JMOD DMSO C:\ \ c.ang 10 |
| 4 Origin                   | Bruker BioSpin GmbH                                                                                                             |
| 5 Owner                    | biodiversity                                                                                                                    |
| 6 Site                     |                                                                                                                                 |
| 7 Instrument               | spect                                                                                                                           |
| 8 Author                   |                                                                                                                                 |
| 9 Solvent                  | DMSO                                                                                                                            |
| 10 Temperature             | 298.0                                                                                                                           |
| 11 Pulse Sequence          | jmod                                                                                                                            |
| 12 Experiment              | JMOD                                                                                                                            |
| 13 Probe                   | 5 mm PASEI 1H/ D-13C Z-GRD Z866801/ 0003                                                                                        |
| 14 Number of Scans         | 10000                                                                                                                           |
| 15 Receiver Gain           | 2050.0                                                                                                                          |
| 16 Relaxation Delay        | 1.0000                                                                                                                          |
| 17 Pulse Width             | 14.0000                                                                                                                         |
| 18 Presaturation Frequency |                                                                                                                                 |
| 19 Acquisition Time        | 0.8739                                                                                                                          |
| 20 Acquisition Date        | 2018-01-31T22:30:00                                                                                                             |
| 21 Modification Date       | 2018-01-31T22:47:51                                                                                                             |
| 22 Class                   |                                                                                                                                 |
| 23 Spectrometer Frequency  | 150.91                                                                                                                          |
| 24 Spectral Width          | 37500.0                                                                                                                         |
| 25 Lowest Frequency        | -2227.5                                                                                                                         |
| 26 Nucleus                 | <sup>13</sup> C                                                                                                                 |
| 27 Acquired Size           | 32768                                                                                                                           |
| 28 Spectral Size           | 65536                                                                                                                           |

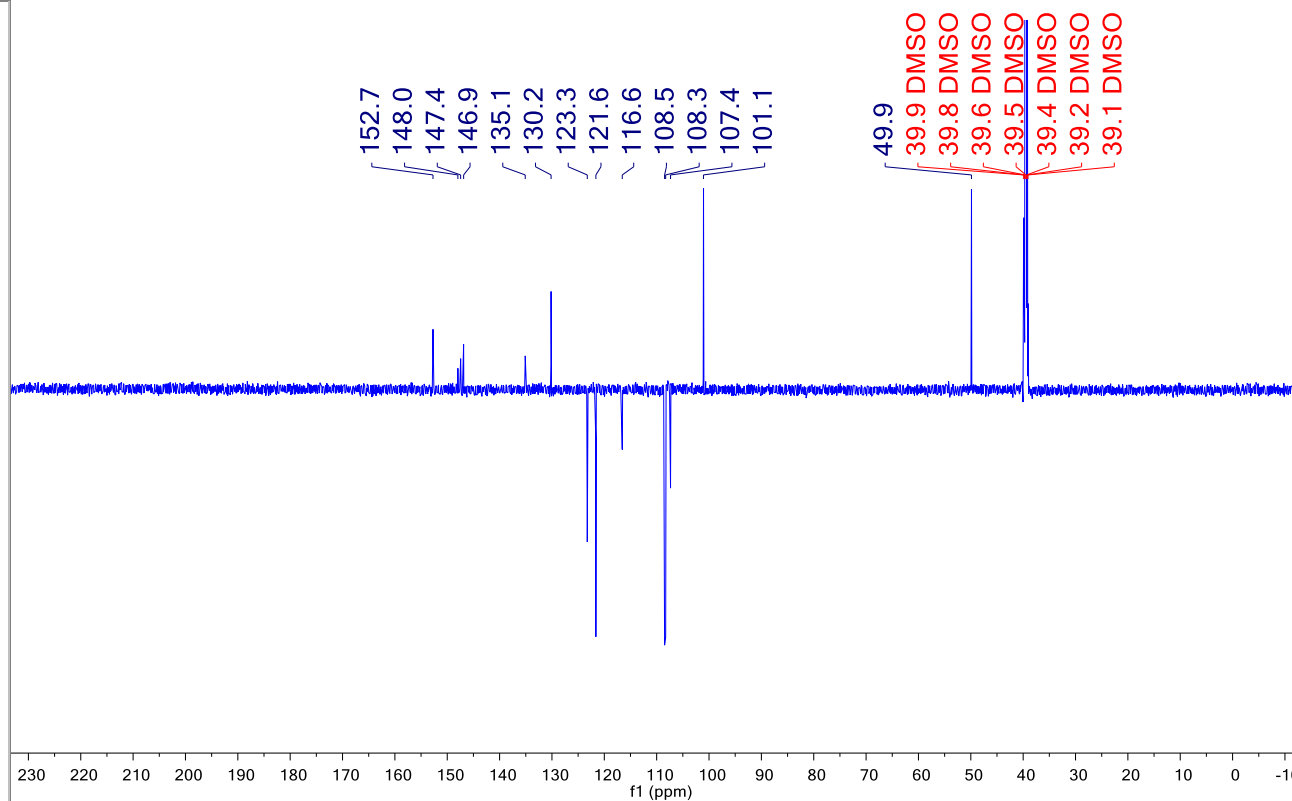

7-([1,1'-Biphenyl]-4-ylmethyl)-2-nitroimidazo[1,2-a]pyrazin-8(7H)-one (34a)

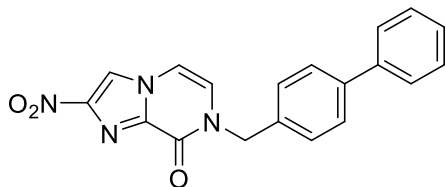

<sup>1</sup>H NMR (600 MHz, DMSO-d<sub>6</sub>)

| Parameter                  | Value                                          |
|----------------------------|------------------------------------------------|
| 1 Title                    | CWA8967_048_ppt_DCM_MeOH.1.fid                 |
| 2 Origin                   | Bruker BioSpin GmbH                            |
| 3 Owner                    | nmr                                            |
| 4 Spectrometer             | spect                                          |
| 5 Solvent                  | DMSO                                           |
| 6 Temperature              | 298.0                                          |
| 7 Pulse Sequence           | zg                                             |
| 8 Experiment               | 1D                                             |
| 9 Probe                    | Z129649_0009 (CP TCI 600S3 H&F-C/<br>N-D-05 Z) |
| 10 Number of Scans         | 32                                             |
| 11 Receiver Gain           | 59.7                                           |
| 12 Relaxation Delay        | 5.0000                                         |
| 13 Pulse Width             | 8.0000                                         |
| 14 Presaturation Frequency |                                                |
| 15 Acquisition Time        | 1.9464                                         |
| 16 Acquisition Date        | 2018-05-11T11:27:49                            |
| 17 Modification Date       | 2018-05-11T11:27:49                            |
| 18 Spectrometer Frequency  | 600.13                                         |
| 19 Spectral Width          | 8417.5                                         |
| 20 Lowest Frequency        | -1208.1                                        |
| 21 Nucleus                 | 1H                                             |
| 22 Acquired Size           | 16384                                          |
| 23 Spectral Size           | 65536                                          |

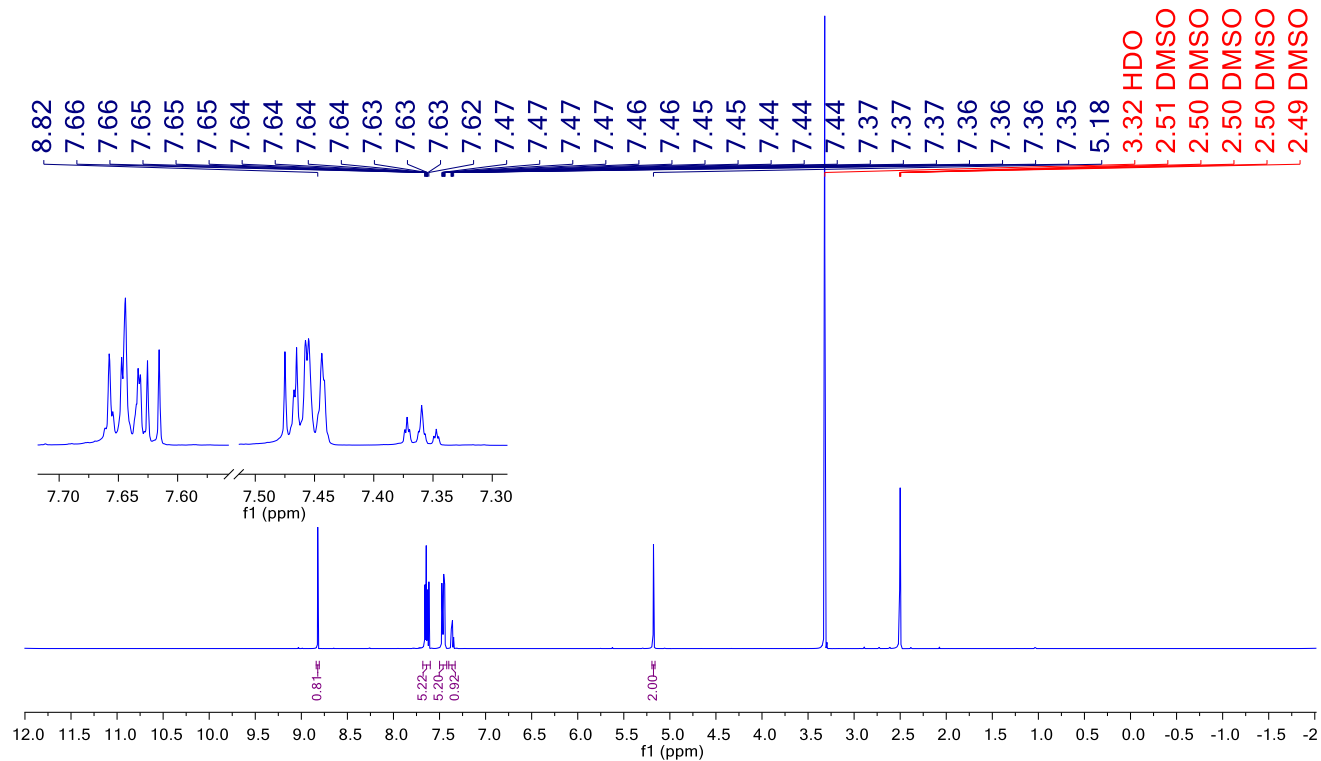

**7-([1,1'-Biphenyl]-4-ylmethyl)-2-nitroimidazo[1,2-a]pyrazin-8(7H)-one (34a)**



**<sup>13</sup>C NMR (150 MHz, DMSO-*d*<sub>6</sub>)**

| Parameter                  | Value                                          |
|----------------------------|------------------------------------------------|
| 1 Title                    | CWA8967_048_ppT_DCM_MeOH.2.fid                 |
| 2 Origin                   | Bruker BioSpin GmbH                            |
| 3 Owner                    | nmr                                            |
| 4 Spectrometer             | spect                                          |
| 5 Solvent                  | DMSO                                           |
| 6 Temperature              | 298.0                                          |
| 7 Pulse Sequence           | jmod                                           |
| 8 Experiment               | JMOD                                           |
| 9 Probe                    | Z129649_0009 (CP TCI 600S3 H&F-C/<br>N-D-05 Z) |
| 10 Number of Scans         | 6000                                           |
| 11 Receiver Gain           | 191.6                                          |
| 12 Relaxation Delay        | 1.0000                                         |
| 13 Pulse Width             | 12.0000                                        |
| 14 Presaturation Frequency |                                                |
| 15 Acquisition Time        | 0.8738                                         |
| 16 Acquisition Date        | 2018-05-11T14:54:55                            |
| 17 Modification Date       | 2018-05-11T14:54:55                            |
| 18 Spectrometer Frequency  | 150.92                                         |
| 19 Spectral Width          | 37500.0                                        |
| 20 Lowest Frequency        | -2151.2                                        |
| 21 Nucleus                 | <sup>13</sup> C                                |
| 22 Acquired Size           | 32768                                          |
| 23 Spectral Size           | 65536                                          |

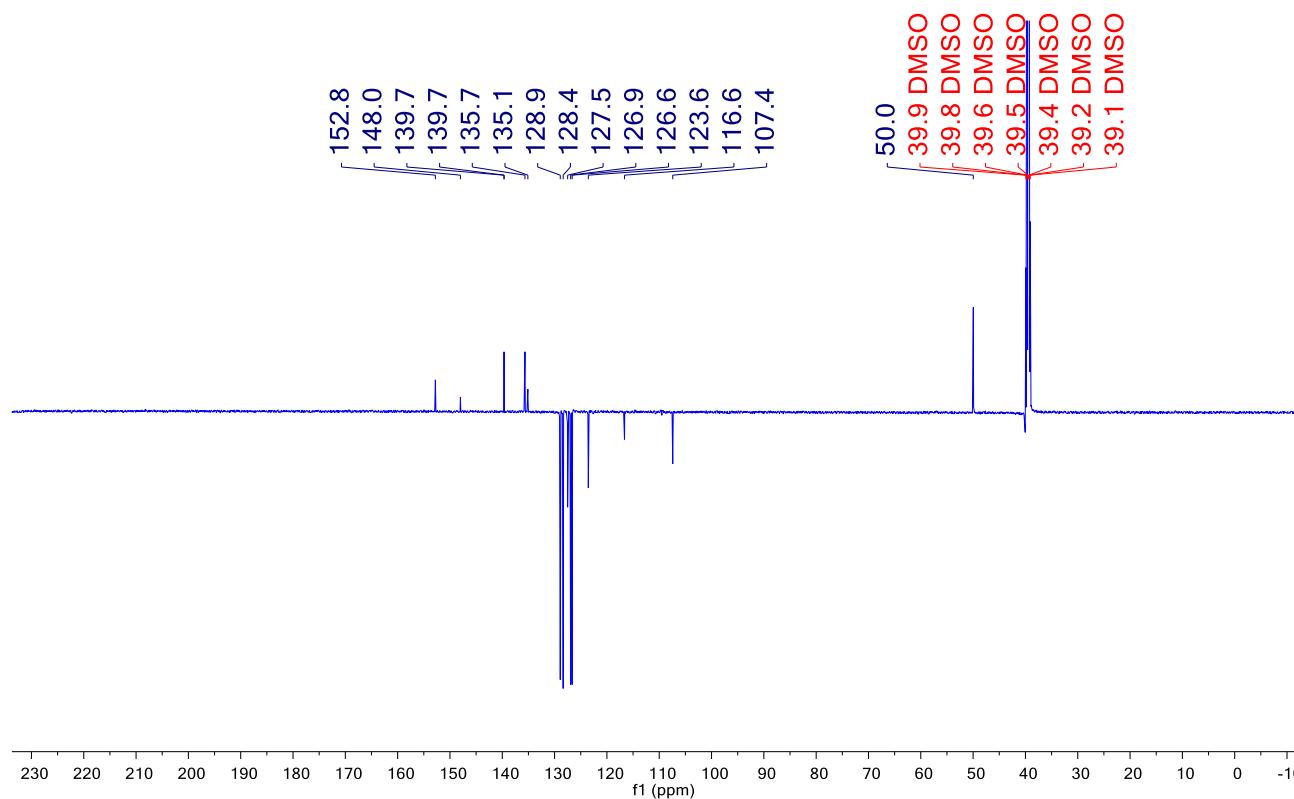

**2-Nitro-7-((4'-(trifluoromethoxy)-[1,1'-biphenyl]-4-yl)methyl)imidazo[1,2-a]pyrazin-8(7H)-one (34b)**

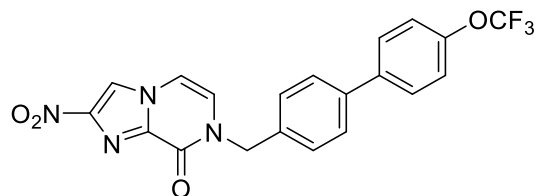

**<sup>1</sup>H NMR (600 MHz, DMSO-*d*<sub>6</sub>)**

| Parameter                  | Value                                       |
|----------------------------|---------------------------------------------|
| 1 Title                    | CWA8967_089_ppt_MeOH_acetone.1.fid          |
| 2 Origin                   | Bruker BioSpin GmbH                         |
| 3 Owner                    | nmr                                         |
| 4 Spectrometer             | spect                                       |
| 5 Solvent                  | DMSO                                        |
| 6 Temperature              | 298.0                                       |
| 7 Pulse Sequence           | zg                                          |
| 8 Experiment               | 1D                                          |
| 9 Probe                    | Z129649_0009 (CP TCI 600S3 H&F-C/ N-D-05 Z) |
| 10 Number of Scans         | 16                                          |
| 11 Receiver Gain           | 59.7                                        |
| 12 Relaxation Delay        | 5.0000                                      |
| 13 Pulse Width             | 8.0000                                      |
| 14 Presaturation Frequency |                                             |
| 15 Acquisition Time        | 1.9465                                      |
| 16 Acquisition Date        | 2018-07-27T11:20:00                         |
| 17 Modification Date       | 2018-07-28T12:13:16                         |
| 18 Spectrometer Frequency  | 600.13                                      |
| 19 Spectral Width          | 8417.5                                      |
| 20 Lowest Frequency        | -1208.1                                     |
| 21 Nucleus                 | <sup>1</sup> H                              |
| 22 Acquired Size           | 16384                                       |
| 23 Spectral Size           | 65536                                       |

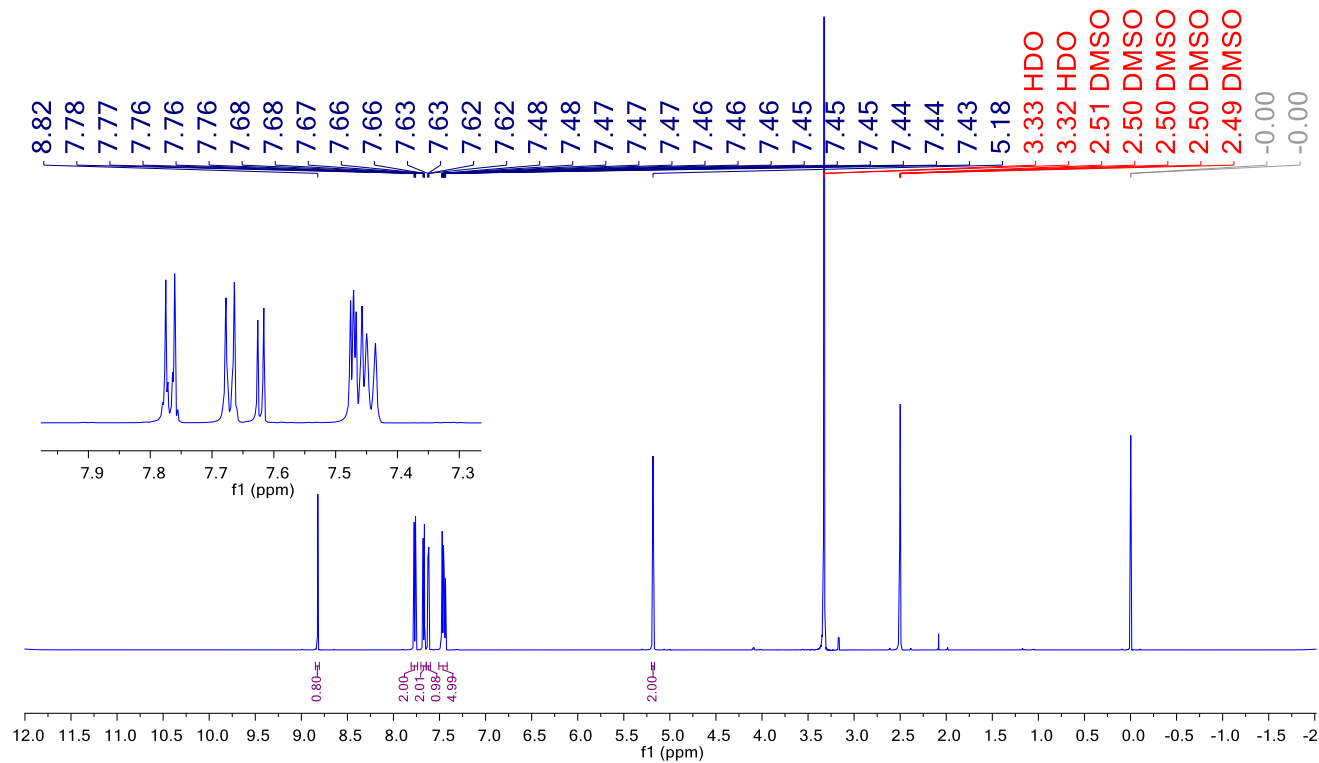

## 2-Nitro-7-((4'-(trifluoromethoxy)-[1,1'-biphenyl]-4-yl)methyl)imidazo[1,2-a]pyrazin-8(7H)-one (34b)



### <sup>13</sup>C NMR (150 MHz, DMSO-*d*<sub>6</sub>)

| Parameter                  | Value                                       |
|----------------------------|---------------------------------------------|
| 1 Title                    | CWA8967_089_ppt_MeOH_acetone.2.fid          |
| 2 Origin                   | Bruker BioSpin GmbH                         |
| 3 Owner                    | nmr                                         |
| 4 Spectrometer             | spect                                       |
| 5 Solvent                  | DMSO                                        |
| 6 Temperature              | 298.0                                       |
| 7 Pulse                    | jmod                                        |
| Sequence                   |                                             |
| 8 Experiment               | JMOD                                        |
| 9 Probe                    | Z129649_0009 (CP TCI 600S3 H&F-C/ N-D-05 Z) |
| 10 Number of Scans         | 10240                                       |
| 11 Receiver Gain           | 191.6                                       |
| 12 Relaxation Delay        | 1.0000                                      |
| 13 Pulse Width             | 12.0000                                     |
| 14 Presaturation Frequency |                                             |
| 15 Acquisition Time        | 0.8738                                      |
| 16 Acquisition Date        | 2018-07-28T17:41:24                         |
| 17 Modification Date       | 2018-07-28T17:41:25                         |
| 18 Spectrometer Frequency  | 150.92                                      |
| 19 Spectral Width          | 37500.0                                     |
| 20 Lowest Frequency        | -2151.2                                     |
| 21 Nucleus                 | <sup>13</sup> C                             |
| 22 Acquired Size           | 32768                                       |
| 23 Spectral Size           | 65536                                       |

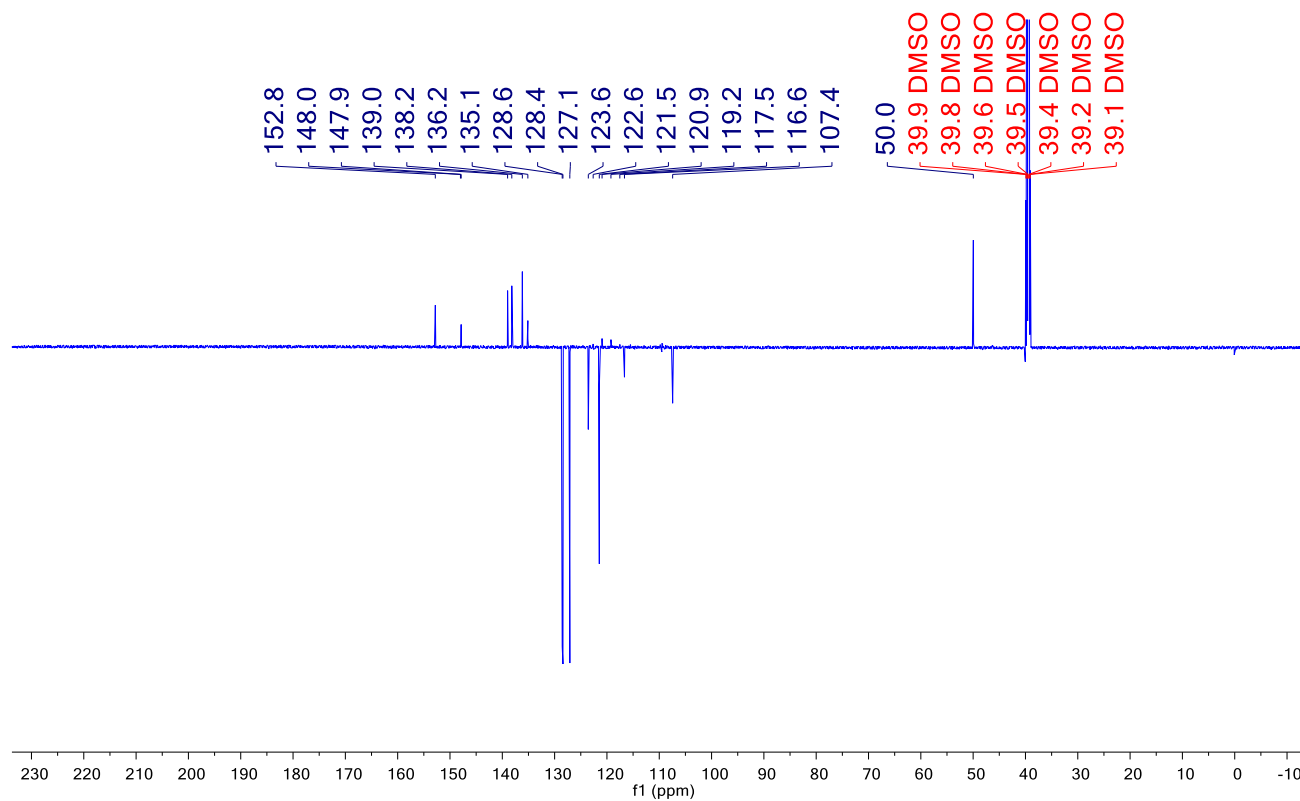

7-((4'-Methyl-[1,1'-biphenyl]-4-yl)methyl)-2-nitroimidazo[1,2-a]pyrazin-8(7H)-one (34c)

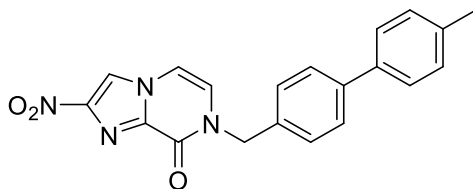

<sup>1</sup>H NMR (600 MHz, DMSO-d<sub>6</sub>)

| Parameter                  | Value                                          |
|----------------------------|------------------------------------------------|
| 1 Title                    | CWA9117_033_ppt_DCM_MeOH.1.fid                 |
| 2 Origin                   | Bruker BioSpin GmbH                            |
| 3 Owner                    | nmr                                            |
| 4 Spectrometer             | spect                                          |
| 5 Solvent                  | DMSO                                           |
| 6 Temperature              | 298.0                                          |
| 7 Pulse Sequence           | zg                                             |
| 8 Experiment               | 1D                                             |
| 9 Probe                    | Z129649_0009 (CP TCI 600S3 H&F-C/<br>N-D-05 Z) |
| 10 Number of Scans         | 16                                             |
| 11 Receiver Gain           | 59.7                                           |
| 12 Relaxation Delay        | 5.0000                                         |
| 13 Pulse Width             | 8.0000                                         |
| 14 Presaturation Frequency |                                                |
| 15 Acquisition Time        | 1.9464                                         |
| 16 Acquisition Date        | 2018-09-07T15:10:38                            |
| 17 Modification Date       | 2018-09-07T15:10:38                            |
| 18 Spectrometer Frequency  | 600.13                                         |
| 19 Spectral Width          | 8417.5                                         |
| 20 Lowest Frequency        | -1208.1                                        |
| 21 Nucleus                 | 1H                                             |
| 22 Acquired Size           | 16384                                          |
| 23 Spectral Size           | 65536                                          |

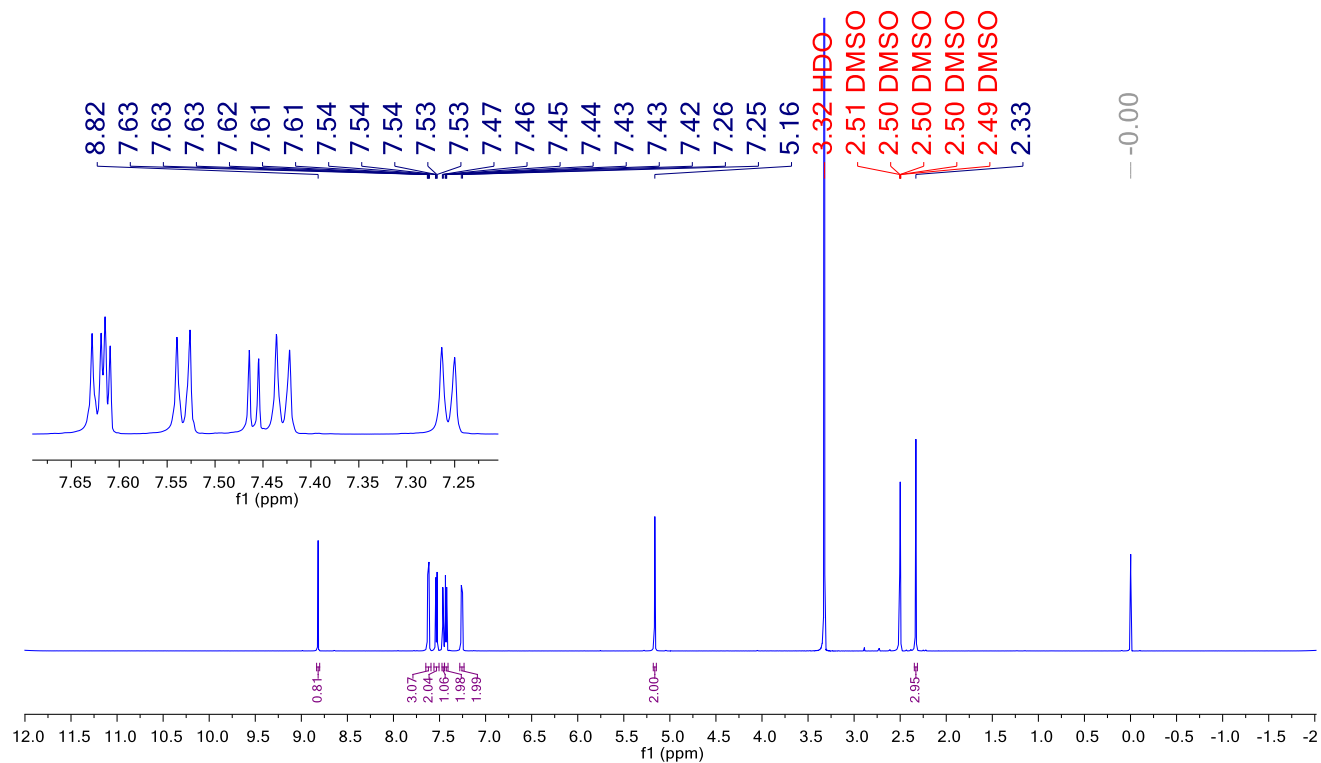

**7-((4'-Methyl-[1,1'-biphenyl]-4-yl)methyl)-2-nitroimidazo[1,2-a]pyrazin-8(7H)-one (34c)**



**<sup>13</sup>C NMR (150 MHz, DMSO-*d*<sub>6</sub>)**

| Parameter                  | Value                                          |
|----------------------------|------------------------------------------------|
| 1 Title                    | CWA9117_033_ppt_DCM_MeOH.2.fid                 |
| 2 Origin                   | Bruker BioSpin GmbH                            |
| 3 Owner                    | nmr                                            |
| 4 Spectrometer             | spect                                          |
| 5 Solvent                  | DMSO                                           |
| 6 Temperature              | 298.0                                          |
| 7 Pulse Sequence           | jmod                                           |
| 8 Experiment               | JMOD                                           |
| 9 Probe                    | Z129649_0009 (CP TCI 600S3 H&F-C/<br>N-D-05 Z) |
| 10 Number of Scans         | 5120                                           |
| 11 Receiver Gain           | 191.6                                          |
| 12 Relaxation Delay        | 1.0000                                         |
| 13 Pulse Width             | 12.0000                                        |
| 14 Presaturation Frequency |                                                |
| 15 Acquisition Time        | 0.8738                                         |
| 16 Acquisition Date        | 2018-09-07T19:54:41                            |
| 17 Modification Date       | 2018-09-07T19:54:41                            |
| 18 Spectrometer Frequency  | 150.92                                         |
| 19 Spectral Width          | 37500.0                                        |
| 20 Lowest Frequency        | -2151.2                                        |
| 21 Nucleus                 | <sup>13</sup> C                                |
| 22 Acquired Size           | 32768                                          |
| 23 Spectral Size           | 65536                                          |

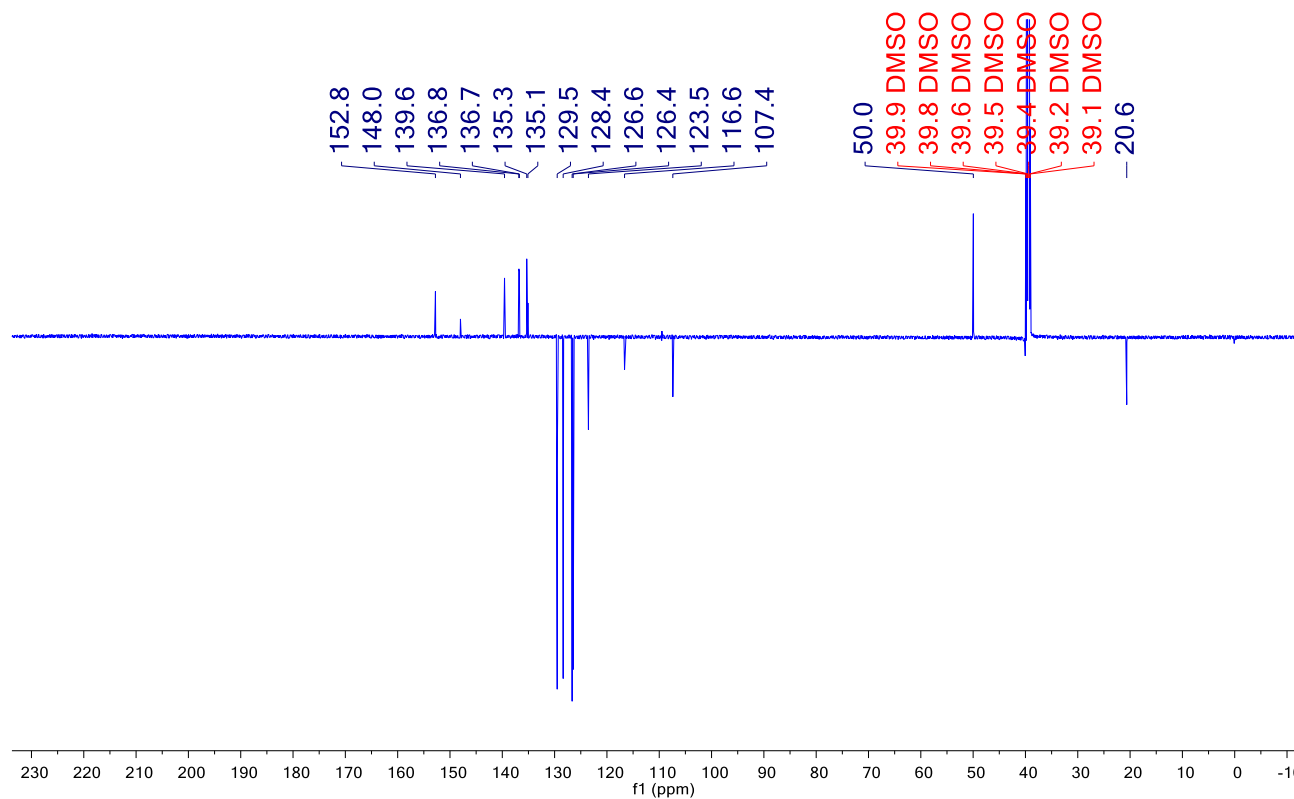

**2-Nitro-7-((3'-(trifluoromethoxy)-[1,1'-biphenyl]-4-yl)methyl)imidazo[1,2-a]pyrazin-8(7H)-one (34d)**

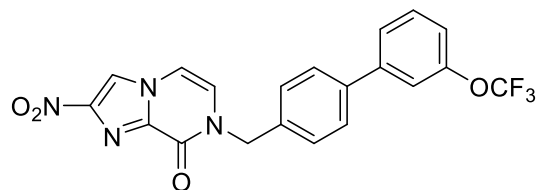

**<sup>1</sup>H NMR (600 MHz, DMSO-*d*<sub>6</sub>)**

| Parameter                  | Value                                          |
|----------------------------|------------------------------------------------|
| 1 Title                    | CWA8967_106_ppt_MeOH_DCM.1.fid                 |
| 2 Origin                   | Bruker BioSpin GmbH                            |
| 3 Owner                    | nmr                                            |
| 4 Spectrometer             | spect                                          |
| 5 Solvent                  | DMSO                                           |
| 6 Temperature              | 298.0                                          |
| 7 Pulse Sequence           | zg                                             |
| 8 Experiment               | 1D                                             |
| 9 Probe                    | Z129649_0009 (CP TCI 600S3 H&F-C/<br>N-D-05 Z) |
| 10 Number of Scans         | 16                                             |
| 11 Receiver Gain           | 109.3                                          |
| 12 Relaxation Delay        | 5.0000                                         |
| 13 Pulse Width             | 8.0000                                         |
| 14 Presaturation Frequency |                                                |
| 15 Acquisition Time        | 1.9464                                         |
| 16 Acquisition Date        | 2018-08-16T18:02:27                            |
| 17 Modification Date       | 2018-08-16T18:02:27                            |
| 18 Spectrometer Frequency  | 600.13                                         |
| 19 Spectral Width          | 8417.5                                         |
| 20 Lowest Frequency        | -1208.1                                        |
| 21 Nucleus                 | <sup>1</sup> H                                 |
| 22 Acquired Size           | 16384                                          |
| 23 Spectral Size           | 65536                                          |

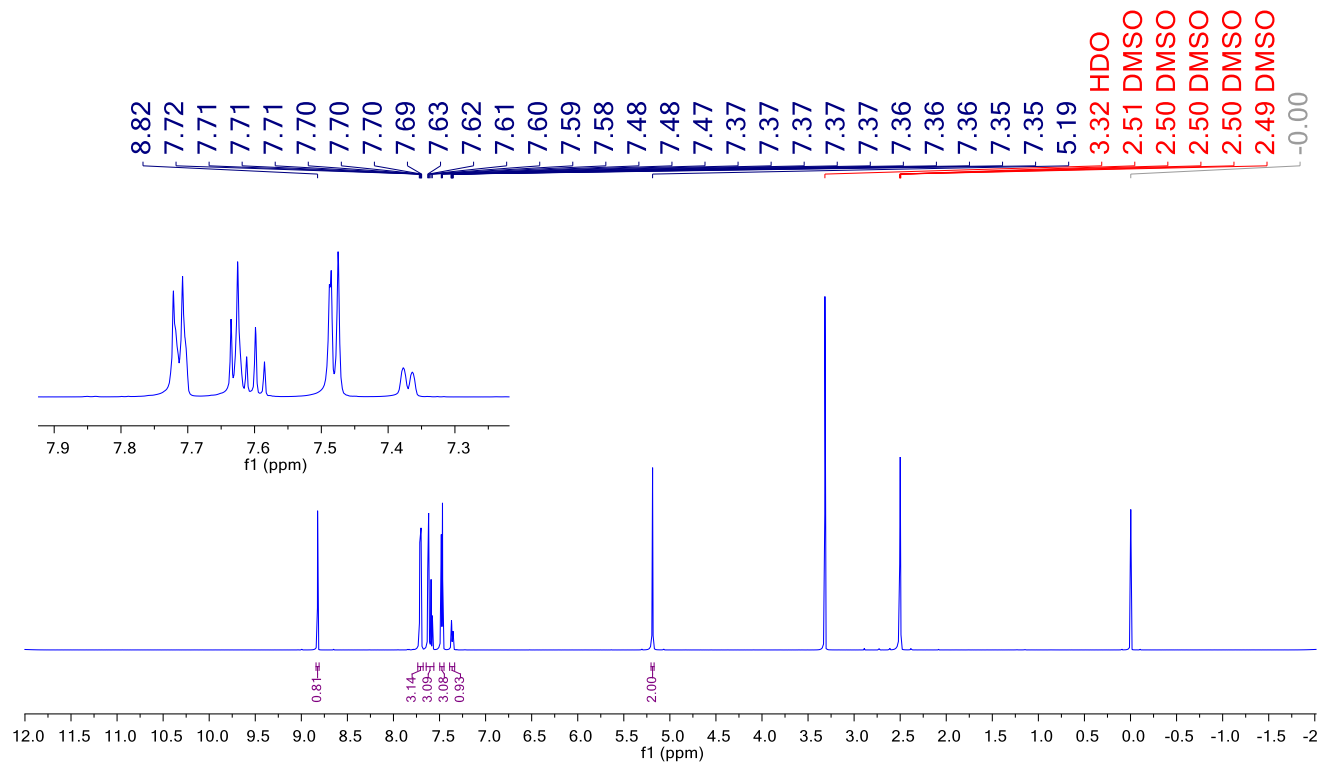



## 2-Nitro-7-((3'-(trifluoromethoxy)-[1,1'-biphenyl]-4-yl)methyl)imidazo[1,2-a]pyrazin-8(7H)-one (34d)

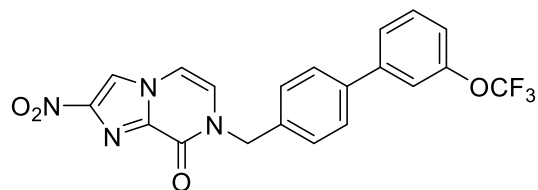

### <sup>13</sup>C NMR (150 MHz, DMSO-*d*<sub>6</sub>)

| Parameter                  | Value                                          |
|----------------------------|------------------------------------------------|
| 1 Title                    | CWA8967_106_ppt_MeOH_DCM.2.fid                 |
| 2 Origin                   | Bruker BioSpin GmbH                            |
| 3 Owner                    | nmr                                            |
| 4 Spectrometer             | spect                                          |
| 5 Solvent                  | DMSO                                           |
| 6 Temperature              | 298.0                                          |
| 7 Pulse Sequence           | jmod                                           |
| 8 Experiment               | JMOD                                           |
| 9 Probe                    | Z129649_0009 (CP TCI 600S3 H&F-C/<br>N-D-05 Z) |
| 10 Number of Scans         | 9000                                           |
| 11 Receiver Gain           | 191.6                                          |
| 12 Relaxation Delay        | 1.0000                                         |
| 13 Pulse Width             | 12.0000                                        |
| 14 Presaturation Frequency |                                                |
| 15 Acquisition Time        | 0.8738                                         |
| 16 Acquisition Date        | 2018-08-16T22:51:47                            |
| 17 Modification Date       | 2018-08-16T22:51:47                            |
| 18 Spectrometer Frequency  | 150.92                                         |
| 19 Spectral Width          | 37500.0                                        |
| 20 Lowest Frequency        | -2151.2                                        |
| 21 Nucleus                 | <sup>13</sup> C                                |
| 22 Acquired Size           | 32768                                          |
| 23 Spectral Size           | 65536                                          |

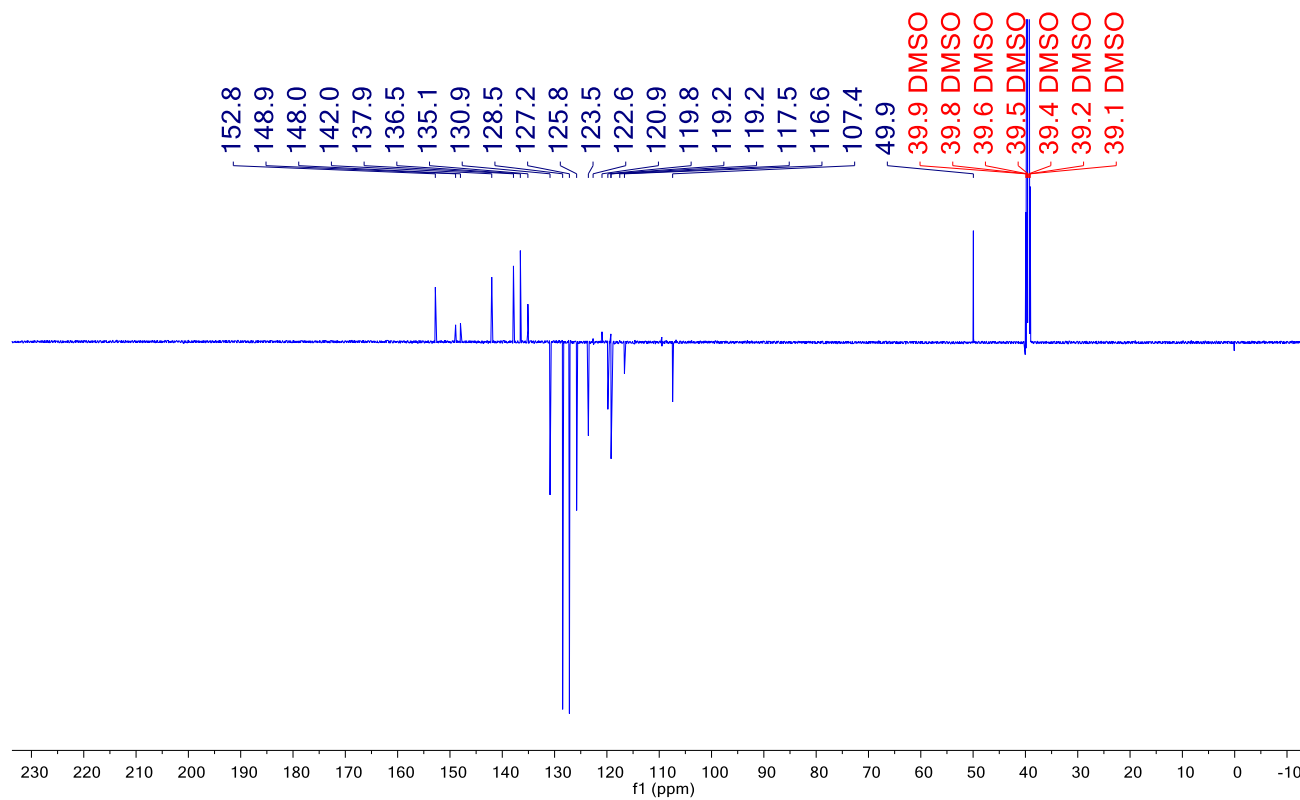

## 2-Nitro-7-(4-(pyridin-3-yl)benzyl)imidazo[1,2-a]pyrazin-8(7H)-one (34e)

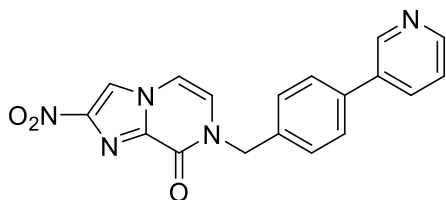

### <sup>1</sup>H NMR (600 MHz, DMSO-d<sub>6</sub>)

| Parameter                  | Value                                          |
|----------------------------|------------------------------------------------|
| 1 Title                    | CWA9171_097_ppt_DCM_MeOH.1.fid                 |
| 2 Origin                   | Bruker BioSpin GmbH                            |
| 3 Owner                    | nmr                                            |
| 4 Spectrometer             | spect                                          |
| 5 Solvent                  | DMSO                                           |
| 6 Temperature              | 298.0                                          |
| 7 Pulse Sequence           | zg                                             |
| 8 Experiment               | 1D                                             |
| 9 Probe                    | Z129649_0009 (CP TCI 600S3 H&F-C/<br>N-D-05 Z) |
| 10 Number of Scans         | 16                                             |
| 11 Receiver Gain           | 59.7                                           |
| 12 Relaxation Delay        | 5.0000                                         |
| 13 Pulse Width             | 8.0000                                         |
| 14 Presaturation Frequency |                                                |
| 15 Acquisition Time        | 1.9464                                         |
| 16 Acquisition Date        | 2019-04-24T17:07:32                            |
| 17 Modification Date       | 2019-04-24T17:07:32                            |
| 18 Spectrometer Frequency  | 600.13                                         |
| 19 Spectral Width          | 8417.5                                         |
| 20 Lowest Frequency        | -1208.1                                        |
| 21 Nucleus                 | 1H                                             |
| 22 Acquired Size           | 16384                                          |
| 23 Spectral Size           | 65536                                          |

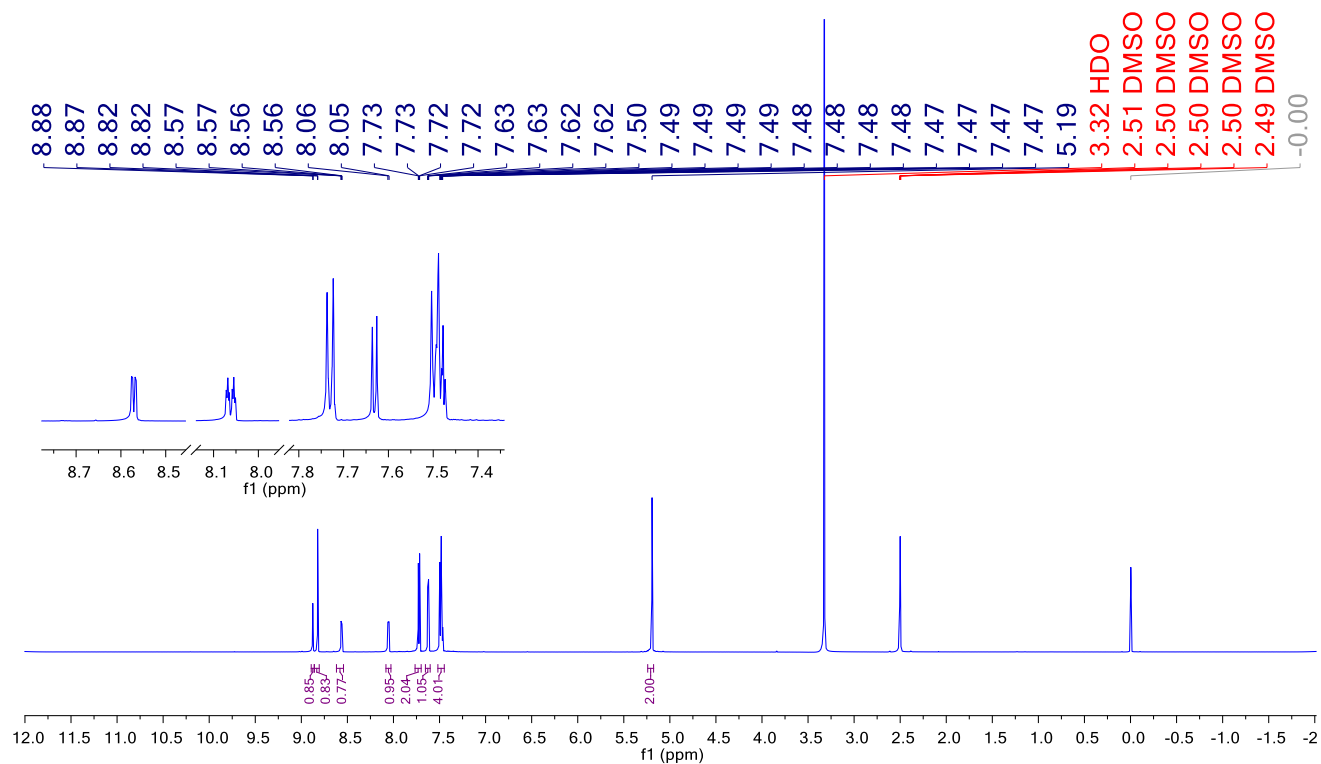

## 2-Nitro-7-(4-(pyridin-3-yl)benzyl)imidazo[1,2-a]pyrazin-8(7H)-one (34e)



### <sup>13</sup>C NMR (150 MHz, DMSO-d<sub>6</sub>)

| Parameter                  | Value                                          |
|----------------------------|------------------------------------------------|
| 1 Title                    | CWA9171_097_ppt_DCM_MeOH.2.fid                 |
| 2 Origin                   | Bruker BioSpin GmbH                            |
| 3 Owner                    | nmr                                            |
| 4 Spectrometer             | spect                                          |
| 5 Solvent                  | DMSO                                           |
| 6 Temperature              | 298.0                                          |
| 7 Pulse Sequence           | jmod                                           |
| 8 Experiment               | JMOD                                           |
| 9 Probe                    | Z129649_0009 (CP TCI 600S3 H&F-C/<br>N-D-05 Z) |
| 10 Number of Scans         | 7500                                           |
| 11 Receiver Gain           | 191.6                                          |
| 12 Relaxation Delay        | 1.0000                                         |
| 13 Pulse Width             | 12.0000                                        |
| 14 Presaturation Frequency |                                                |
| 15 Acquisition Time        | 0.8738                                         |
| 16 Acquisition Date        | 2019-04-24T21:08:24                            |
| 17 Modification Date       | 2019-04-24T21:08:24                            |
| 18 Spectrometer Frequency  | 150.92                                         |
| 19 Spectral Width          | 37500.0                                        |
| 20 Lowest Frequency        | -2151.2                                        |
| 21 Nucleus                 | <sup>13</sup> C                                |
| 22 Acquired Size           | 32768                                          |
| 23 Spectral Size           | 65536                                          |

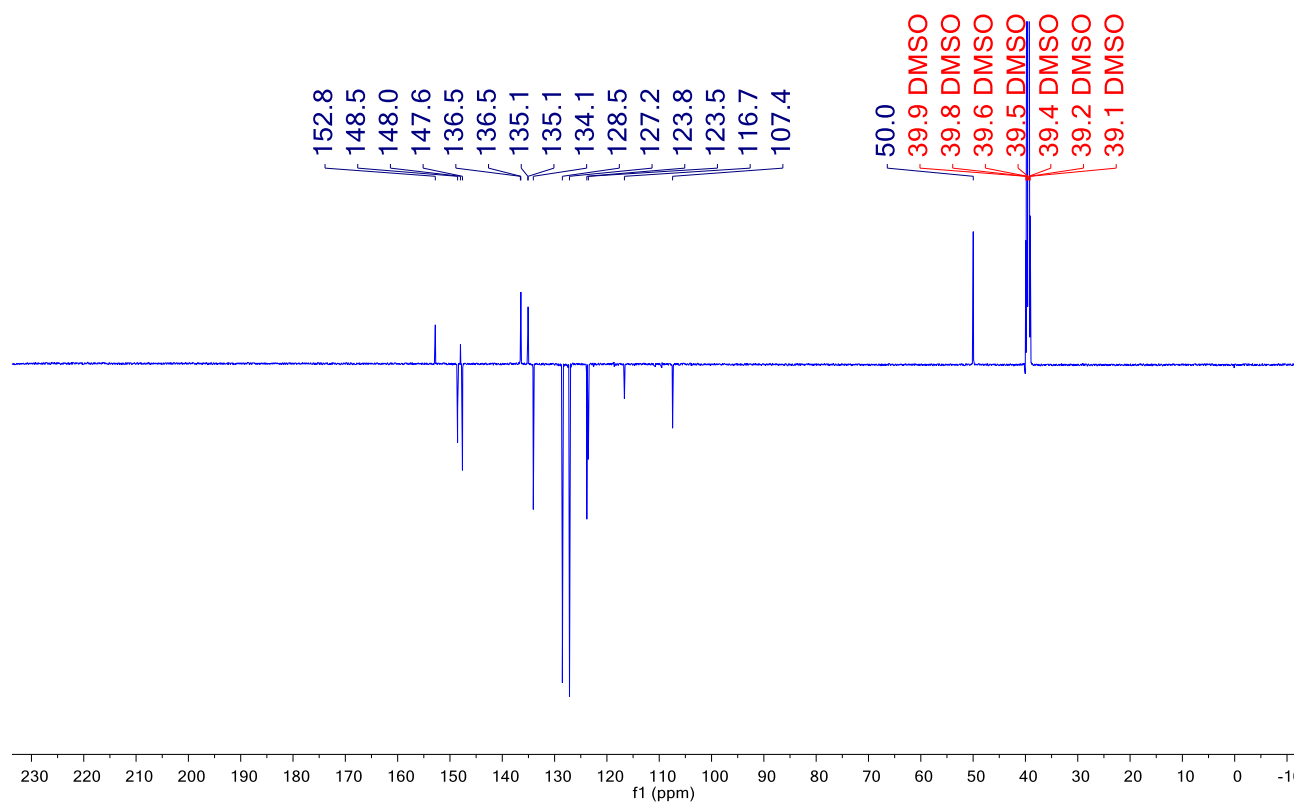

**2-Nitro-7-((6-phenylpyridin-3-yl)methyl)imidazo[1,2-a]pyrazin-8(7H)-one (34f)**

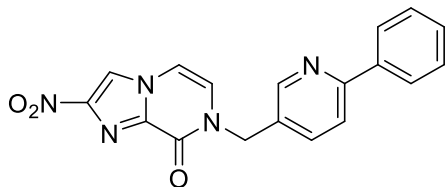

**<sup>1</sup>H NMR (600 MHz, DMSO-d<sub>6</sub>)**

| Parameter                  | Value                                          |
|----------------------------|------------------------------------------------|
| 1 Title                    | CWA9117_042_ppt_DCM_MeOH.1.fid                 |
| 2 Origin                   | Bruker BioSpin GmbH                            |
| 3 Owner                    | nmr                                            |
| 4 Spectrometer             | spect                                          |
| 5 Solvent                  | DMSO                                           |
| 6 Temperature              | 298.0                                          |
| 7 Pulse Sequence           | zg                                             |
| 8 Experiment               | 1D                                             |
| 9 Probe                    | Z129649_0009 (CP TCI 600S3 H&F-C/<br>N-D-05 Z) |
| 10 Number of Scans         | 16                                             |
| 11 Receiver Gain           | 59.7                                           |
| 12 Relaxation Delay        | 5.0000                                         |
| 13 Pulse Width             | 8.0000                                         |
| 14 Presaturation Frequency |                                                |
| 15 Acquisition Time        | 1.9464                                         |
| 16 Acquisition Date        | 2018-09-10T17:16:22                            |
| 17 Modification Date       | 2018-09-10T17:16:22                            |
| 18 Spectrometer Frequency  | 600.13                                         |
| 19 Spectral Width          | 8417.5                                         |
| 20 Lowest Frequency        | -1208.1                                        |
| 21 Nucleus                 | <sup>1</sup> H                                 |
| 22 Acquired Size           | 16384                                          |
| 23 Spectral Size           | 65536                                          |

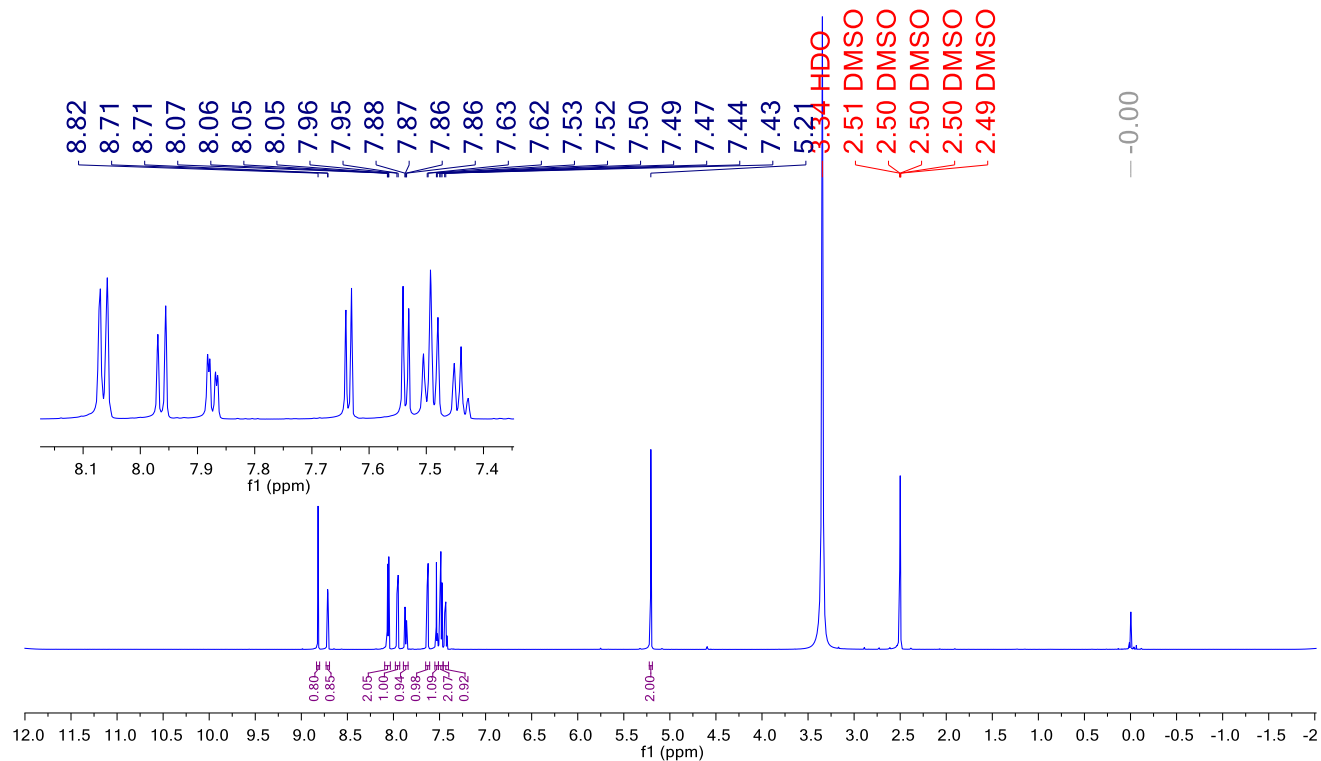

## 2-Nitro-7-((6-phenylpyridin-3-yl)methyl)imidazo[1,2-a]pyrazin-8(7H)-one (34f)



### <sup>13</sup>C NMR (150 MHz, DMSO-*d*<sub>6</sub>)

| Parameter                  | Value                                          |
|----------------------------|------------------------------------------------|
| 1 Title                    | CWA9117_042_ppt_DCM_MeOH.2.fid                 |
| 2 Origin                   | Bruker BioSpin GmbH                            |
| 3 Owner                    | nmr                                            |
| 4 Spectrometer             | spect                                          |
| 5 Solvent                  | DMSO                                           |
| 6 Temperature              | 298.0                                          |
| 7 Pulse Sequence           | jmod                                           |
| 8 Experiment               | JMOD                                           |
| 9 Probe                    | Z129649_0009 (CP TCI 600S3 H&F-C/<br>N-D-05 Z) |
| 10 Number of Scans         | 6500                                           |
| 11 Receiver Gain           | 191.6                                          |
| 12 Relaxation Delay        | 1.0000                                         |
| 13 Pulse Width             | 12.0000                                        |
| 14 Presaturation Frequency |                                                |
| 15 Acquisition Time        | 0.8738                                         |
| 16 Acquisition Date        | 2018-09-10T21:01:32                            |
| 17 Modification Date       | 2018-09-10T21:01:32                            |
| 18 Spectrometer Frequency  | 150.92                                         |
| 19 Spectral Width          | 37500.0                                        |
| 20 Lowest Frequency        | -2151.2                                        |
| 21 Nucleus                 | <sup>13</sup> C                                |
| 22 Acquired Size           | 32768                                          |
| 23 Spectral Size           | 65536                                          |

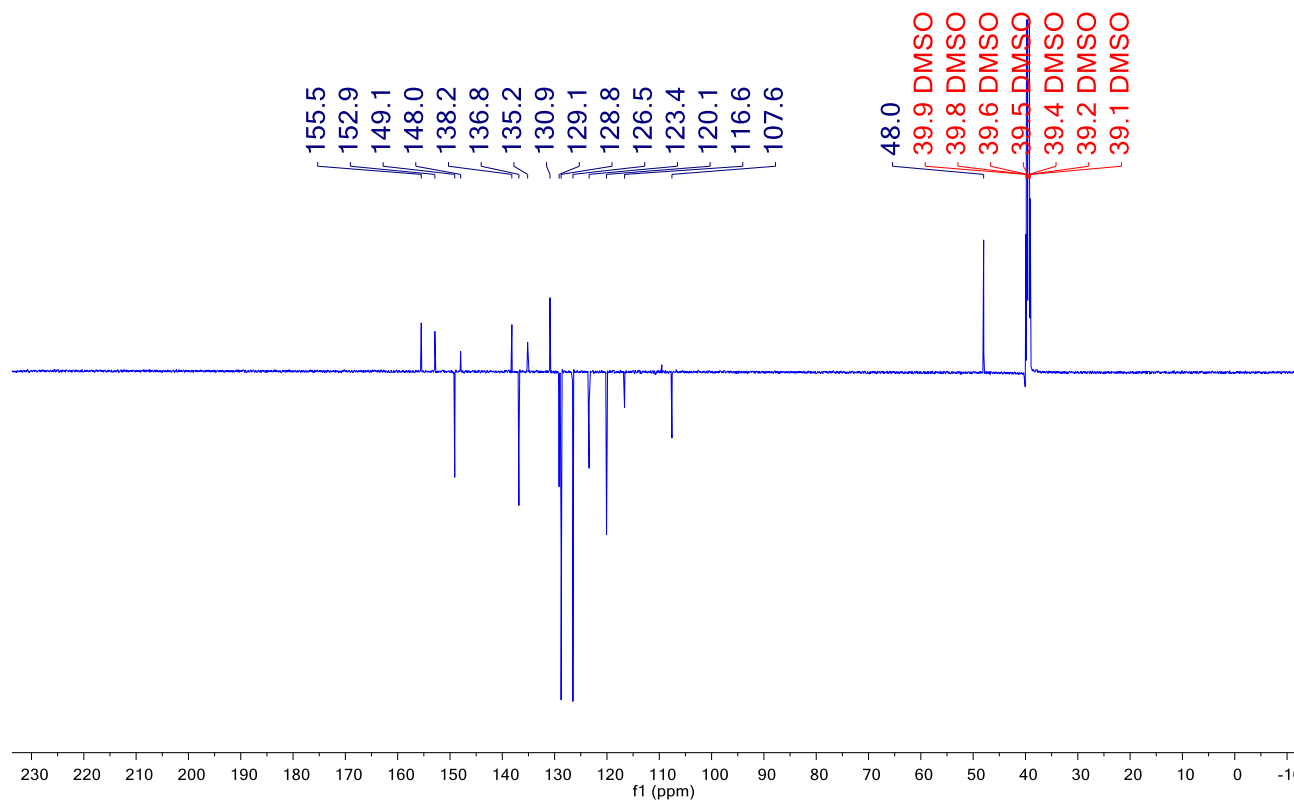

**2-Nitro-7-((6-(4-(trifluoromethoxy)phenyl)pyridin-3-yl)methyl)imidazo[1,2-a]pyrazin-8(7H)-one (34g)**

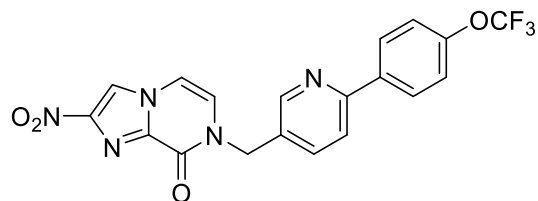

**<sup>1</sup>H NMR (600 MHz, DMSO-d<sub>6</sub>)**

| Parameter                  | Value                                          |
|----------------------------|------------------------------------------------|
| 1 Title                    | CWA9117_058_ppt_DCM_MeOH.1.fid                 |
| 2 Origin                   | Bruker BioSpin GmbH                            |
| 3 Owner                    | nmr                                            |
| 4 Spectrometer             | spect                                          |
| 5 Solvent                  | DMSO                                           |
| 6 Temperature              | 298.0                                          |
| 7 Pulse Sequence           | zg                                             |
| 8 Experiment               | 1D                                             |
| 9 Probe                    | Z129649_0009 (CP TCI 600S3 H&F-C/<br>N-D-05 Z) |
| 10 Number of Scans         | 16                                             |
| 11 Receiver Gain           | 155.2                                          |
| 12 Relaxation Delay        | 5.0000                                         |
| 13 Pulse Width             | 8.0000                                         |
| 14 Presaturation Frequency |                                                |
| 15 Acquisition Time        | 1.9464                                         |
| 16 Acquisition Date        | 2018-09-12T13:08:02                            |
| 17 Modification Date       | 2018-09-12T13:08:02                            |
| 18 Spectrometer Frequency  | 600.13                                         |
| 19 Spectral Width          | 8417.5                                         |
| 20 Lowest Frequency        | -1208.1                                        |
| 21 Nucleus                 | <sup>1</sup> H                                 |
| 22 Acquired Size           | 16384                                          |
| 23 Spectral Size           | 65536                                          |

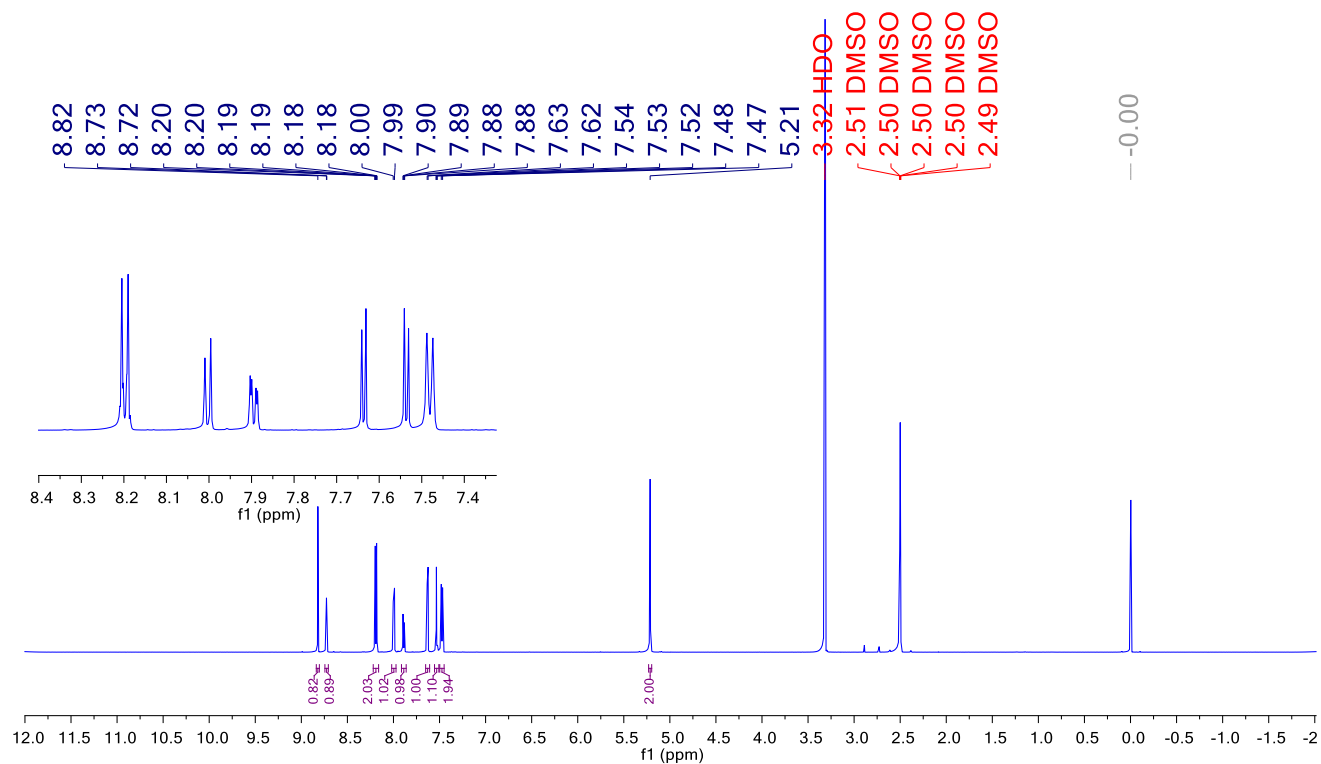

## 2-Nitro-7-((6-(4-(trifluoromethoxy)phenyl)pyridin-3-yl)methyl)imidazo[1,2-a]pyrazin-8(7H)-one (34g)



### <sup>13</sup>C NMR (150 MHz, DMSO-*d*<sub>6</sub>)

| Parameter                  | Value                                          |
|----------------------------|------------------------------------------------|
| 1 Title                    | CWA9117_058_ppt_DCM_MeOH.2.fid                 |
| 2 Origin                   | Bruker BioSpin GmbH                            |
| 3 Owner                    | nmr                                            |
| 4 Spectrometer             | spect                                          |
| 5 Solvent                  | DMSO                                           |
| 6 Temperature              | 298.0                                          |
| 7 Pulse Sequence           | jmod                                           |
| 8 Experiment               | JMOD                                           |
| 9 Probe                    | Z129649_0009 (CP TCI 600S3 H&F-C/<br>N-D-05 Z) |
| 10 Number of Scans         | 6500                                           |
| 11 Receiver Gain           | 191.6                                          |
| 12 Relaxation Delay        | 1.0000                                         |
| 13 Pulse Width             | 12.0000                                        |
| 14 Presaturation Frequency |                                                |
| 15 Acquisition Time        | 0.8738                                         |
| 16 Acquisition Date        | 2018-09-14T20:27:30                            |
| 17 Modification Date       | 2018-09-14T20:27:30                            |
| 18 Spectrometer Frequency  | 150.92                                         |
| 19 Spectral Width          | 37500.0                                        |
| 20 Lowest Frequency        | -2151.2                                        |
| 21 Nucleus                 | <sup>13</sup> C                                |
| 22 Acquired Size           | 32768                                          |
| 23 Spectral Size           | 65536                                          |

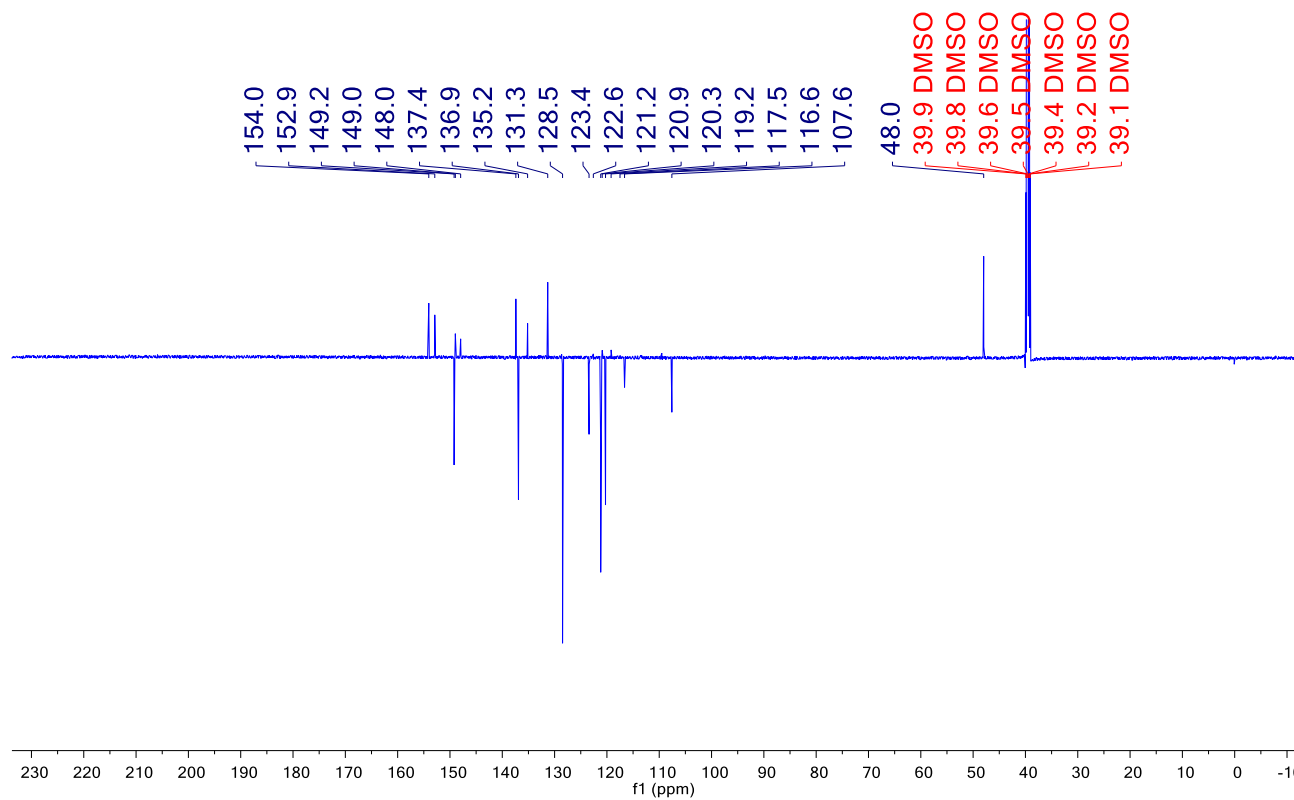

**2-Nitro-7-((6-(*p*-tolyl)pyridin-3-yl)methyl)imidazo[1,2-*a*]pyrazin-8(7*H*)-one (34h)**

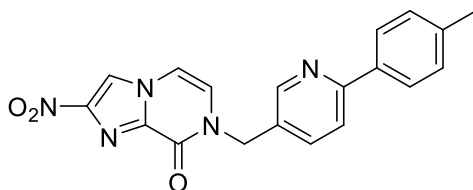

**<sup>1</sup>H NMR (600 MHz, DMSO-*d*<sub>6</sub>)**

| Parameter                  | Value                                          |
|----------------------------|------------------------------------------------|
| 1 Title                    | CWA9117_023_ppt_MeOH_DCM.1.fid                 |
| 2 Origin                   | Bruker BioSpin GmbH                            |
| 3 Owner                    | nmr                                            |
| 4 Spectrometer             | spect                                          |
| 5 Solvent                  | DMSO                                           |
| 6 Temperature              | 298.0                                          |
| 7 Pulse Sequence           | zg                                             |
| 8 Experiment               | 1D                                             |
| 9 Probe                    | Z129649_0009 (CP TCI 600S3 H&F-C/<br>N-D-05 Z) |
| 10 Number of Scans         | 16                                             |
| 11 Receiver Gain           | 155.2                                          |
| 12 Relaxation Delay        | 5.0000                                         |
| 13 Pulse Width             | 8.0000                                         |
| 14 Presaturation Frequency |                                                |
| 15 Acquisition Time        | 1.9464                                         |
| 16 Acquisition Date        | 2018-09-03T11:12:58                            |
| 17 Modification Date       | 2018-09-03T11:12:58                            |
| 18 Spectrometer Frequency  | 600.13                                         |
| 19 Spectral Width          | 8417.5                                         |
| 20 Lowest Frequency        | -1208.1                                        |
| 21 Nucleus                 | <sup>1</sup> H                                 |
| 22 Acquired Size           | 16384                                          |
| 23 Spectral Size           | 65536                                          |

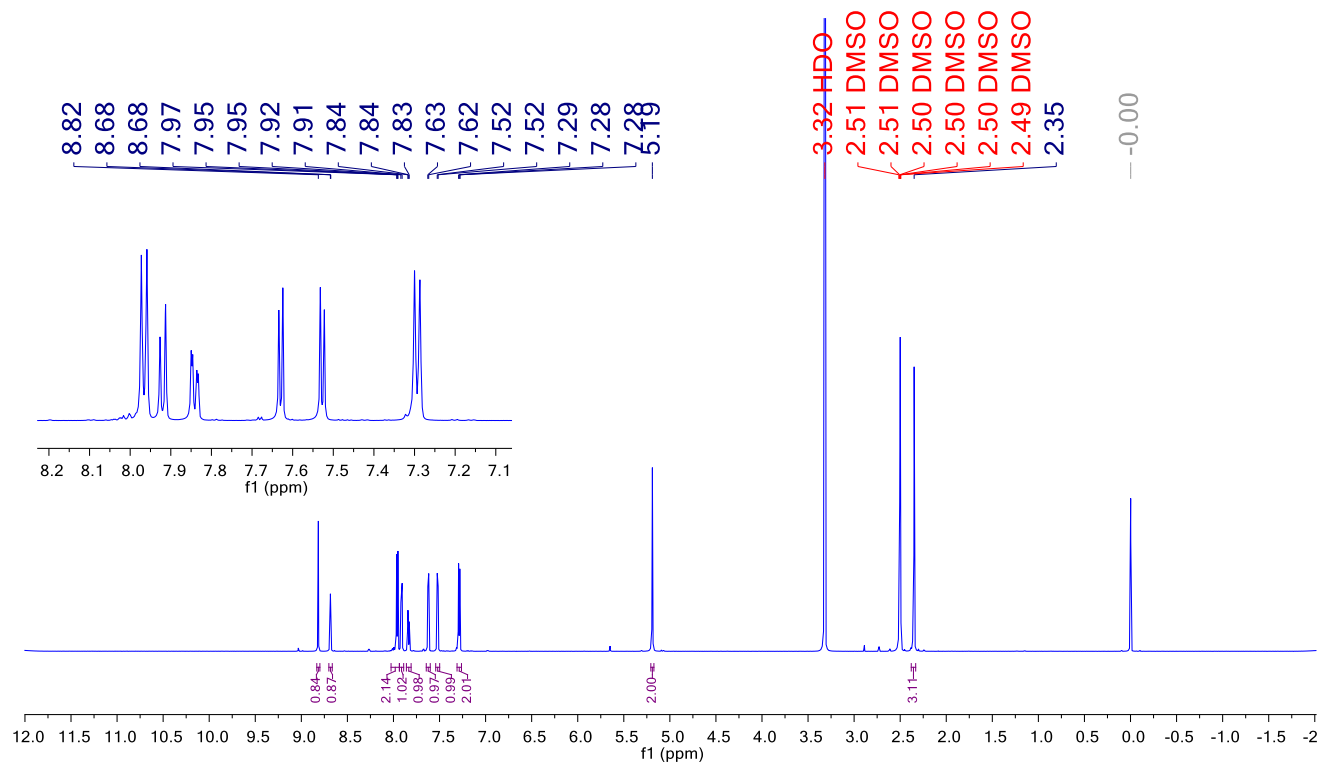



## 2-Nitro-7-((6-(*p*-tolyl)pyridin-3-yl)methyl)imidazo[1,2-*a*]pyrazin-8(7*H*)-one (34h)



### <sup>13</sup>C NMR (150 MHz, DMSO-*d*<sub>6</sub>)

| Parameter                  | Value                                          |
|----------------------------|------------------------------------------------|
| 1 Title                    | CWA9117_023_ppt_MeOH_DCM.2.fid                 |
| 2 Origin                   | Bruker BioSpin GmbH                            |
| 3 Owner                    | nmr                                            |
| 4 Spectrometer             | spect                                          |
| 5 Solvent                  | DMSO                                           |
| 6 Temperature              | 298.0                                          |
| 7 Pulse Sequence           | jmod                                           |
| 8 Experiment               | JMOD                                           |
| 9 Probe                    | Z129649_0009 (CP TCI 600S3 H&F-C/<br>N-D-05 Z) |
| 10 Number of Scans         | 4600                                           |
| 11 Receiver Gain           | 191.6                                          |
| 12 Relaxation Delay        | 1.0000                                         |
| 13 Pulse Width             | 12.0000                                        |
| 14 Presaturation Frequency |                                                |
| 15 Acquisition Time        | 0.8738                                         |
| 16 Acquisition Date        | 2018-09-03T14:00:53                            |
| 17 Modification Date       | 2018-09-03T14:00:53                            |
| 18 Spectrometer Frequency  | 150.92                                         |
| 19 Spectral Width          | 37500.0                                        |
| 20 Lowest Frequency        | -2151.2                                        |
| 21 Nucleus                 | <sup>13</sup> C                                |
| 22 Acquired Size           | 32768                                          |
| 23 Spectral Size           | 65536                                          |

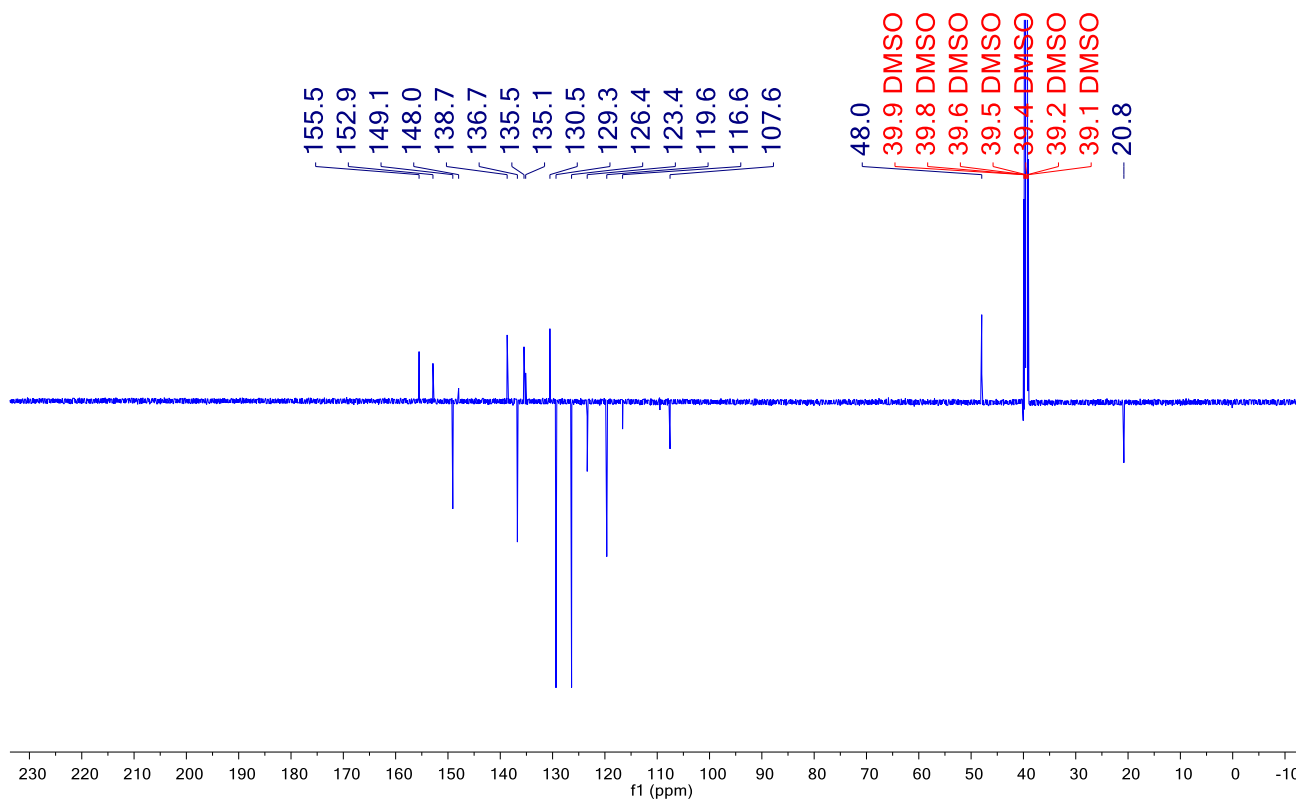

**2-Nitro-7-((6-(3-(trifluoromethoxy)phenyl)pyridin-3-yl)methyl)imidazo[1,2-a]pyrazin-8(7H)-one (34i)**

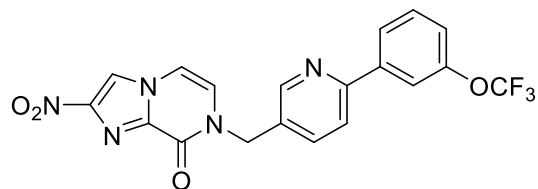

**<sup>1</sup>H NMR (600 MHz, DMSO-d<sub>6</sub>)**

| Parameter                  | Value                                          |
|----------------------------|------------------------------------------------|
| 1 Title                    | CWA8967_114_ppt_MeOH_DCM.1.fid                 |
| 2 Origin                   | Bruker BioSpin GmbH                            |
| 3 Owner                    | nmr                                            |
| 4 Spectrometer             | spect                                          |
| 5 Solvent                  | DMSO                                           |
| 6 Temperature              | 298.0                                          |
| 7 Pulse Sequence           | zg                                             |
| 8 Experiment               | 1D                                             |
| 9 Probe                    | Z129649_0009 (CP TCI 600S3 H&F-C/<br>N-D-05 Z) |
| 10 Number of Scans         | 16                                             |
| 11 Receiver Gain           | 116.1                                          |
| 12 Relaxation Delay        | 5.0000                                         |
| 13 Pulse Width             | 8.0000                                         |
| 14 Presaturation Frequency |                                                |
| 15 Acquisition Time        | 1.9464                                         |
| 16 Acquisition Date        | 2018-08-16T17:57:51                            |
| 17 Modification Date       | 2018-08-16T17:57:51                            |
| 18 Spectrometer Frequency  | 600.13                                         |
| 19 Spectral Width          | 8417.5                                         |
| 20 Lowest Frequency        | -1208.1                                        |
| 21 Nucleus                 | <sup>1</sup> H                                 |
| 22 Acquired Size           | 16384                                          |
| 23 Spectral Size           | 65536                                          |

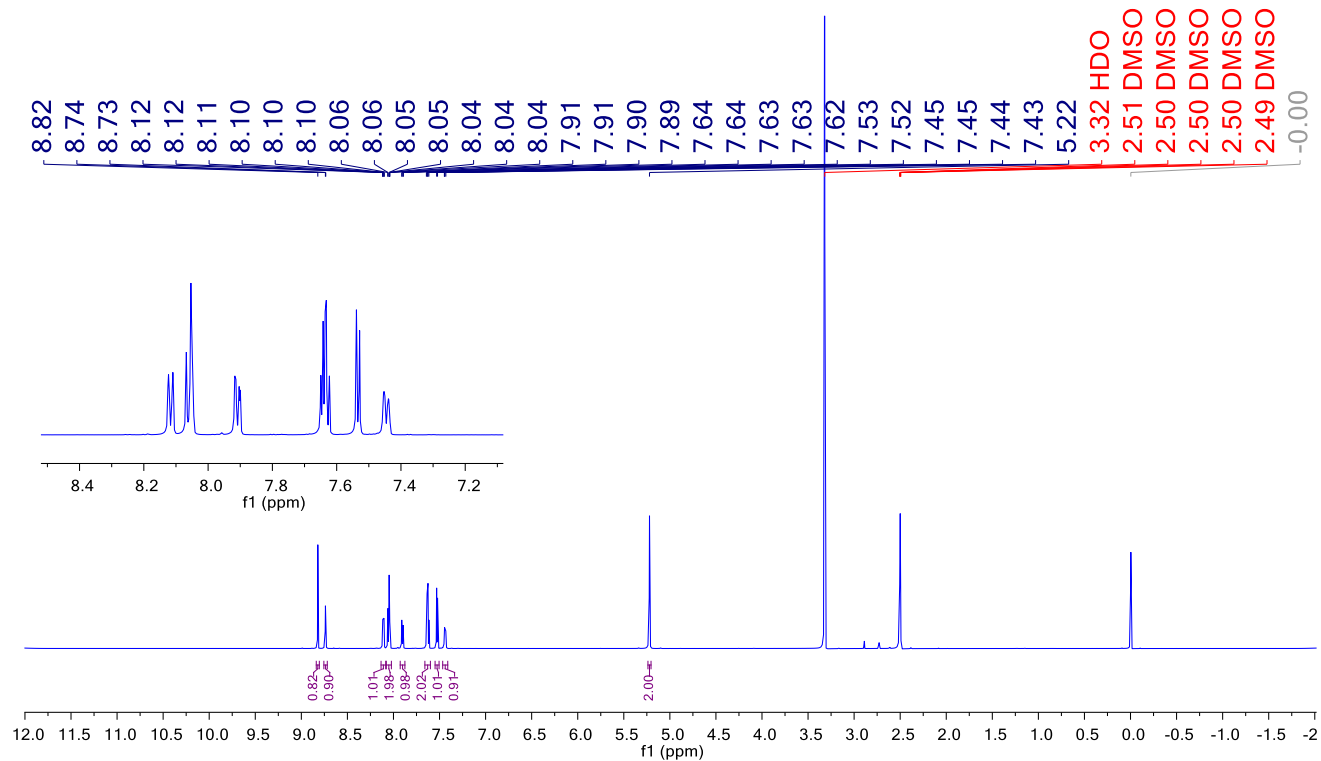

## 2-Nitro-7-((6-(3-(trifluoromethoxy)phenyl)pyridin-3-yl)methyl)imidazo[1,2-a]pyrazin-8(7H)-one (34i)



### <sup>13</sup>C NMR (150 MHz, DMSO-*d*<sub>6</sub>)

| Parameter                  | Value                                          |
|----------------------------|------------------------------------------------|
| 1 Title                    | CWA8967_114_ppT_MeOH_DCM.2.fid                 |
| 2 Origin                   | Bruker BioSpin GmbH                            |
| 3 Owner                    | nmr                                            |
| 4 Spectrometer             | spect                                          |
| 5 Solvent                  | DMSO                                           |
| 6 Temperature              | 298.0                                          |
| 7 Pulse Sequence           | jmod                                           |
| 8 Experiment               | JMOD                                           |
| 9 Probe                    | Z129649_0009 (CP TCI 600S3 H&F-C/<br>N-D-05 Z) |
| 10 Number of Scans         | 9500                                           |
| 11 Receiver Gain           | 191.6                                          |
| 12 Relaxation Delay        | 1.0000                                         |
| 13 Pulse Width             | 12.0000                                        |
| 14 Presaturation Frequency |                                                |
| 15 Acquisition Time        | 0.8738                                         |
| 16 Acquisition Date        | 2018-08-17T05:55:30                            |
| 17 Modification Date       | 2018-08-17T05:55:30                            |
| 18 Spectrometer Frequency  | 150.92                                         |
| 19 Spectral Width          | 37500.0                                        |
| 20 Lowest Frequency        | -2151.2                                        |
| 21 Nucleus                 | <sup>13</sup> C                                |
| 22 Acquired Size           | 32768                                          |
| 23 Spectral Size           | 65536                                          |

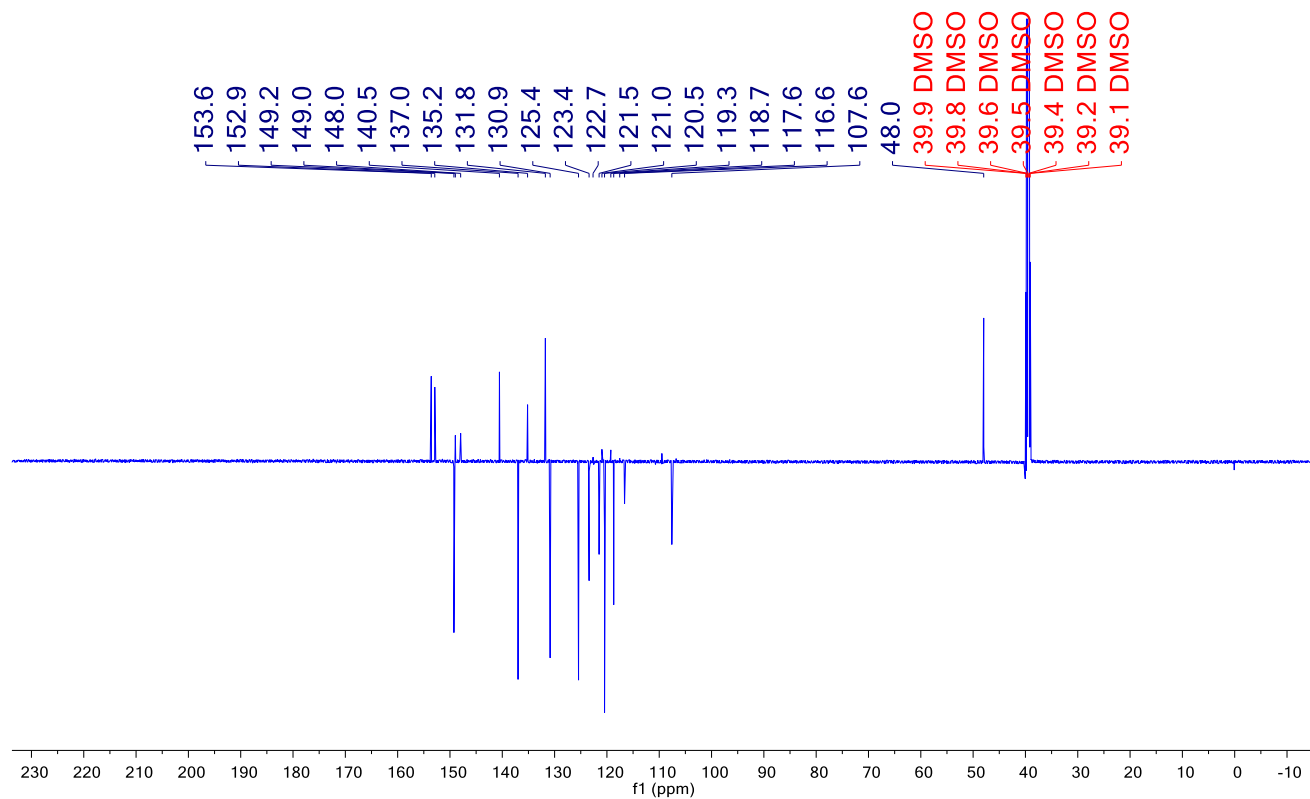



## 2-Nitro-7-((5-(4-(trifluoromethoxy)phenyl)pyridin-2-yl)methyl)imidazo[1,2-a]pyrazin-8(7H)-one (34j)

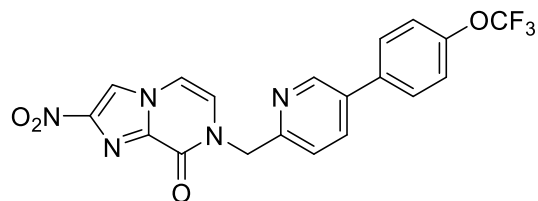

### <sup>13</sup>C NMR (150 MHz, DMSO-*d*<sub>6</sub>)

| Parameter                  | Value                                          |
|----------------------------|------------------------------------------------|
| 1 Title                    | CWA9171_091_ppt_DCM_MeOH.2.fid                 |
| 2 Origin                   | Bruker BioSpin GmbH                            |
| 3 Owner                    | nmr                                            |
| 4 Spectrometer             | spect                                          |
| 5 Solvent                  | DMSO                                           |
| 6 Temperature              | 298.0                                          |
| 7 Pulse Sequence           | jmod                                           |
| 8 Experiment               | JMOD                                           |
| 9 Probe                    | Z129649_0009 (CP TCI 600S3 H&F-C/<br>N-D-05 Z) |
| 10 Number of Scans         | 9000                                           |
| 11 Receiver Gain           | 191.6                                          |
| 12 Relaxation Delay        | 1.0000                                         |
| 13 Pulse Width             | 12.0000                                        |
| 14 Presaturation Frequency |                                                |
| 15 Acquisition Time        | 0.8738                                         |
| 16 Acquisition Date        | 2019-04-18T03:42:49                            |
| 17 Modification Date       | 2019-04-18T03:42:49                            |
| 18 Spectrometer Frequency  | 150.92                                         |
| 19 Spectral Width          | 37500.0                                        |
| 20 Lowest Frequency        | -2151.2                                        |
| 21 Nucleus                 | <sup>13</sup> C                                |
| 22 Acquired Size           | 32768                                          |
| 23 Spectral Size           | 65536                                          |

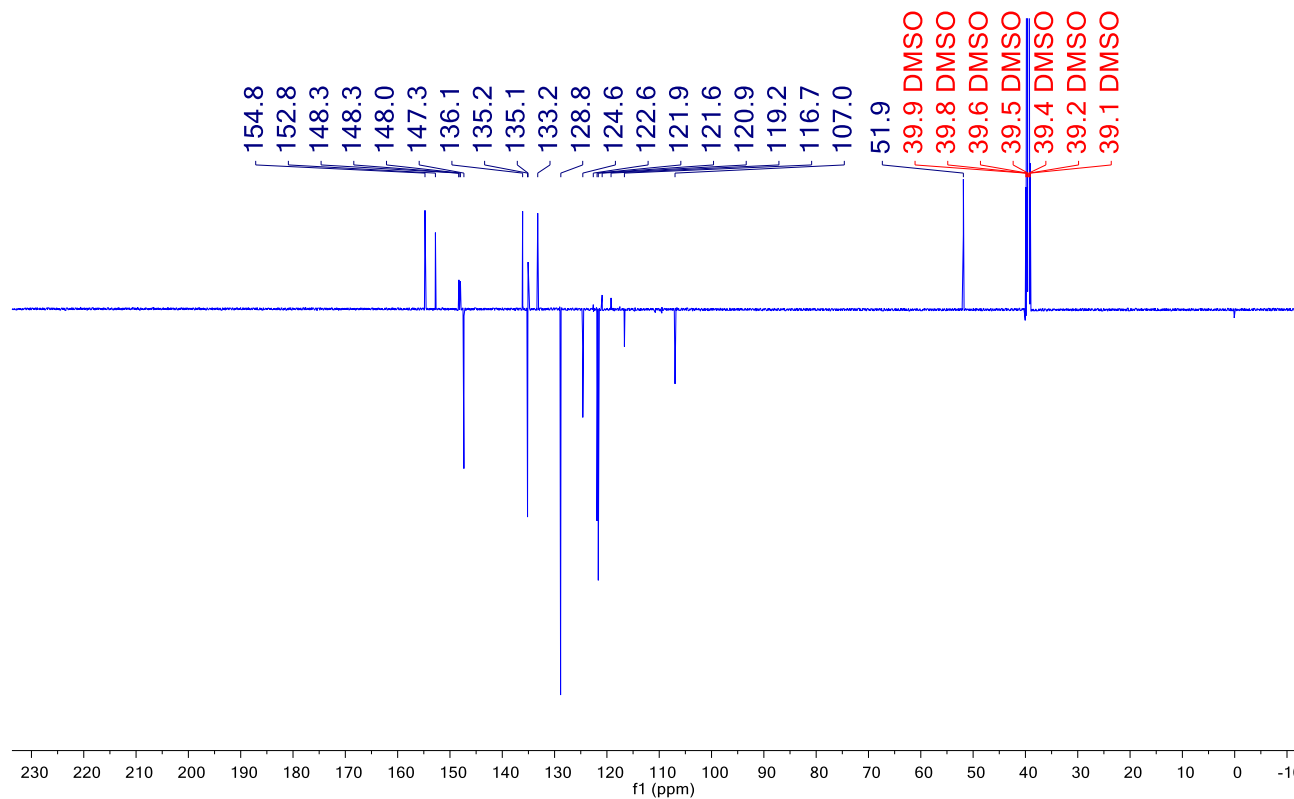

## 2-Nitro-7-((5-(4-(trifluoromethoxy)phenyl)pyridin-3-yl)methyl)imidazo[1,2-a]pyrazin-8(7H)-one (34k)

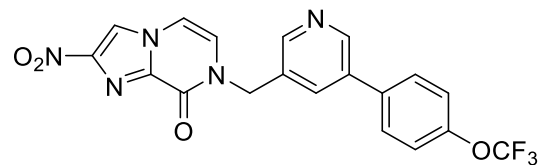

### <sup>1</sup>H NMR (600 MHz, DMSO-d<sub>6</sub>)

| Parameter                  | Value                                          |
|----------------------------|------------------------------------------------|
| 1 Title                    | CWA9117_099_ppt_DCM_MeOH.1.fid                 |
| 2 Origin                   | Bruker BioSpin GmbH                            |
| 3 Owner                    | nmr                                            |
| 4 Spectrometer             | spect                                          |
| 5 Solvent                  | DMSO                                           |
| 6 Temperature              | 298.0                                          |
| 7 Pulse Sequence           | zg                                             |
| 8 Experiment               | 1D                                             |
| 9 Probe                    | Z129649_0009 (CP TCI 600S3 H&F-C/<br>N-D-05 Z) |
| 10 Number of Scans         | 16                                             |
| 11 Receiver Gain           | 140.4                                          |
| 12 Relaxation Delay        | 5.0000                                         |
| 13 Pulse Width             | 8.0000                                         |
| 14 Presaturation Frequency |                                                |
| 15 Acquisition Time        | 1.9464                                         |
| 16 Acquisition Date        | 2018-10-07T11:53:36                            |
| 17 Modification Date       | 2018-10-07T11:53:36                            |
| 18 Spectrometer Frequency  | 600.13                                         |
| 19 Spectral Width          | 8417.5                                         |
| 20 Lowest Frequency        | -1208.1                                        |
| 21 Nucleus                 | <sup>1</sup> H                                 |
| 22 Acquired Size           | 16384                                          |
| 23 Spectral Size           | 65536                                          |

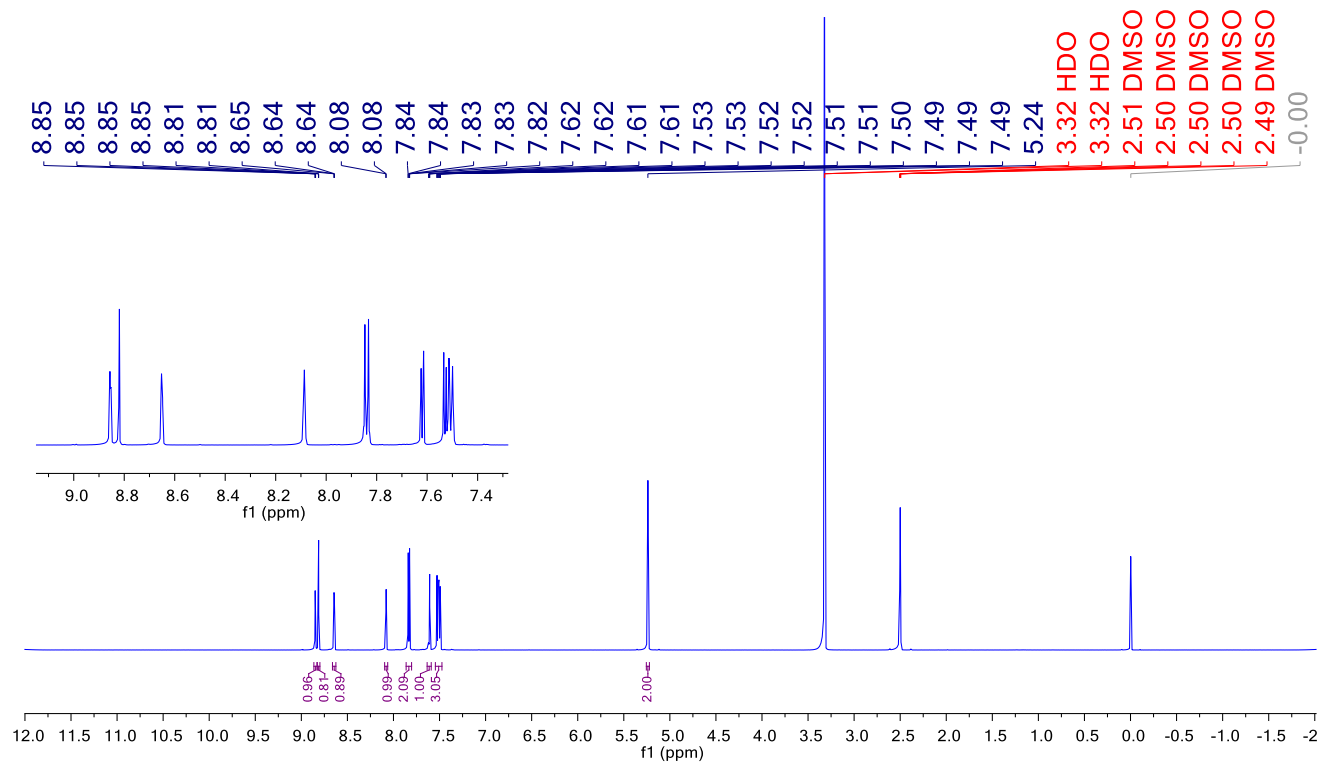

## 2-Nitro-7-((5-(4-(trifluoromethoxy)phenyl)pyridin-3-yl)methyl)imidazo[1,2-a]pyrazin-8(7H)-one (34k)

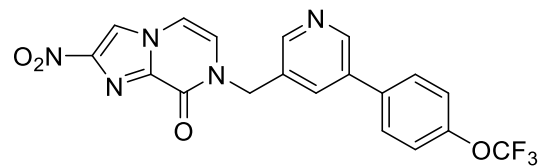

### $^{13}\text{C}$ NMR (150 MHz, DMSO- $d_6$ )

| Parameter                  | Value                                          |
|----------------------------|------------------------------------------------|
| 1 Title                    | CWA9117_099_ppt_DCM_MeOH.2.fid                 |
| 2 Origin                   | Bruker BioSpin GmbH                            |
| 3 Owner                    | nmr                                            |
| 4 Spectrometer             | spect                                          |
| 5 Solvent                  | DMSO                                           |
| 6 Temperature              | 298.0                                          |
| 7 Pulse Sequence           | jmod                                           |
| 8 Experiment               | JMOD                                           |
| 9 Probe                    | Z129649_0009 (CP TCI 600S3 H&F-C/<br>N-D-05 Z) |
| 10 Number of Scans         | 9500                                           |
| 11 Receiver Gain           | 191.6                                          |
| 12 Relaxation Delay        | 1.0000                                         |
| 13 Pulse Width             | 12.0000                                        |
| 14 Presaturation Frequency |                                                |
| 15 Acquisition Time        | 0.8738                                         |
| 16 Acquisition Date        | 2018-10-07T17:18:52                            |
| 17 Modification Date       | 2018-10-07T17:18:52                            |
| 18 Spectrometer Frequency  | 150.92                                         |
| 19 Spectral Width          | 37500.0                                        |
| 20 Lowest Frequency        | -2151.2                                        |
| 21 Nucleus                 | $^{13}\text{C}$                                |
| 22 Acquired Size           | 32768                                          |
| 23 Spectral Size           | 65536                                          |

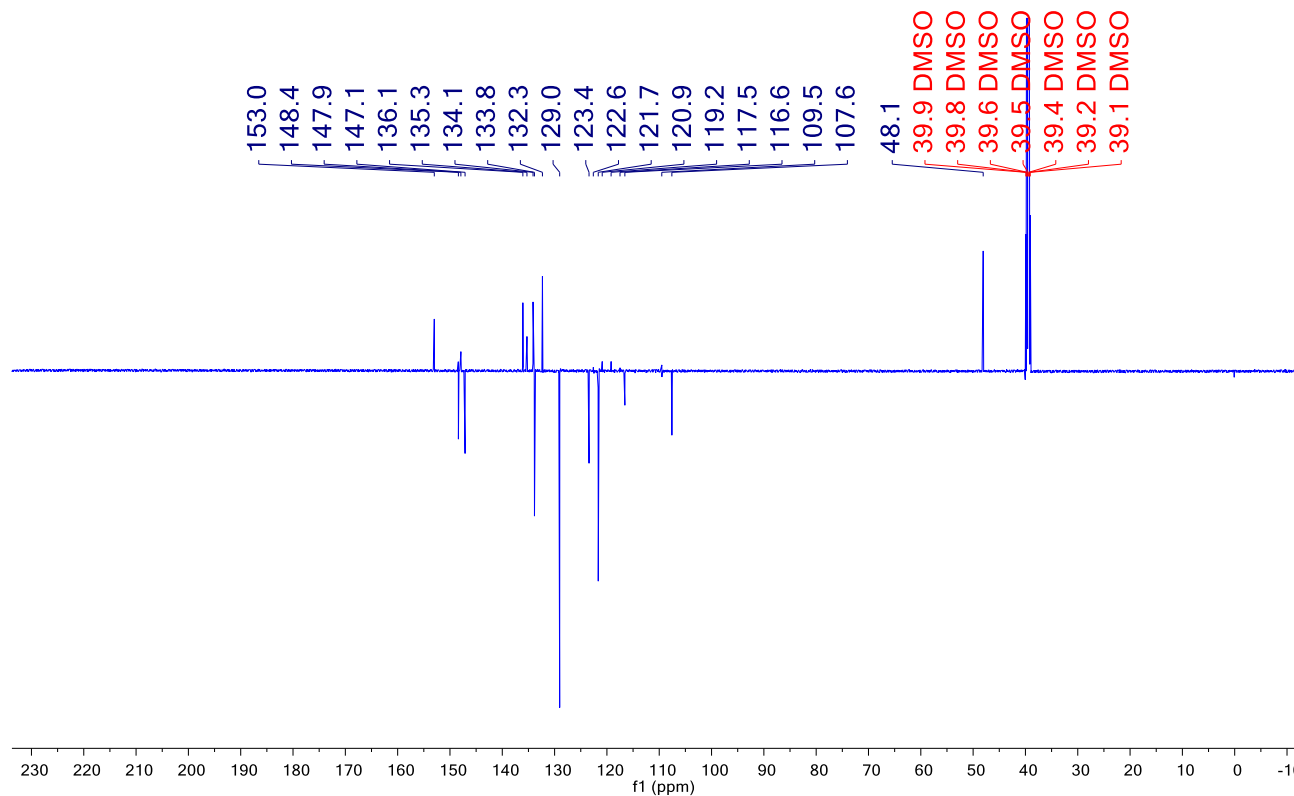

## 2-Nitro-7-((5-(*p*-tolyl)pyridin-3-yl)methyl)imidazo[1,2-*a*]pyrazin-8(7*H*)-one (34l)

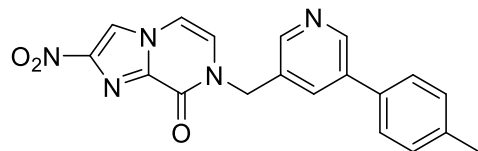

### <sup>1</sup>H NMR (600 MHz, DMSO-*d*<sub>6</sub>)

| Parameter                  | Value                                          |
|----------------------------|------------------------------------------------|
| 1 Title                    | CWA9171_090_ppt_DCM_MeOH.1.fid                 |
| 2 Origin                   | Bruker BioSpin GmbH                            |
| 3 Owner                    | nmr                                            |
| 4 Spectrometer             | spect                                          |
| 5 Solvent                  | DMSO                                           |
| 6 Temperature              | 298.0                                          |
| 7 Pulse Sequence           | zg                                             |
| 8 Experiment               | 1D                                             |
| 9 Probe                    | Z129649_0009 (CP TCI 600S3 H&F-C/<br>N-D-05 Z) |
| 10 Number of Scans         | 16                                             |
| 11 Receiver Gain           | 59.7                                           |
| 12 Relaxation Delay        | 5.0000                                         |
| 13 Pulse Width             | 8.0000                                         |
| 14 Presaturation Frequency |                                                |
| 15 Acquisition Time        | 1.9464                                         |
| 16 Acquisition Date        | 2019-04-17T17:05:39                            |
| 17 Modification Date       | 2019-04-17T17:05:39                            |
| 18 Spectrometer Frequency  | 600.13                                         |
| 19 Spectral Width          | 8417.5                                         |
| 20 Lowest Frequency        | -1208.1                                        |
| 21 Nucleus                 | <sup>1</sup> H                                 |
| 22 Acquired Size           | 16384                                          |
| 23 Spectral Size           | 65536                                          |

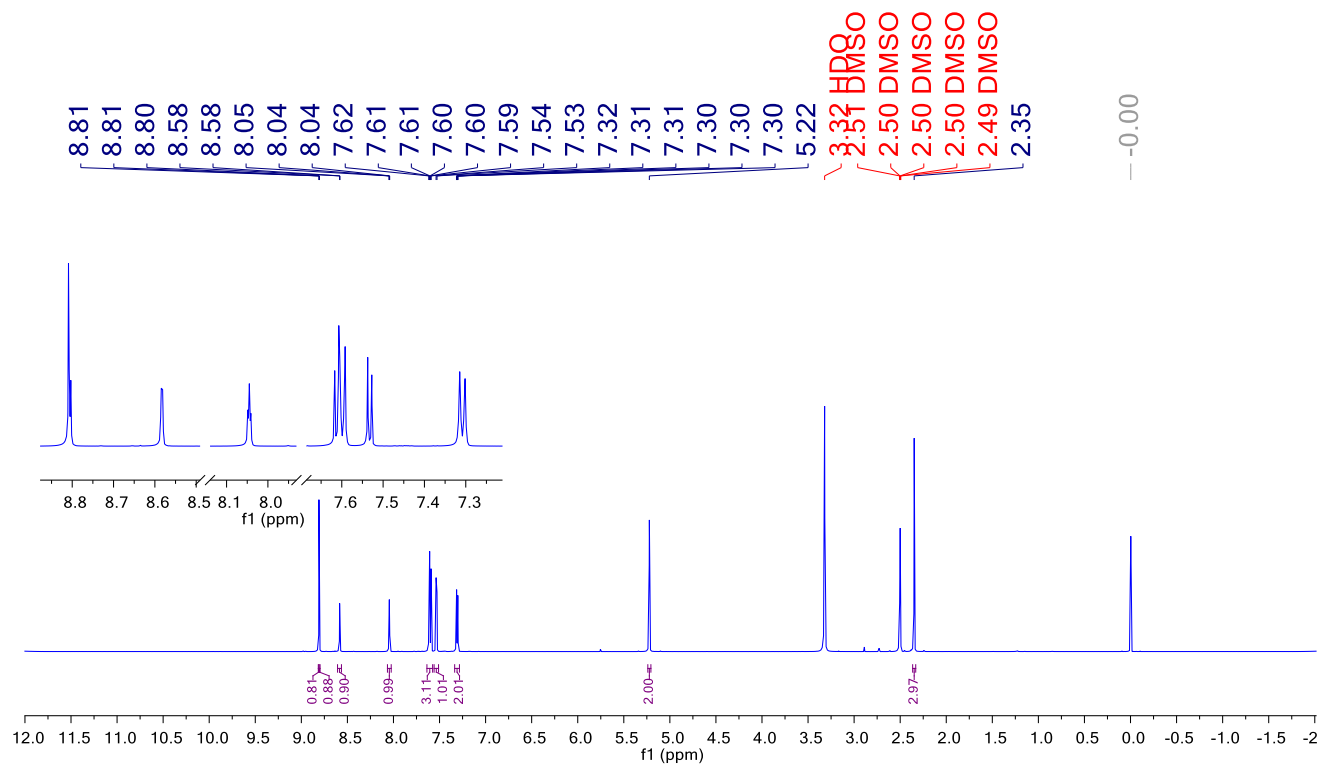



## 2-Nitro-7-((5-(*p*-tolyl)pyridin-3-yl)methyl)imidazo[1,2-*a*]pyrazin-8(7*H*)-one (34l)



### <sup>13</sup>C NMR (150 MHz, DMSO-*d*<sub>6</sub>)

| Parameter                  | Value                                          |
|----------------------------|------------------------------------------------|
| 1 Title                    | CWA9171_090_ppt_DCM_MeOH.2.fid                 |
| 2 Origin                   | Bruker BioSpin GmbH                            |
| 3 Owner                    | nmr                                            |
| 4 Spectrometer             | spect                                          |
| 5 Solvent                  | DMSO                                           |
| 6 Temperature              | 298.0                                          |
| 7 Pulse Sequence           | jmod                                           |
| 8 Experiment               | JMOD                                           |
| 9 Probe                    | Z129649_0009 (CP TCI 600S3 H&F-C/<br>N-D-05 Z) |
| 10 Number of Scans         | 6500                                           |
| 11 Receiver Gain           | 191.6                                          |
| 12 Relaxation Delay        | 1.0000                                         |
| 13 Pulse Width             | 12.0000                                        |
| 14 Presaturation Frequency |                                                |
| 15 Acquisition Time        | 0.8738                                         |
| 16 Acquisition Date        | 2019-04-17T20:34:03                            |
| 17 Modification Date       | 2019-04-17T20:34:04                            |
| 18 Spectrometer Frequency  | 150.92                                         |
| 19 Spectral Width          | 37500.0                                        |
| 20 Lowest Frequency        | -2151.2                                        |
| 21 Nucleus                 | <sup>13</sup> C                                |
| 22 Acquired Size           | 32768                                          |
| 23 Spectral Size           | 65536                                          |

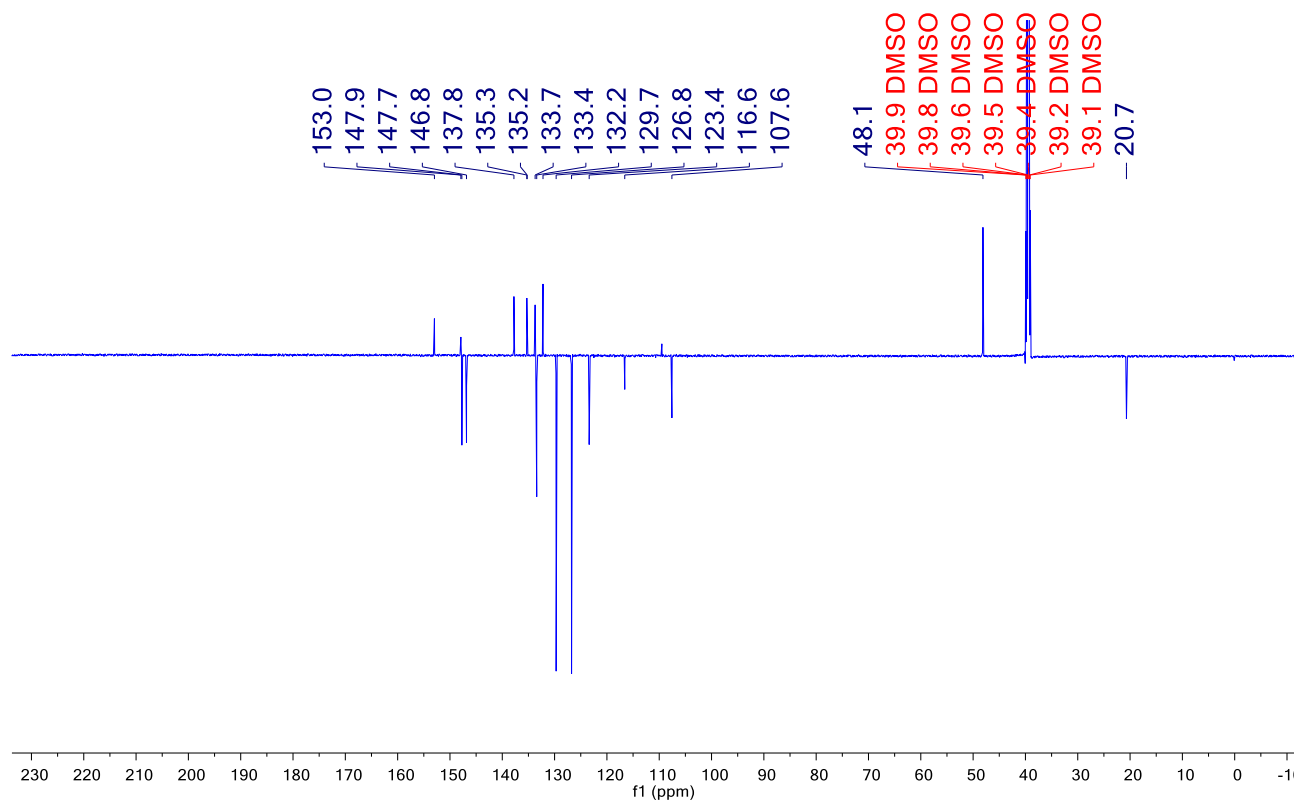

## 2-Nitro-7-((5-(3-(trifluoromethoxy)phenyl)pyridin-3-yl)methyl)imidazo[1,2-a]pyrazin-8(7H)-one (34m)

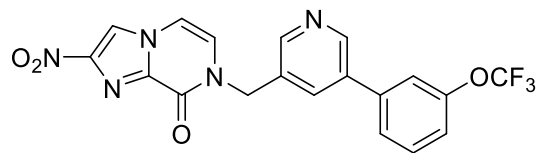

### <sup>1</sup>H NMR (600 MHz, DMSO-d<sub>6</sub>)

| Parameter                  | Value                                          |
|----------------------------|------------------------------------------------|
| 1 Title                    | CWA91117_115_ppt_DCM_MeOH.1.fid                |
| 2 Origin                   | Bruker BioSpin GmbH                            |
| 3 Owner                    | nmr                                            |
| 4 Spectrometer             | spect                                          |
| 5 Solvent                  | DMSO                                           |
| 6 Temperature              | 298.0                                          |
| 7 Pulse Sequence           | zg                                             |
| 8 Experiment               | 1D                                             |
| 9 Probe                    | Z129649_0009 (CP TCI 600S3 H&F-C/<br>N-D-05 Z) |
| 10 Number of Scans         | 16                                             |
| 11 Receiver Gain           | 155.2                                          |
| 12 Relaxation Delay        | 5.0000                                         |
| 13 Pulse Width             | 8.0000                                         |
| 14 Presaturation Frequency |                                                |
| 15 Acquisition Time        | 1.9464                                         |
| 16 Acquisition Date        | 2018-10-16T17:18:51                            |
| 17 Modification Date       | 2018-10-16T17:18:51                            |
| 18 Spectrometer Frequency  | 600.13                                         |
| 19 Spectral Width          | 8417.5                                         |
| 20 Lowest Frequency        | -1208.1                                        |
| 21 Nucleus                 | 1H                                             |
| 22 Acquired Size           | 16384                                          |
| 23 Spectral Size           | 65536                                          |

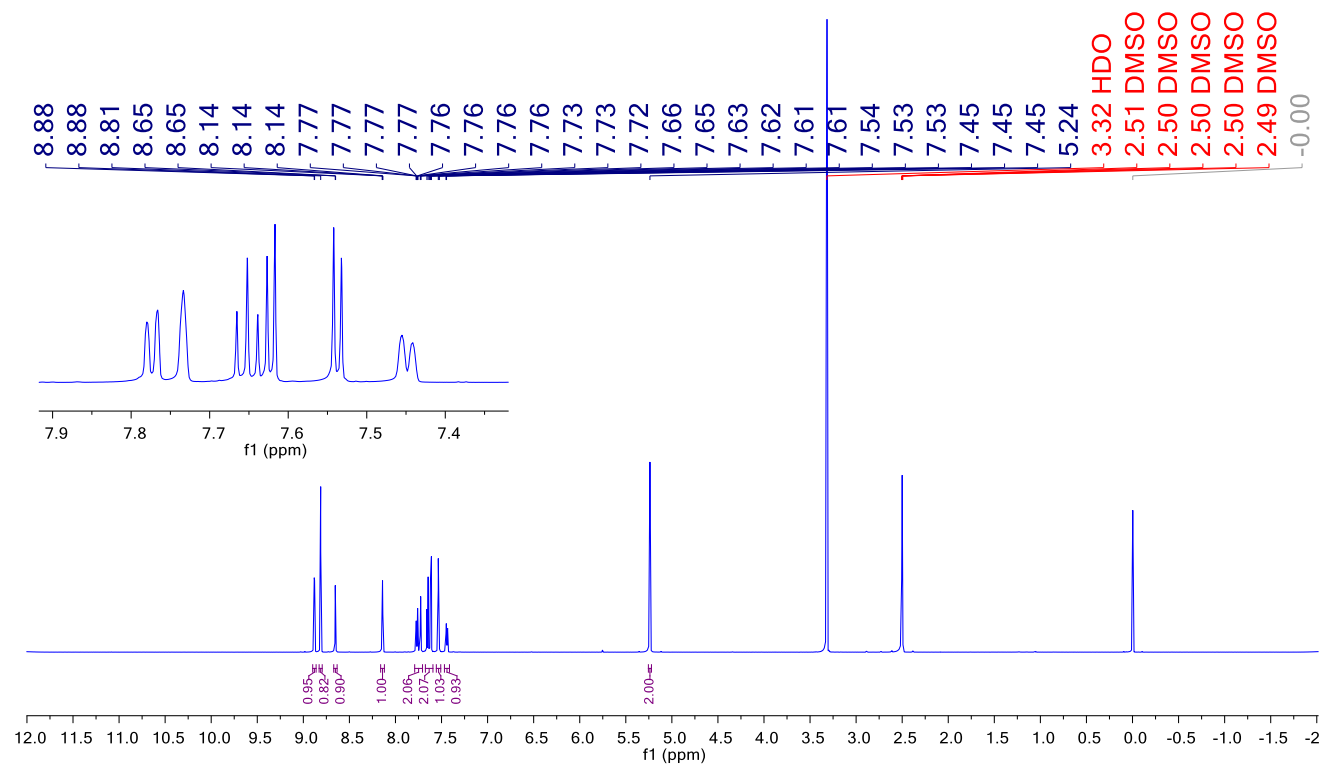

## 2-Nitro-7-((5-(3-(trifluoromethoxy)phenyl)pyridin-3-yl)methyl)imidazo[1,2-a]pyrazin-8(7H)-one (34m)

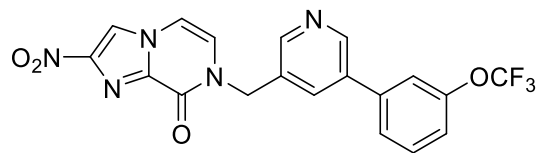

### <sup>13</sup>C NMR (150 MHz, DMSO-d<sub>6</sub>)

| Parameter                  | Value                                          |
|----------------------------|------------------------------------------------|
| 1 Title                    | CWA9117_115_ppt_DCM_MeOH.2.fid                 |
| 2 Origin                   | Bruker BioSpin GmbH                            |
| 3 Owner                    | nmr                                            |
| 4 Spectrometer             | spect                                          |
| 5 Solvent                  | DMSO                                           |
| 6 Temperature              | 298.0                                          |
| 7 Pulse Sequence           | jmod                                           |
| 8 Experiment               | JMOD                                           |
| 9 Probe                    | Z129649_0009 (CP TCI 600S3 H&F-C/<br>N-D-05 Z) |
| 10 Number of Scans         | 10000                                          |
| 11 Receiver Gain           | 191.6                                          |
| 12 Relaxation Delay        | 1.0000                                         |
| 13 Pulse Width             | 12.0000                                        |
| 14 Presaturation Frequency |                                                |
| 15 Acquisition Time        | 0.8738                                         |
| 16 Acquisition Date        | 2018-10-16T22:39:45                            |
| 17 Modification Date       | 2018-10-16T22:39:45                            |
| 18 Spectrometer Frequency  | 150.92                                         |
| 19 Spectral Width          | 37500.0                                        |
| 20 Lowest Frequency        | -2151.2                                        |
| 21 Nucleus                 | <sup>13</sup> C                                |
| 22 Acquired Size           | 32768                                          |
| 23 Spectral Size           | 65536                                          |

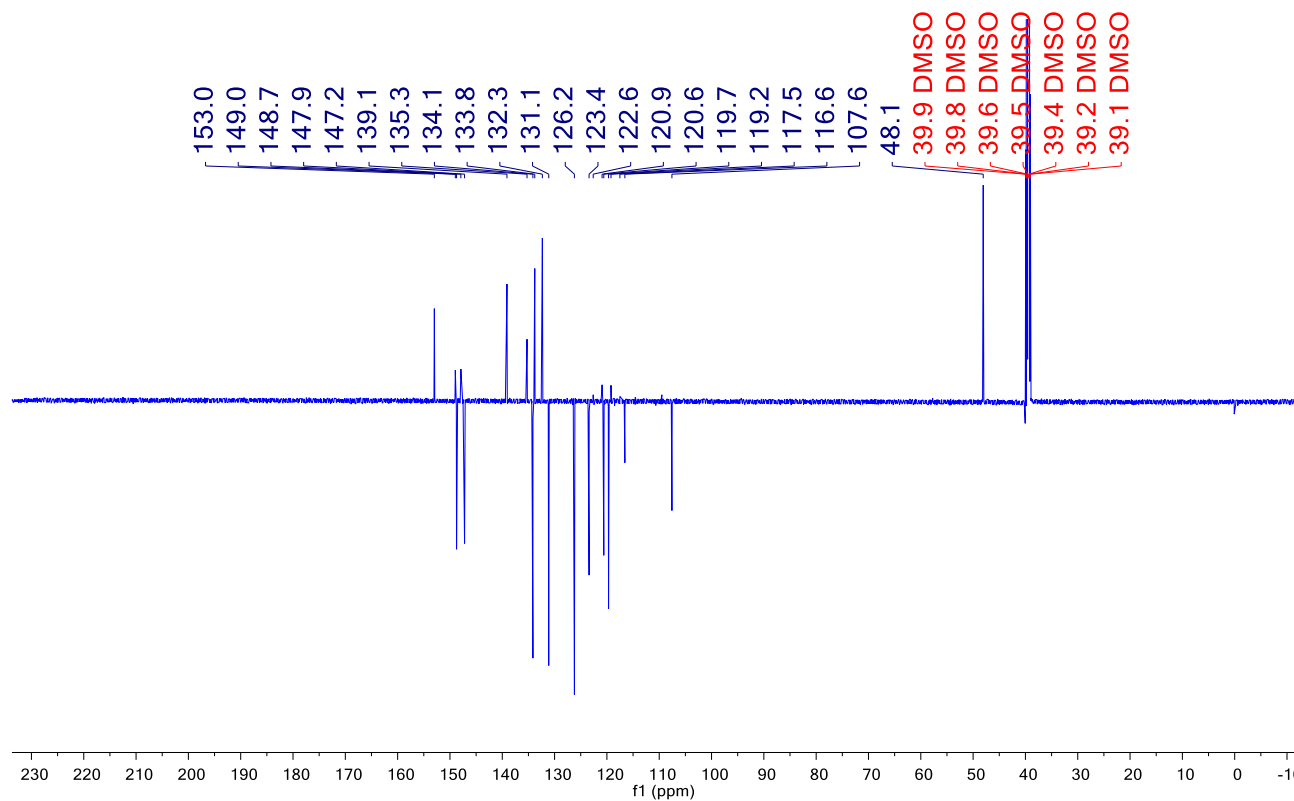

## 2-Nitro-7-(4-(thiazol-2-yl)benzyl)imidazo[1,2-a]pyrazin-8(7H)-one (34n)

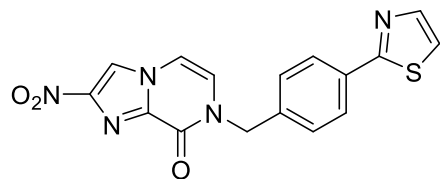

### <sup>1</sup>H NMR (600 MHz, DMSO-d<sub>6</sub>)

| Parameter                  | Value                                   |
|----------------------------|-----------------------------------------|
| 1 Title                    | CWA9117_072_ppt_DCM_MeOH.1.fid          |
| 2 Origin                   | Bruker BioSpin GmbH                     |
| 3 Owner                    | biodiversity                            |
| 4 Spectrometer             | spect                                   |
| 5 Solvent                  | DMSO                                    |
| 6 Temperature              | 298.0                                   |
| 7 Pulse Sequence           | zg                                      |
| 8 Experiment               | 1D                                      |
| 9 Probe                    | 5 mm PASEI 1H/ D-13C Z-GRD Z866801/0003 |
| 10 Number of Scans         | 16                                      |
| 11 Receiver Gain           | 287.0                                   |
| 12 Relaxation Delay        | 5.0000                                  |
| 13 Pulse Width             | 9.8000                                  |
| 14 Presaturation Frequency |                                         |
| 15 Acquisition Time        | 1.9465                                  |
| 16 Acquisition Date        | 2018-09-18T14:53:00                     |
| 17 Modification Date       | 2018-09-18T14:53:58                     |
| 18 Spectrometer Frequency  | 600.08                                  |
| 19 Spectral Width          | 8417.5                                  |
| 20 Lowest Frequency        | -308.1                                  |
| 21 Nucleus                 | 1H                                      |
| 22 Acquired Size           | 16384                                   |
| 23 Spectral Size           | 65536                                   |

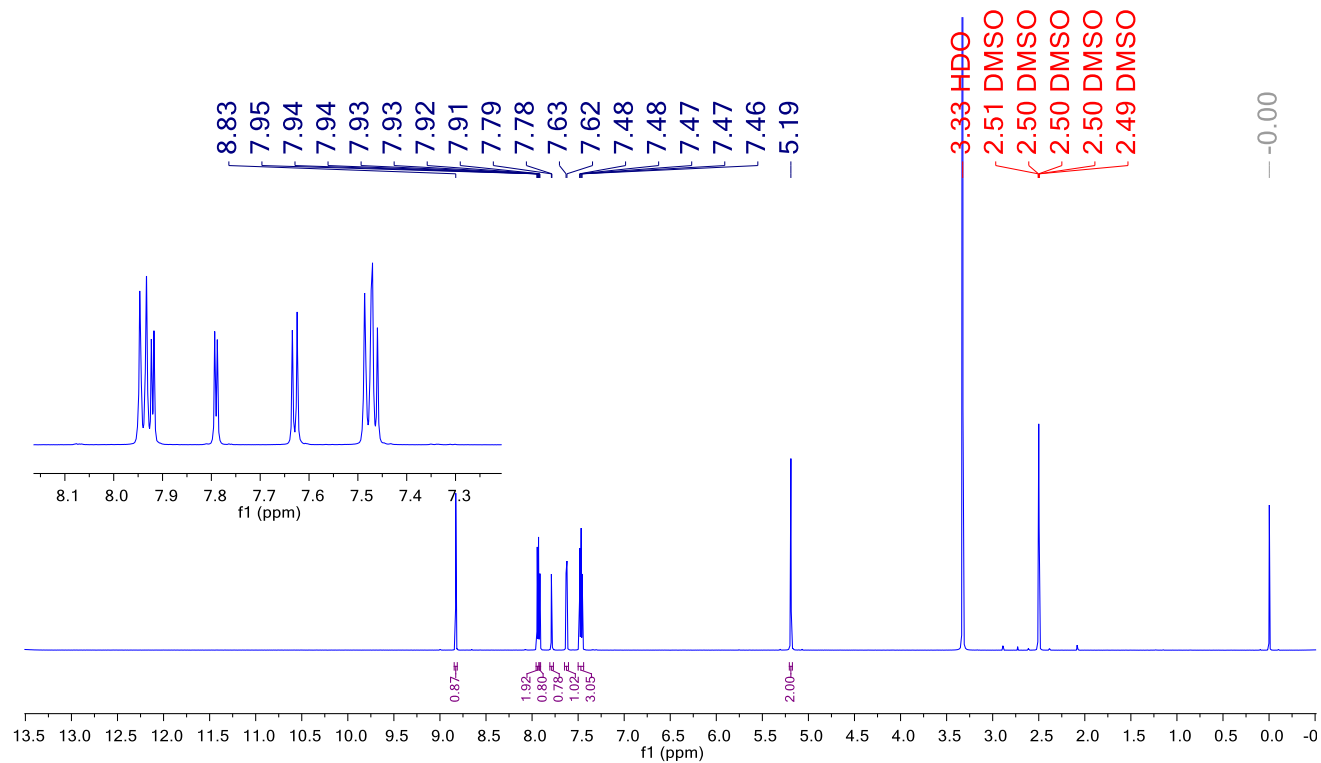

## 2-Nitro-7-(4-(thiazol-2-yl)benzyl)imidazo[1,2-a]pyrazin-8(7H)-one (34n)

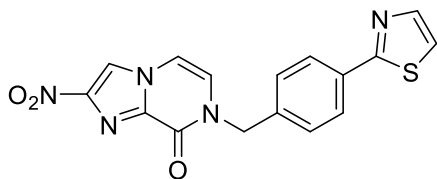

### <sup>13</sup>C NMR (150 MHz, DMSO-*d*<sub>6</sub>)

| Parameter                  | Value                                   |
|----------------------------|-----------------------------------------|
| 1 Title                    | CWA9117_072_ppt_DCM_MeOH.2.fid          |
| 2 Origin                   | Bruker BioSpin GmbH                     |
| 3 Owner                    | biodiversity                            |
| 4 Spectrometer             | spect                                   |
| 5 Solvent                  | DMSO                                    |
| 6 Temperature              | 297.9                                   |
| 7 Pulse Sequence           | jmod                                    |
| 8 Experiment               | JMOD                                    |
| 9 Probe                    | 5 mm PASEI 1H/ D-13C Z-GRD Z866801/0003 |
| 10 Number of Scans         | 7500                                    |
| 11 Receiver Gain           | 2050.0                                  |
| 12 Relaxation Delay        | 1.0000                                  |
| 13 Pulse Width             | 14.0000                                 |
| 14 Presaturation Frequency |                                         |
| 15 Acquisition Time        | 0.8739                                  |
| 16 Acquisition Date        | 2018-09-18T21:45:00                     |
| 17 Modification Date       | 2018-09-18T21:45:36                     |
| 18 Spectrometer Frequency  | 150.91                                  |
| 19 Spectral Width          | 37500.0                                 |
| 20 Lowest Frequency        | -2227.5                                 |
| 21 Nucleus                 | 13C                                     |
| 22 Acquired Size           | 32768                                   |
| 23 Spectral Size           | 65536                                   |

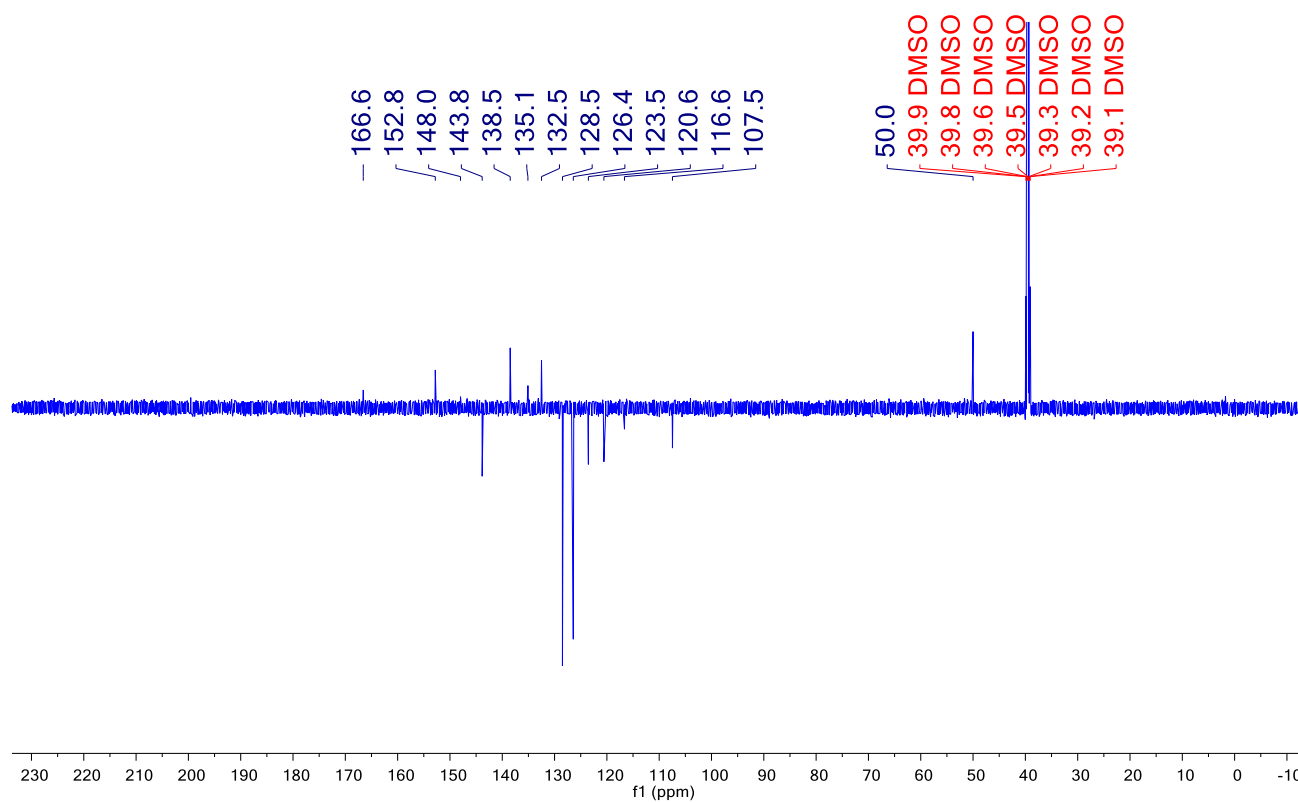

## 2-Nitro-7-((2-phenylthiazol-5-yl)methyl)imidazo[1,2-a]pyrazin-8(7H)-one (34o)

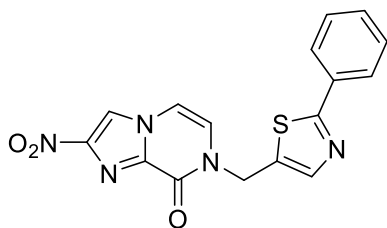

### <sup>1</sup>H NMR (600 MHz, DMSO-d<sub>6</sub>)

| Parameter                  | Value                                          |
|----------------------------|------------------------------------------------|
| 1 Title                    | CWA9117_100_ppt_DCM_MeOH.1.fid                 |
| 2 Origin                   | Bruker BioSpin GmbH                            |
| 3 Owner                    | nmr                                            |
| 4 Spectrometer             | spect                                          |
| 5 Solvent                  | DMSO                                           |
| 6 Temperature              | 298.0                                          |
| 7 Pulse Sequence           | zg                                             |
| 8 Experiment               | 1D                                             |
| 9 Probe                    | Z129649_0009 (CP TCI 600S3 H&F-C/<br>N-D-05 Z) |
| 10 Number of Scans         | 16                                             |
| 11 Receiver Gain           | 109.3                                          |
| 12 Relaxation Delay        | 5.0000                                         |
| 13 Pulse Width             | 8.0000                                         |
| 14 Presaturation Frequency |                                                |
| 15 Acquisition Time        | 1.9464                                         |
| 16 Acquisition Date        | 2018-10-23T12:59:20                            |
| 17 Modification Date       | 2018-10-23T12:59:20                            |
| 18 Spectrometer Frequency  | 600.13                                         |
| 19 Spectral Width          | 8417.5                                         |
| 20 Lowest Frequency        | -1208.1                                        |
| 21 Nucleus                 | 1H                                             |
| 22 Acquired Size           | 16384                                          |
| 23 Spectral Size           | 65536                                          |

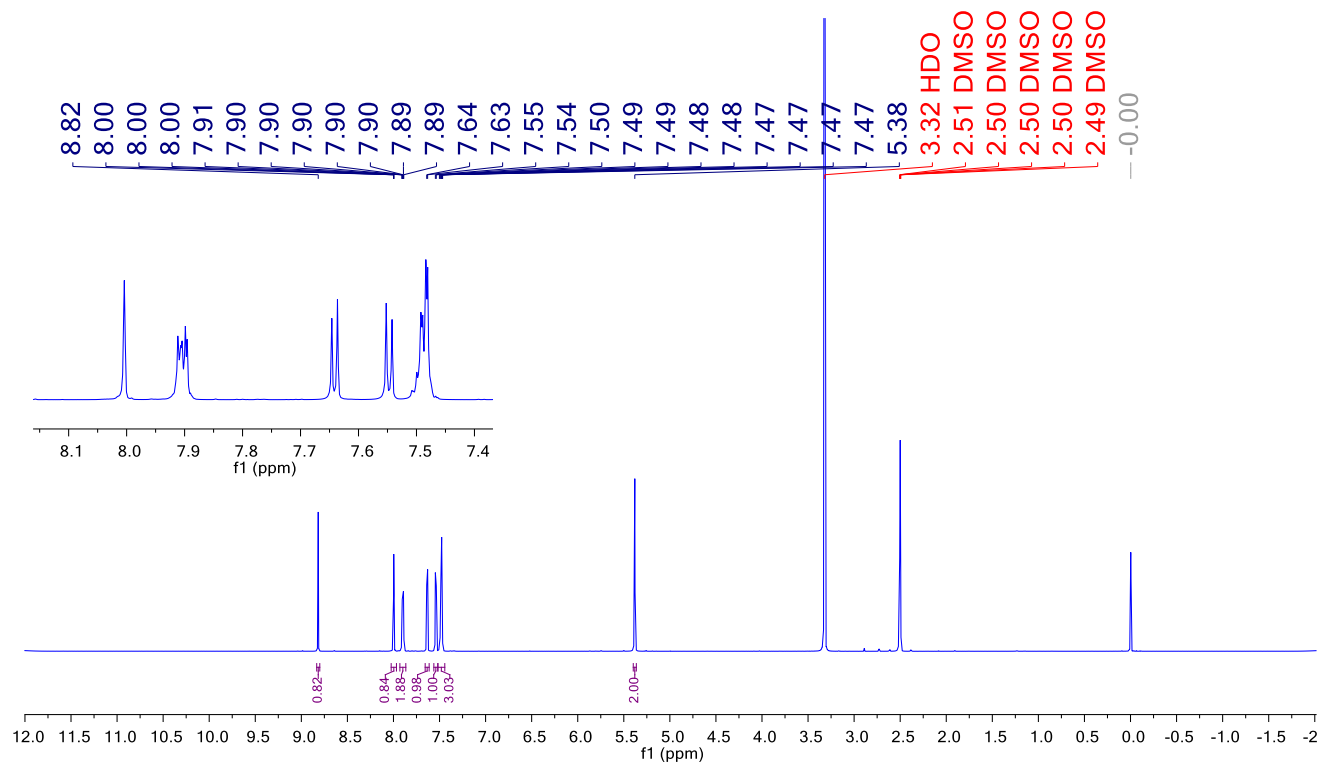

## 2-Nitro-7-((2-phenylthiazol-5-yl)methyl)imidazo[1,2-a]pyrazin-8(7H)-one (34o)

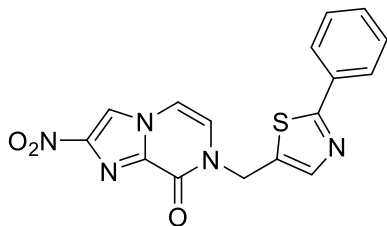

### $^{13}\text{C}$ NMR (150 MHz, DMSO- $d_6$ )

| Parameter                  | Value                                          |
|----------------------------|------------------------------------------------|
| 1 Title                    | CWA9117_100_ppt_DCM_MeOH.2.fid                 |
| 2 Origin                   | Bruker BioSpin GmbH                            |
| 3 Owner                    | nmr                                            |
| 4 Spectrometer             | spect                                          |
| 5 Solvent                  | DMSO                                           |
| 6 Temperature              | 298.0                                          |
| 7 Pulse Sequence           | jmod                                           |
| 8 Experiment               | JMOD                                           |
| 9 Probe                    | Z129649_0009 (CP TCI 600S3 H&F-C/<br>N-D-05 Z) |
| 10 Number of Scans         | 5200                                           |
| 11 Receiver Gain           | 191.6                                          |
| 12 Relaxation Delay        | 1.0000                                         |
| 13 Pulse Width             | 12.0000                                        |
| 14 Presaturation Frequency |                                                |
| 15 Acquisition Time        | 0.8738                                         |
| 16 Acquisition Date        | 2018-10-23T15:46:56                            |
| 17 Modification Date       | 2018-10-23T15:46:56                            |
| 18 Spectrometer Frequency  | 150.92                                         |
| 19 Spectral Width          | 37500.0                                        |
| 20 Lowest Frequency        | -2151.2                                        |
| 21 Nucleus                 | $^{13}\text{C}$                                |
| 22 Acquired Size           | 32768                                          |
| 23 Spectral Size           | 65536                                          |

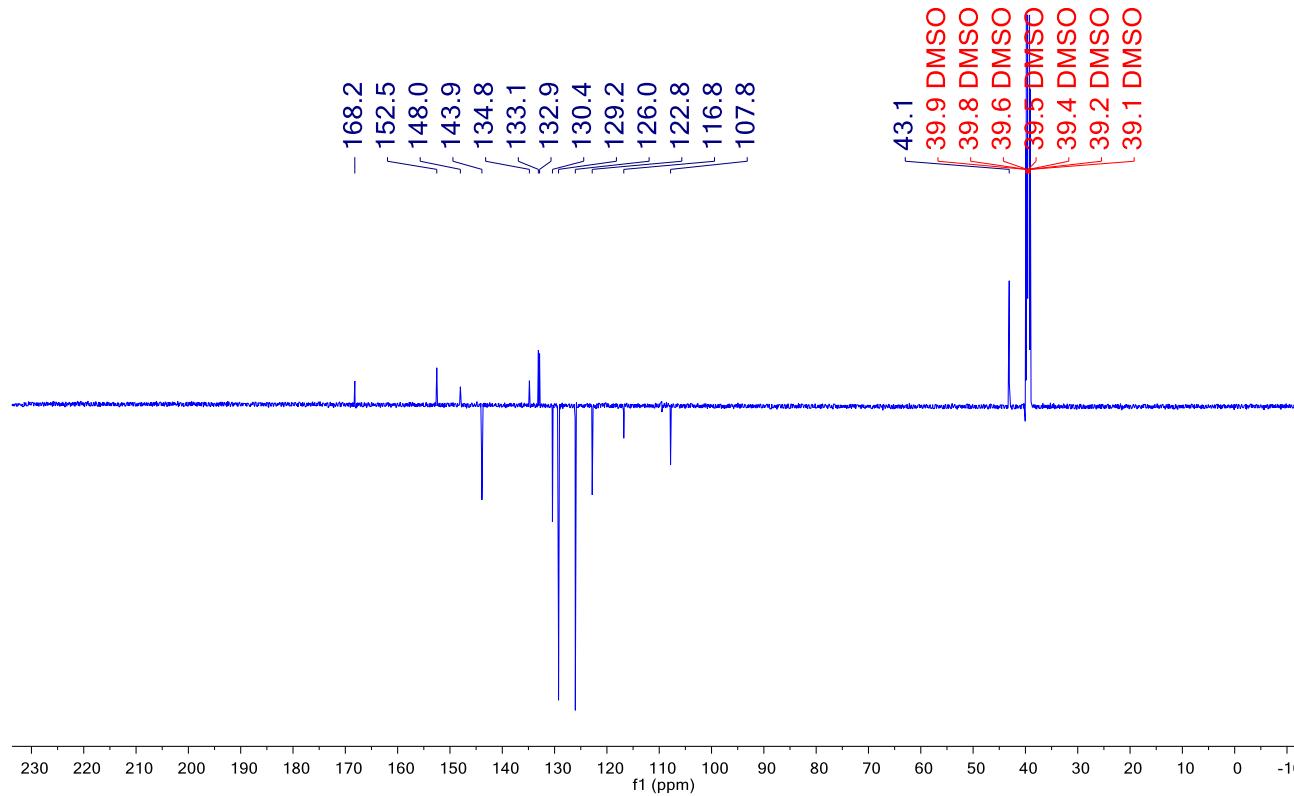

## 2-Nitro-7-(4-(piperidin-1-yl)benzyl)imidazo[1,2-a]pyrazin-8(7H)-one (34p)

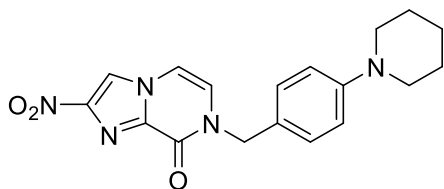

### <sup>1</sup>H NMR (600 MHz, DMSO-d<sub>6</sub>)

| Parameter                  | Value                                          |
|----------------------------|------------------------------------------------|
| 1 Title                    | CWA8967_055_ppt_DCM_Me<br>OH_cryoprobe.1.fid   |
| 2 Origin                   | Bruker BioSpin GmbH                            |
| 3 Owner                    | nmr                                            |
| 4 Spectrometer             | spect                                          |
| 5 Solvent                  | DMSO                                           |
| 6 Temperature              | 298.0                                          |
| 7 Pulse Sequence           | zg                                             |
| 8 Experiment               | 1D                                             |
| 9 Probe                    | Z129649_0009 (CP TCI 600S3<br>H&F-C/ N-D-05 Z) |
| 10 Number of Scans         | 32                                             |
| 11 Receiver Gain           | 59.7                                           |
| 12 Relaxation Delay        | 5.0000                                         |
| 13 Pulse Width             | 8.0000                                         |
| 14 Presaturation Frequency |                                                |
| 15 Acquisition Time        | 1.9464                                         |
| 16 Acquisition Date        | 2018-05-16T02:12:37                            |
| 17 Modification Date       | 2018-05-16T02:12:37                            |
| 18 Spectrometer Frequency  | 600.13                                         |
| 19 Spectral Width          | 8417.5                                         |
| 20 Lowest Frequency        | -1208.1                                        |
| 21 Nucleus                 | <sup>1</sup> H                                 |
| 22 Acquired Size           | 16384                                          |
| 23 Spectral Size           | 65536                                          |

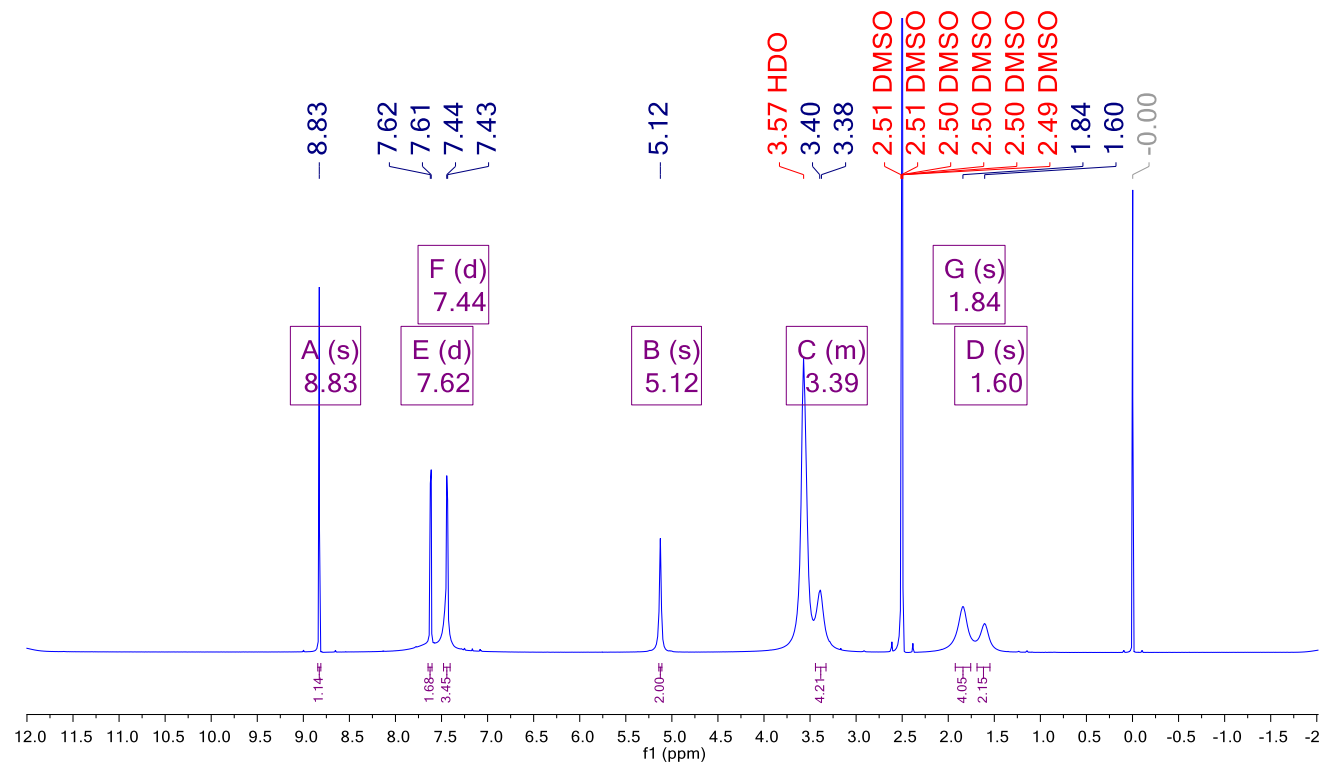



## 2-Nitro-7-(4-(piperidin-1-yl)benzyl)imidazo[1,2-a]pyrazin-8(7H)-one (34p)



### <sup>13</sup>C NMR (150 MHz, DMSO-*d*<sub>6</sub>)

| Parameter                  | Value                                          |
|----------------------------|------------------------------------------------|
| 1 Title                    | CWA8967_055_ppt_DCM_MeO<br>H_cryoprobe.2.fid   |
| 2 Origin                   | Bruker BioSpin GmbH                            |
| 3 Owner                    | nmr                                            |
| 4 Spectrometer             | spect                                          |
| 5 Solvent                  | DMSO                                           |
| 6 Temperature              | 298.0                                          |
| 7 Pulse Sequence           | zgpg                                           |
| 8 Experiment               | 1D                                             |
| 9 Probe                    | Z129649_0009 (CP TCI 600S3<br>H&F-C/ N-D-05 Z) |
| 10 Number of Scans         | 2560                                           |
| 11 Receiver Gain           | 191.6                                          |
| 12 Relaxation Delay        | 1.0000                                         |
| 13 Pulse Width             | 12.0000                                        |
| 14 Presaturation Frequency |                                                |
| 15 Acquisition Time        | 0.9044                                         |
| 16 Acquisition Date        | 2018-05-16T03:36:59                            |
| 17 Modification Date       | 2018-05-16T03:36:59                            |
| 18 Spectrometer Frequency  | 150.92                                         |
| 19 Spectral Width          | 36231.9                                        |
| 20 Lowest Frequency        | -3025.7                                        |
| 21 Nucleus                 | 13C                                            |
| 22 Acquired Size           | 32768                                          |
| 23 Spectral Size           | 65536                                          |

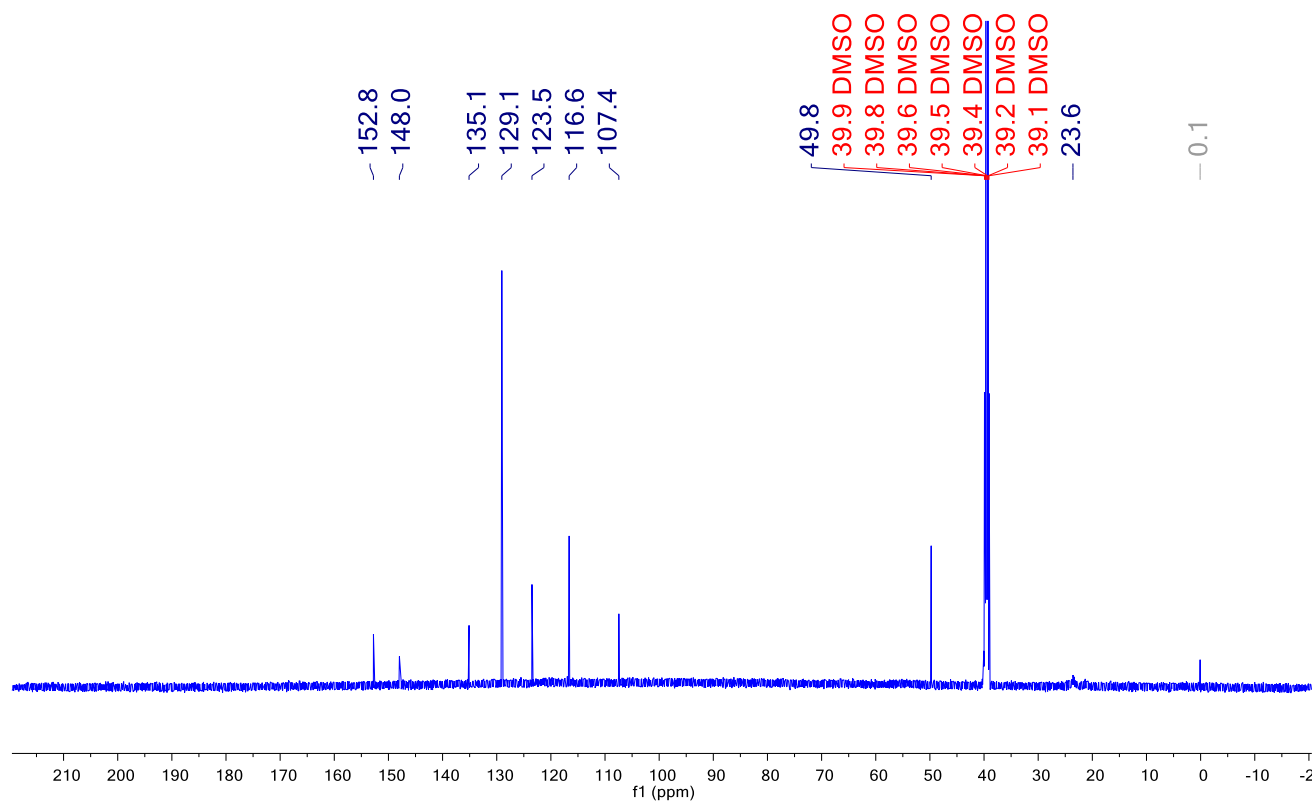

## References

1. Sykes, M. L.; Baell, J. B.; Kaiser, M.; Chatelain, E.; Moawad, S. R.; Ganame, D.; Ioset, J.-R.; Avery, V. M. Identification of compounds with anti-proliferative activity against *Trypanosoma brucei* strain 427 by a whole cell viability based HTS campaign. *PLoS Negl. Trop. Dis.* **2012**, 6, e1896-e1896.
